# Supplementary material
Source: PubMed Central journal article supplement (PMC6396865)
Supplement: rccm.201712-2551OC_prasse_data_supplement.pdf [file rccm.201712-2551OC_prasse_data_supplement.pdf]

## Supplement

# BAL Cell Gene Expression is indicative of Outcome and Airway Basal Cell involvement in IPF

Prasse A et al.

### Page Numbers

|                                                                                           |              |
|-------------------------------------------------------------------------------------------|--------------|
| <b>Table of Contents</b> -----                                                            | <b>1</b>     |
| <b>Supplementary Methods</b> -----                                                        | <b>2-6</b>   |
| Study population-----                                                                     | 2            |
| BAL sampling -----                                                                        | 2            |
| BAL cell isolation and differential counts -----                                          | 3            |
| RNA isolation -----                                                                       | 3            |
| Microarray -----                                                                          | 3            |
| nCounter expression analysis-----                                                         | 3            |
| GAP index-----                                                                            | 4            |
| Network analysis-----                                                                     | 4            |
| Determining the gene expression profile of airway basal cells -----                       | 4-5          |
| Immuno-cytology and Immuno-histochemistry -----                                           | 5            |
| Statistical Analysis-----                                                                 | 5-6          |
| <b>Supplementary Tables</b> -----                                                         | <b>7-56</b>  |
| Table E1 Baseline Characteristics of IPF Patients and HV -----                            | 7            |
| Table E2 Baseline Characteristics of Sarcoid Patients and HV-----                         | 8            |
| Table E3 Baseline Characteristics of COPD Patients and HV-----                            | 9            |
| Table E4 BAL cell Genes related to Mortality in IPF-----                                  | 10-36        |
| Table E5 9-Gene Signature picked by Componentwise Boosting -----                          | 37           |
| Table E6 C-Indeces and Confidence Interval of the Signature related to Mortality-----     | 38           |
| Table E7 6-Gene Signature picked by Componentwise Boosting -----                          | 39           |
| Table E8 Network Analysis of the BAL Signature related to Mortality -----                 | 40           |
| Table E9 ABC Gene Signature -----                                                         | 41-56        |
| Table E10 ABC Gene Signature picked by Componentwise Boosting -----                       | 57           |
| Table E11 C-Indeces and Confidence Interval of the ABC Signature related to Mortality --- | 58           |
| <b>Supplementary Figures</b> -----                                                        | <b>59-62</b> |
| Figure E1 Study Design -----                                                              | 59           |
| Figure E2 Sorting Strategy for Alveolar Macrophages -----                                 | 60           |
| Figure E3 Determination of the Airway Basal Cell Signature -----                          | 61           |
| Figure E4 Increase in CK5+ Airway Basal Cells in BAL of IPF Patients-----                 | 62           |
| Figure E5 S100A14 Immunohistochemistry-----                                               | 63           |
| <b>Supplementary References</b> -----                                                     | <b>64</b>    |

## SUPPLEMENTARY METHODS

### Study population

Bronchoalveolar lavage was obtained from 212 consecutive patients at 3 different tertiary referral centers: Freiburg (Germany), Siena (Italy) and Leuven (Belgium) (Figure E1). All patients signed informed consent prior to inclusion and the studies were approved by the respective local ethic committee and were registered at the German Clinical Trials Register; DRKS00000017 and DRKS00000620). IPF diagnosis was established by a multidisciplinary board at each institution according to the American Thoracic Society/European Respiratory Society criteria<sup>1,2</sup> and was later determined to be consistent with recent guidelines.<sup>3</sup> Only patients with an idiopathic UIP and HRCT consistent with a “definite” or “possible” UIP pattern were included. In patients with possible UIP at HRCT an UIP confirming histology was warranted. A lung biopsy was obtained in 33% of affected subjects. In all three centres pulmonary function tests were routinely performed with a standard methodology, according to the ATS/ERS recommendations using a body-plethysmograph.<sup>4</sup> Survival status was obtained from follow-up visits and telephone interviews. Patients who had not been seen within 3 months were called to confirm their vitality. Ten patients underwent a lung transplant. None of the patients received pirfenidone or nintedanib prior to BAL examination, however during follow-up, patients were treated with varied treatment regimens including corticosteroids, azathioprine, N-acetylcysteine and pirfenidone. All patients were Caucasians except one patient of the Leuven cohort. Twenty healthy volunteers (HV) were recruited as controls at the University Medical Center Freiburg, Germany. All these volunteers were apparently healthy and lung disease was ruled out by pulmonary function test and clinical examination (Table E1).

BAL cells from 26 patients with sarcoidosis, 20 with stage III and 6 with stage IV disease, and 20 healthy volunteers were harvested in an additional study at the University Medical Center Freiburg and gene expression analysed in a collaborative project with Stromedix/Biogen Idec Inc (Table E2).

Furthermore, BAL cells from 29 patients with COPD and 28 healthy volunteers were harvested in a collaborative study with Boehringer Ingelheim Pharma at the Fraunhofer Institute ITEM, Hannover, Germany. All patients and healthy volunteers were current smoker (Table E3).

### BAL sampling

Regarding the IPF cohort, in each of the 3 center BAL was performed in the middle lobe using a standardized procedure. Sterile, pre-warmed saline (37°C) was instilled by 20ml aliquots with immediate aspiration by gentle suction after each aliquot. There were a few differences between the centers; the first fraction was discarded in Leuven and Siena but not in Freiburg. Similarly the lavage volume was usually 300ml in Freiburg, but in Siena and in Leuven 150 ml. In all cases BAL cells were immediately isolated and frozen in TRIzol (#15596018, life technologies, Santa Clara, CA) at -80°C until RNA isolation.

Bronchoscopy, BAL and BAL cell isolation of the study comparing sarcoid patients with healthy volunteers were performed at the University Medical Center Freiburg using the same protocol as described for IPF patients.

Bronchoscopy and BAL of the study comparing patients with COPD with healthy volunteers were performed at the Fraunhofer institute ITEM at Hannover. BAL cells were isolated in accordance to a standardized protocol and harvested in 0.6 ml Qiazol.

### **BAL cell isolation and differential counts of IPF patients**

The retrieved BAL was immediately processed in the respective local laboratories. The fluid was pooled, filtered through two layers of gauze, and centrifuged at 500 g for 10 minutes at 4°C. The cells were counted and cell smears were stained with May-Grunwald-Giemsa stain (Merck, Darmstadt, Germany), and counted for the cell differentials.

### **RNA isolation**

Total RNA was extracted using a modified version of the TRIzol method, in which RNA is purified directly from the aqueous phase (RNeasy Mini Kit, #217004, Qiagen, Valencia, CA). RNA integrity was determined by assessing an aliquot of each RNA sample on an Agilent Bioanalyzer (Agilent Technologies, Palo Alto, CA). The concentration was determined using a NanoDrop ND-1000 spectrophotometer (NanoDrop Technologies, Wilmington, DE). High quality RNA with a sufficient yield was extracted from 184 BAL samples.

### **Microarray of IPF samples and respective controls**

Labeling of IPF samples and respective controls was performed using the Agilent Low RNA Input Linear Amplification Kit PLUS, one color (Agilent Technologies). Briefly, first-strand cDNA synthesis was performed using an oligo(dT) 24 primer containing a T7 RNA polymerase promoter site. The cDNA was used as a template to generate Cy3-labeled cRNA that was used for hybridization. After purification and fragmentation, aliquots of each sample were hybridized to Agilent SurePrint G3 Human Gene Expression 8 × 60K microarray kits (Agilent Technologies) with the only exception of the BAL samples from Leuven which were hybridized to Agilent SurePrint G3 Human Gene Expression 8 × 60K version 2 microarray kits (Agilent Technologies). After hybridization, each array was sequentially washed and scanned by Agilent microarray scanner. Arrays were individually visually inspected for hybridization defects, and quality control procedures were applied as recommended by the manufacturer of the arrays. For array readout, Agilent Feature Extraction 9.5.3 Software was used, and microarray data were imported, log<sub>2</sub>-transformed and quantile normalized using robust multi-array average (RMA), and expression levels were summarized on a transcript level using average gene expression values of the replicated probes, as recently described.<sup>5</sup> Non-expressed and invariant transcripts were removed using a median variance filter resulting in a final dataset of 20330 transcript measurements across 176 samples.

### **Microarray of sarcoid patients and respective controls**

Gene expression of BAL cells from 26 patients with sarcoidosis and 20 healthy volunteers was detected using Affymetrix Whole-Transcript Human Gene 1.0 ST array on an Affymetrix platform. Microarray data were normalized, log<sub>2</sub>-transformed and quantile normalized using robust multi-array average (RMA).

### **Microarray of COPD patients and respective controls**

Gene expression of BAL cells from 29 patients with COPD and 28 healthy volunteers was detected using Affymetrix Human Genome U133 Plus 2.0 array on an Affymetrix platform. Microarray data were normalized, log<sub>2</sub>-transformed and quantile normalized using robust multi-array average (RMA).

### **nCounter® expression analysis**

To validate the microarray data we applied multiplexed, color-coded probe pairs using the nCounter® expression analysis system (Nanostring).<sup>6</sup> After re-evaluation of RNA quality, 100 ng of total RNA per sample were hybridized with a custom code set generated based on the 6 stably selected genes and the endogenous controls ACTB, GAPDH, GUSB and B2M. After hybridization, gene transcript counts were obtained using the Nanostring preparation station and digital analyzer. Gene expression values of the genes which built up the signature associated with mortality were normalized to an average of positive, spiked-in and endogenous controls as recommended by the manufacturer using the nSolver analysis software. Normalized, log<sub>2</sub> transformed gene expression values were used for statistical analyses.

### **GAP Index**

The GAP index, a staging system for patients with IPF, was calculated as recently described using age, gender, FVC and DLCO.<sup>7</sup>

### **Network analysis**

Network analysis, based on the false discovery rates from the (age and gender adjusted) univariate analysis with respect to mortality, using Ingenuity (version 21901358) are depicted in Table E7.

### **Determining the gene expression profile of airway basal cells**

Alveolar macrophages were sorted from BAL of healthy volunteers by flow cytometry on a Moflo Astrios / Beckman Coulter cell sorter (sort strategy Figure E2). Cell pellet of  $1 \times 10^6$  sorted alveolar macrophages were solved in Quiazol (Quiagen, #79306) and immediately frozen at -80°C. RNA of alveolar macrophages was isolated accordingly to the protocol described for BAL cells.

Bronchial epithelial cells from healthy volunteers were harvested by bronchial brushes of sub-segmental bronchi of the right lower lobe during flexible bronchoscopy. Brushes were immediately placed in RNAprotect and cells were detached from each brush by flicking the brush in the RNAprotect cell reagent (Quiagen, #76526). Remaining solution was frozen at -80°C. RNA was isolated by RNeasy Protect Mini Kit (Qiagen, #74126).

Airway basal cells from healthy volunteers were isolated from bronchial brushes of sub-segmental bronchi of the right lower lobe as recently described.<sup>8</sup> Therefore bronchial brushes were placed in 2ml of pre-warmed (37°C) Clonetics™ Bronchial Epithelium Cell Growth Medium (BEGM, Lonza, Basel, Switzerland). Cells were detached from the brush by flicking the brush. Then, airway epithelial cells were pelleted by centrifugation (250×g, 5 min) and disaggregated by resuspension in 0.05% trypsin-ethylenediaminetetraacetic acid (EDTA) for 5 min at 37°C. Trypsinization was stopped by addition of HEPES buffered saline (Lonza, Basel, Switzerland) supplemented with 15% fetal bovine serum (FBS; GIBCO-Invitrogen, Carlsbad, CA), and the cells were again pelleted at 250×g, 5 min. The pellet was washed once with 5 ml of phosphate buffered saline (PBS). Afterwards, the cell pellet was resuspended in 5 ml of BEGM and cultured in T25 flasks in BEGM, supplemented with growth factors according to the manufacturer's instructions. The antibiotics supplied by the manufacturer of BEGM were used and additionally (50 mg/ ml; Sigma, St Louis, MO), 0.1% amphotericin B (BioWhittaker Amphotericin B Antifungal Lonza/ USA), and 1% penicillin-streptomycin (10000 U/ml Biochrom GmbH, Germany). Cultures were maintained in a humidified atmosphere of 5% CO<sub>2</sub> at 37°C. Unattached cells were removed by changing medium after 18 hr. Thereafter, media was changed every 3 days and cells were harvested at 21 days. Therefore, cells were trypsinized, harvested and counted. Purity of the airway basal cell population was detected by immunocytology (cytokeratin 5/6) of cytopins and always

exceeded 98%. Directly, after harvesting cells, 500000 airway basal cells were pelleted, solved in TRIzol and stored at -80°C. RNA of airway basal cells was isolated accordingly to the same protocol as for BAL cells.

Microarray data of 11 airway basal cell lines, of alveolar macrophages flow-sorted from 7 healthy donors and samples of bronchial epithelial cells derived from 4 healthy volunteers were obtained with the same method as described for BAL cells. The transcriptome of the three different cell types was compared using per-gene ANOVA resulting in 8874 genes significantly differently expressed between the three cell types ( $p < 0.0001$ ). The data of these 8874 transcripts were used for a clustering approach applying Cluster 3.0 software. The samples were hierarchically clustered with median normalization of the genes and centroid linkage, and the similarity metric used was Pearson correlation.

### **Immuno-cytology and Immuno-histochemistry**

Cell smears of BALs from 20 IPF patients, 10 patients with COPD and 10 healthy volunteers were evaluated by immuno-cytology. Cytological smears of bronchoalveolar lavages were air dried. In addition, immuno-histochemistry of formalin fixed lung tissues from 15 patients with IPF (7 wedge biopsies and 8 explants), 3 patients with sarcoidosis and 3 healthy lung donors (transplants) was performed. Three micrometer thick sections of paraffinblocks were deparaffinized in xylol and rehydrated using a descending alcohol row. Heat induced antigen retrieval was performed at 110°C for 2 minutes in citrate buffer (pH 6.0) using a pressure cooker. For double staining procedure monoclonal mouse anti-human antibody directed against CK5/6 (DAKO clone D5/16 B4, Hamburg, Germany) was incubated for 30 minutes at room temperature. Incubation time of the biotinilated secondary antibody (DAKO REAL AB2) was 20 minutes at room temperature. Activation was done using alkaline phosphatase (DAKO REAL Streptavidin Alkaline Phosphatase) for 15 minutes and visualization was performed by DAKO REAL Chromogen Red (incubation time 10 minutes). Prior to incubation with the second primary antibody, endogenous peroxidase was deactivated by H<sub>2</sub>O<sub>2</sub> for 10 minutes. Incubation time for the second primary antibody was 30 minutes (ΔNP63: polyclonal rabbit anti-human antibody Calbiochem PC373, Schwalbach, Germany). Peroxidase coupled secondary antibody (DAKO EnVision FLEX/HRP) was incubated for 20 minutes and visualization was performed using DAKO FLEX HRP Green Chromogen for 10 minutes. In addition, using the same immunohistochemistry protocol staining for S100A14 (ThermoFisher Scientific, #PA5-50783) and CK5 (ThermoFisher Scientific, #MA5-17057) was performed. Finally, all slides were counterstained by hematoxilin and coverslipped.

### **Statistical analysis**

For continuous baseline characteristics frequencies, mean values, and standard deviations were calculated, and chi-squared tests and ANOVAs were performed.

For BAL gene expression, heatmaps were built, using hierarchical clustering according to Euclidean distance and complete linkage.

For the endpoints of interest, univariate analyses were performed as a first step. Median was survival was calculated, censoring at the time of transplant. In the Freiburg (derivation) cohort, univariate Cox proportional hazards models were calculated for each gene separately adjusted for age and gender using a cutoff of 0.05 on the false discovery rate (FDR).<sup>9</sup> To avoid batch effects, comparison of IPF to healthy control BAL was done only in samples from Freiburg. For this we used logistic regression models, adjusted for age and gender, and FDR values were calculated as above. For enrichment analysis we used global tests based on (adjusted) univariate models according to Goeman and colleagues.<sup>10</sup> This approach to test

whether the effects of a group of genes are significantly different from zero was also used for all other enrichment analyses, using univariate Cox models for analyses with respect to mortality (adjusted for age and gender), and univariate logistic regression models for enrichment analyses in group comparisons, i.e. for comparison of Freiburg IPF patients to healthy controls (adjusted for age and gender), of sarcoidosis patients to healthy volunteers (adjusted for age, gender, % neutrophils, and % lymphocytes), and of COPD patients to healthy volunteers.

### **Component-wise likelihood based boosting for variable selection**

We used componentwise likelihood-based boosting<sup>11</sup> for developing a multivariable risk prediction signature, considering all genes simultaneously in a Cox model, adjusted for age and gender.

Similar to the LASSO,<sup>12</sup> the size of the regression coefficients is penalized so that only coefficients for genes are estimated whose expression is strongly associated with survival. This results in a model, where the coefficients of most genes are zero. On the other hand genes with non-zero coefficient are termed selected since they improve the model fit. In contrast to the LASSO, in component-wise likelihood based boosting the coefficients are estimated in a stage-wise procedure. During a number of boosting steps, which is determined by cross validation, the coefficient of the regressor which, given the so far estimated regression model, most strongly improves the model fit, receives an update. For example, in a linear regression model, at boosting step  $m$  with non-zero regression coefficients for gene  $x$  and  $y$ , the coefficient of gene  $z$  would be updated if regressing the residuals of the so far estimated model over  $z$  would increase the model fit. The size of the update is controlled by a penalty term, which can be set individually for each regressor. By restricting the penalty to zero, the procedure allows for the inclusion of mandatory covariates, such as age or gender.

The number of boosting steps, which determines the number of genes to be selected for the signature, was chosen by 10-fold cross-validation. For identifying high- and low-risk groups, we considered for each patient and each signature gene, whether the expression level of the gene for this patient was above the median expression level of all patients. Genes with risk-increasing effect, i.e. positive coefficient, being above the median were counted as one point in the risk score, and reversely for genes with risk-decreasing effect. Patients were divided at the median of the resulting risk score, and differences were evaluated by logrank tests.

Stably selected genes were identified from signature building in 100 resampling data sets. Genes from the signature obtained from the original data were considered for further validation in the nCounter® expression data if they were selected in at least 20% of these resampling data sets (using the results from<sup>13</sup> as an orientation for the cutoff). The high/low risk indicator derived from the gene expression signature (transferred to the nCounter® expression data by counting the number of over-expressed signature genes per patients and splitting at the median) was entered into a multivariable Cox regression model together with the GAP staging information to test for added value. Prediction error curves<sup>14</sup>, which indicate the mean squared error in predicting patient survival in the course of time, were used to evaluate the signature alone, and the signature in addition to the GAP index. In addition to prediction accuracy (as evaluated e.g. by ROC curves), these prediction error curves also indicate calibration.<sup>14</sup>

**Table E1. Baseline Characteristics of IPF Patients and HV**

| <b>Table E1. Baseline Characteristics of IPF Patients and HV*</b> |                                  |                                 |
|-------------------------------------------------------------------|----------------------------------|---------------------------------|
| <b>Characteristic</b>                                             | <b>IPF<br/>Freiburg<br/>N=62</b> | <b>HV<br/>Freiburg<br/>N=20</b> |
| Age -yr                                                           | 67.4 ± 9.1                       | 61.9 ± 7.6                      |
| Male sex -%                                                       | 85                               | 75                              |
| FVC percent predicted value -%                                    | 66 ± 20                          | 96 ± 19                         |
| <b>Smoking Status</b>                                             |                                  |                                 |
| Never smoked -%                                                   | 42                               | 30                              |
| Former smoker-%                                                   | 56                               | 70                              |
| Current smoker-%                                                  | 2                                | 0                               |
| <b>Bronchoalveolar Lavage (BAL)</b>                               |                                  |                                 |
| Cell count →×10 <sup>6</sup> cells                                | 12.1 ± 7.2                       | 9.3 ± 4.6                       |
| Alveolar macrophages -%                                           | 71 ± 17                          | 76 ± 13                         |
| Lymphocytes -%                                                    | 11 ± 9                           | 20 ± 13                         |
| Neutrophils -%                                                    | 12 ± 14                          | 3 ± 4                           |
| Eosinophils -%                                                    | 4 ± 5                            | 0 ± 1                           |

\* Plus-minus values are means ±SD unless otherwise indicated. FVC denotes for forced vital capacity. HV denotes for healthy volunteers. IPF denotes for idiopathic pulmonary fibrosis.

**Table E2. Baseline Characteristics of Sarcoid Patients and additional HV**

| <b>Table E2. Baseline Characteristics of Sarcoid Patients and HV*</b> |                                   |                                 |
|-----------------------------------------------------------------------|-----------------------------------|---------------------------------|
| <b>Characteristic</b>                                                 | <b>SARC<br/>Freiburg<br/>N=26</b> | <b>HV<br/>Freiburg<br/>N=20</b> |
| Age -yr                                                               | 48.5 ± 13.8                       | 31.8 ± 15.7                     |
| Male sex -%                                                           | 65                                | 60                              |
| FVC percent predicted value -%                                        | 68 ± 19                           | 112 ± 10                        |
| <b>Smoking Status</b>                                                 |                                   |                                 |
| Never smoked -%                                                       | 85                                | 80                              |
| Former smoker-%                                                       | 15                                | 20                              |
| Current smoker-%                                                      | 0                                 | 0                               |
| <b>Bronchoalveolar Lavage (BAL)</b>                                   |                                   |                                 |
| Cell count –×10 <sup>6</sup> cells                                    | 10.9 ± 5.8                        | 10.4 ± 9.6                      |
| Alveolar macrophages -%                                               | 66 ± 16                           | 87 ± 7                          |
| Lymphocytes -%                                                        | 28 ± 15                           | 10 ± 6                          |
| Neutrophils -%                                                        | 4 ± 6                             | 2 ± 2                           |
| Eosinophils -%                                                        | 1 ± 1                             | 0 ± 1                           |

\* Plus-minus values are means ±SD unless otherwise indicated. FVC denotes for forced vital capacity. HV denotes for healthy volunteers. SARC denotes for sarcoidosis.



**Table E3. Baseline Characteristics of COPD Patients and respective HV**

| <b>Table E3. Baseline Characteristics of COPD Patients and HV*</b> |                                 |                                   |                |
|--------------------------------------------------------------------|---------------------------------|-----------------------------------|----------------|
| <b>Characteristic</b>                                              | <b>HV<br/>Hannover<br/>N=28</b> | <b>COPD<br/>Hannover<br/>N=29</b> | <b>p-value</b> |
| Age -yr                                                            | 53.4 ± 6.9                      | 54.5 ± 7.0                        | 0.54           |
| Male sex -%                                                        | 68                              | 59                                |                |
| FVC percent predicted value -%                                     | 119 ± 14                        | 97 ± 9                            | 5.7E-09        |
| FEV percent predicted value -%                                     | 109 ± 14                        | 63 ± 9                            | 3.8E-21        |
| <b>Smoking Status</b>                                              |                                 |                                   |                |
| Never smoked -%                                                    | na                              | na                                |                |
| Former smoker-%                                                    | na                              | na                                |                |
| Current smoker-%                                                   | 100                             | 100                               |                |
| Pack years                                                         | 36 ± 13                         | 54 ± 24                           | 0.0008         |
| <b>Bronchoalveolar Lavage (BAL)</b>                                |                                 |                                   |                |
| Cell count –×10 <sup>6</sup> cells                                 | 36.6 ± 20.0                     | 32.2 ± 18.8                       | 0.39           |
| Alveolar macrophages -%                                            | 96 ± 3                          | 95 ± 4                            | 0.43           |
| Lymphocytes -%                                                     | 2 ± 2                           | 2 ± 2                             | 0.47           |
| Neutrophils -%                                                     | 2 ± 2                           | 2 ± 2                             | 0.97           |
| Eosinophils -%                                                     | 0 ± 0                           | 1 ± 1                             | 0.18           |

\* Plus-minus values are means ±SD. FVC denotes for forced vital capacity. FEV1 denotes for forced expiratory volume. HV denotes for healthy volunteers. COPD denotes for chronic obstructive pulmonary disease.

**Table E4. BAL cell Genes related to Mortality in IPF**

| Table E4. BAL cell Genes related to Mortality in IPF with FDR<0.05 |           |                                                                                     |             |             |      |        |      |
|--------------------------------------------------------------------|-----------|-------------------------------------------------------------------------------------|-------------|-------------|------|--------|------|
| Symbol                                                             | Gene Name | p-value                                                                             | FDR*        | HR          | CI   | Freq** |      |
| 1                                                                  | BMP6      | bone morphogenetic protein 6                                                        | 8.34553E-10 | 9.54573E-06 | 2.04 | 0.764  | 0.54 |
| 2                                                                  | S100A14   | S100 calcium binding protein A14                                                    | 9.39078E-10 | 9.54573E-06 | 1.85 | 0.748  | 0.47 |
| 3                                                                  | STAB1     | stabilin 1                                                                          | 2.3319E-09  | 1.58025E-05 | 2.53 | 0.758  | 0.37 |
| 4                                                                  | LOC284751 | cDNA FLJ33286 fis, clone ASTRO2014174                                               | 1.77482E-08 | 3.3665E-05  | 2.04 | 0.704  | 0.34 |
| 5                                                                  | TPST1     | tyrosylprotein sulfotransferase 1                                                   | 1.24212E-08 | 3.3665E-05  | 1.62 | 0.744  | 0.24 |
| 6                                                                  | LOC388210 | similar to GM17625                                                                  | 1.93611E-08 | 3.3665E-05  | 2.38 | 0.684  | 0.14 |
| 7                                                                  | HTRA1     | HtrA serine peptidase 1                                                             | 8.90271E-09 | 3.3665E-05  | 2.35 | 0.768  | 0.11 |
| 8                                                                  | TM4SF1    | transmembrane 4 L six family member 1                                               | 1.98711E-08 | 3.3665E-05  | 1.57 | 0.740  | 0.05 |
| 9                                                                  | MMP25     | matrix metalloproteinase 25                                                         | 1.80271E-08 | 3.3665E-05  | 1.97 | 0.737  | 0.05 |
| 10                                                                 | NETO2     | neuropilin (NRP) and tolloid (TLL)-like 2                                           | 1.75388E-08 | 3.3665E-05  | 5.57 | 0.732  | 0.01 |
| 11                                                                 | SLC36A1   | solute carrier family 36 (proton/amino acid symporter), member 1                    | 1.00546E-08 | 3.3665E-05  | 5.13 | 0.724  | 0    |
| 12                                                                 | TLR2      | toll-like receptor 2                                                                | 9.60861E-09 | 3.3665E-05  | 3.44 | 0.730  | 0    |
| 13                                                                 | IBSP      | integrin-binding sialoprotein                                                       | 2.66835E-08 | 4.17289E-05 | 2.04 | 0.747  | 0.54 |
| 14                                                                 | FAM198B   | family with sequence similarity 198, member B                                       | 3.1409E-08  | 4.56104E-05 | 2.11 | 0.725  | 0.03 |
| 15                                                                 | GALNT14   | UDP-N-acetyl-alpha-D-galactosamine:polypeptide N-acetylgalactosaminyltransferase 14 | 3.77246E-08 | 5.11295E-05 | 1.92 | 0.717  | 0.09 |
| 16                                                                 | SLC34A2   | solute carrier family 34                                                            | 4.0942E-08  | 5.20219E-05 | 1.54 | 0.735  | 0.02 |
| 17                                                                 | ENAH      | enabled homolog                                                                     | 5.15147E-08 | 6.16056E-05 | 2.39 | 0.689  | 0.05 |
| 18                                                                 | ADM       | adrenomedullin                                                                      | 6.21741E-08 | 6.8816E-05  | 1.93 | 0.708  | 0.02 |
| 19                                                                 | DLGAP3    | discs, large (Drosophila) homolog-associated protein 3                              | 6.43141E-08 | 6.8816E-05  | 4.50 | 0.749  | 0    |
| 20                                                                 | S100A12   | S100 calcium binding protein A12                                                    | 6.83934E-08 | 6.95219E-05 | 1.40 | 0.715  | 0.09 |
| 21                                                                 | MRV1      | murine retrovirus integration site 1 homolog                                        | 7.44406E-08 | 7.20656E-05 | 1.76 | 0.749  | 0.16 |
| 22                                                                 | MTSS1     | metastasis suppressor 1                                                             | 8.87837E-08 | 7.8477E-05  | 1.64 | 0.720  | 0.05 |
| 23                                                                 | MUC21     | mucin 21, cell surface associated                                                   | 8.62643E-08 | 7.8477E-05  | 1.56 | 0.704  | 0.02 |
| 24                                                                 | FAM40B    | family with sequence similarity 40, member B                                        | 1.01435E-07 | 8.59242E-05 | 2.37 | 0.709  | 0.02 |
| 25                                                                 | BCL6      | B-cell CLL/lymphoma 6                                                               | 1.09437E-07 | 8.89942E-05 | 5.96 | 0.683  | 0    |
| 26                                                                 | JPH4      | junctophilin 4                                                                      | 1.17378E-07 | 9.17807E-05 | 0.40 | 0.722  | 0    |
| 27                                                                 | CAMK1     | calcium/calmodulin-dependent protein kinase I                                       | 1.28903E-07 | 9.5842E-05  | 2.92 | 0.738  | 0.02 |
| 28                                                                 | DYSF      | dysferlin, limb girdle muscular dystrophy 2B                                        | 1.32001E-07 | 9.5842E-05  | 2.02 | 0.711  | 0    |
| 29                                                                 | NRG1      | neuregulin 1                                                                        | 1.71539E-07 | 0.000108639 | 1.75 | 0.719  | 0.16 |
| 30                                                                 | HS3ST1    | heparan sulfate (glucosamine) 3-O-sulfotransferase 1                                | 1.9696E-07  | 0.000108639 | 2.58 | 0.740  | 0.14 |
| 31                                                                 | RAB31L1   | RAB3A interacting protein                                                           | 1.97719E-07 | 0.000108639 | 2.52 | 0.737  | 0.07 |
| 32                                                                 | MAL2      | mal, T-cell differentiation protein 2                                               | 1.67131E-07 | 0.000108639 | 1.53 | 0.696  | 0.05 |
| 33                                                                 | FAM57A    | family with sequence similarity 57, member A                                        | 1.66678E-07 | 0.000108639 | 2.31 | 0.728  | 0.04 |
| 34                                                                 | SLC25A37  | solute carrier family 25, member 37                                                 | 1.85113E-07 | 0.000108639 | 2.58 | 0.698  | 0    |
| 35                                                                 | CHST15    | carbohydrate (N-acetylgalactosamine 4-sulfate 6-O) sulfotransferase 15              | 1.82659E-07 | 0.000108639 | 1.59 | 0.718  | 0    |
| 36                                                                 | GPR110    | G protein-coupled receptor 110                                                      | 1.58541E-07 | 0.000108639 | 1.91 | 0.671  | 0    |
| 37                                                                 | F5        | coagulation factor V                                                                | 1.93673E-07 | 0.000108639 | 1.90 | 0.697  | 0    |
| 38                                                                 | CHST2     | carbohydrate (N-acetylglucosamine 6-O) sulfotransferase 2                           | 2.30293E-07 | 0.000111473 | 1.70 | 0.702  | 0.05 |
| 39                                                                 | SLCO4A1   | solute carrier organic anion transporter family, member 4A1                         | 2.08897E-07 | 0.000111473 | 1.77 | 0.692  | 0.02 |
| 40                                                                 | PRSS8     | protease, serine, 8                                                                 | 2.18964E-07 | 0.000111473 | 1.67 | 0.723  | 0    |
| 41                                                                 | C17orf76  | chromosome 17 open reading frame 76                                                 | 2.21776E-07 | 0.000111473 | 0.40 | 0.692  | 0    |
| 42                                                                 | CYR61     | cysteine-rich, angiogenic inducer, 61                                               | 2.30244E-07 | 0.000111473 | 1.51 | 0.698  | 0    |
| 43                                                                 | MYO1B     | myosin IB                                                                           | 2.42438E-07 | 0.000112017 | 1.91 | 0.673  | 0.02 |
| 44                                                                 | CEACAM6   | carcinoembryonic antigen-related cell adhesion molecule 6                           | 2.38535E-07 | 0.000112017 | 1.44 | 0.725  | 0.01 |
| 45                                                                 | CXCL14    | chemokine (C-X-C motif) ligand 14                                                   | 2.53543E-07 | 0.000114545 | 1.52 | 0.726  | 0.17 |
| 46                                                                 | SFTA3     | surfactant associated 3                                                             | 2.86533E-07 | 0.000119968 | 1.59 | 0.676  | 0.02 |
| 47                                                                 | MET       | met proto-oncogene                                                                  | 3.00953E-07 | 0.000119968 | 1.58 | 0.715  | 0.01 |
| 48                                                                 | S1PR3     | sphingosine-1-phosphate receptor 3                                                  | 2.92768E-07 | 0.000119968 | 1.55 | 0.702  | 0.01 |
| 49                                                                 | MARCKS    | myristoylated alanine-rich protein kinase C substrate                               | 3.00124E-07 | 0.000119968 | 2.42 | 0.733  | 0    |
| 50                                                                 | ASB13     | ankyrin repeat and SOCS box-containing 13                                           | 2.73898E-07 | 0.000119968 | 0.22 | 0.689  | 0    |
| 51                                                                 | CRB3      | crumbs homolog 3                                                                    | 2.97047E-07 | 0.000119968 | 1.80 | 0.696  | 0    |
| 52                                                                 | RAB3D     | RAB3D, member RAS oncogene family                                                   | 3.13679E-07 | 0.000120323 | 2.36 | 0.736  | 0.01 |
| 53                                                                 | TIMP1     | TIMP metalloproteinase inhibitor 1                                                  | 3.11884E-07 | 0.000120323 | 3.35 | 0.704  | 0    |
| 54                                                                 | MXD1      | MAX dimerization protein 1                                                          | 3.38175E-07 | 0.000127317 | 3.00 | 0.689  | 0    |
| 55                                                                 | AATK      | apoptosis-associated tyrosine kinase                                                | 3.61342E-07 | 0.000128879 | 1.91 | 0.715  | 0.05 |

|     |              |                                                                       |             |             |       |       |      |
|-----|--------------|-----------------------------------------------------------------------|-------------|-------------|-------|-------|------|
| 56  | RGL1         | ral guanine nucleotide dissociation stimulator-like 1                 | 3.6079E-07  | 0.000128879 | 2.13  | 0.734 | 0.01 |
| 57  | NCKAP1       | NCK-associated protein 1                                              | 3.60153E-07 | 0.000128879 | 2.27  | 0.659 | 0.01 |
| 58  | CCNJL        | cyclin J-like                                                         | 3.70647E-07 | 0.000129518 | 2.36  | 0.691 | 0.09 |
| 59  | SFN          | stratifin                                                             | 3.75876E-07 | 0.000129518 | 1.79  | 0.694 | 0    |
| 60  | METTL7B      | methyltransferase like 7B                                             | 3.83466E-07 | 0.000129931 | 1.99  | 0.711 | 0    |
| 61  | ANKRD22      | ankyrin repeat domain 22                                              | 4.38317E-07 | 0.000133129 | 1.63  | 0.719 | 0.22 |
| 62  | AGR3         | anterior gradient homolog 3                                           | 4.04675E-07 | 0.000133129 | 1.60  | 0.732 | 0.05 |
| 63  | MERTK        | c-mer proto-oncogene tyrosine kinase                                  | 4.42453E-07 | 0.000133129 | 1.95  | 0.745 | 0.04 |
| 64  | CREB5        | cAMP responsive element binding protein 5                             | 4.1408E-07  | 0.000133129 | 4.66  | 0.704 | 0    |
| 65  | LOC100132707 | hypothetical LOC100132707                                             | 4.44656E-07 | 0.000133129 | 0.08  | 0.707 | 0    |
| 66  | TPCN1        | two pore segment channel 1                                            | 4.44161E-07 | 0.000133129 | 1.83  | 0.725 | 0    |
| 67  | LOC100131733 | hypothetical LOC100131733                                             | 4.45864E-07 | 0.000133129 | 0.26  | 0.710 | 0    |
| 68  | CDC42EP2     | CDC42 effector protein (Rho GTPase binding) 2                         | 4.5184E-07  | 0.000133129 | 2.20  | 0.698 | 0    |
| 69  | PRSS23       | protease, serine, 23                                                  | 4.16236E-07 | 0.000133129 | 1.64  | 0.698 | 0    |
| 70  | LCP2         | lymphocyte cytosolic protein 2                                        | 4.73558E-07 | 0.000137535 | 4.96  | 0.701 | 0    |
| 71  | SCHIP1       | schwannomin interacting protein 1                                     | 5.38759E-07 | 0.000154267 | 2.07  | 0.700 | 0    |
| 72  | ANTXR2       | anthrax toxin receptor 2                                              | 5.5269E-07  | 0.000156058 | 2.95  | 0.707 | 0    |
| 73  | CXCR7        | chemokine (C-X-C motif) receptor 7                                    | 6.66807E-07 | 0.000176428 | 0.49  | 0.716 | 0.03 |
| 74  | SFTPB        | surfactant protein B                                                  | 6.54617E-07 | 0.000176428 | 1.45  | 0.730 | 0.03 |
| 75  | PROK2        | prokineticin 2                                                        | 6.41857E-07 | 0.000176428 | 1.57  | 0.721 | 0.03 |
| 76  | SFTA2        | surfactant associated 2                                               | 6.68224E-07 | 0.000176428 | 1.64  | 0.696 | 0    |
| 77  | MEF2C        | myocyte enhancer factor 2C                                            | 6.556E-07   | 0.000176428 | 2.62  | 0.708 | 0    |
| 78  | FA2H         | fatty acid 2-hydroxylase                                              | 6.86837E-07 | 0.000179018 | 1.81  | 0.691 | 0.02 |
| 79  | PLA2G7       | phospholipase A2, group VII                                           | 7.2124E-07  | 0.000185605 | 2.13  | 0.724 | 0    |
| 80  | ALPL         | alkaline phosphatase, liver/bone/kidney                               | 7.95627E-07 | 0.000202117 | 1.77  | 0.704 | 0.12 |
| 81  | LOC100132234 | similar to hCG2020055                                                 | 8.38103E-07 | 0.000202117 | 0.31  | 0.716 | 0.03 |
| 82  | PELI1        | pellino homolog 1                                                     | 8.45052E-07 | 0.000202117 | 3.49  | 0.708 | 0    |
| 83  | SUSD2        | sushi domain containing 2                                             | 8.40738E-07 | 0.000202117 | 1.61  | 0.720 | 0    |
| 84  | SCGB3A2      | secretoglobulin, family 3A, member 2                                  | 8.20491E-07 | 0.000202117 | 2.19  | 0.699 | 0    |
| 85  | IFNAR1       | interferon -alpha receptor 1                                          | 8.28761E-07 | 0.000202117 | 10.84 | 0.709 | 0    |
| 86  | SPRY2        | sprouty homolog 2                                                     | 8.67126E-07 | 0.000204469 | 3.04  | 0.723 | 0    |
| 87  | ALDH1A3      | aldehyde dehydrogenase 1 family, member A3                            | 8.75003E-07 | 0.000204469 | 1.91  | 0.679 | 0    |
| 88  | PTGER2       | prostaglandin E receptor 2 (subtype EP2), 53kDa                       | 9.26103E-07 | 0.000213951 | 2.71  | 0.704 | 0    |
| 89  | CD24         | CD24 molecule                                                         | 9.68321E-07 | 0.000221191 | 2.02  | 0.707 | 0    |
| 90  | PTGIR        | prostaglandin I2 (prostacyclin) receptor (IP)                         | 1.03482E-06 | 0.000233755 | 1.63  | 0.682 | 0.01 |
| 91  | CEACAM7      | carcinoembryonic antigen-related cell adhesion molecule 7             | 1.05201E-06 | 0.000235026 | 1.52  | 0.709 | 0    |
| 92  | FAM20A       | family with sequence similarity 20, member A                          | 1.1584E-06  | 0.000249807 | 2.06  | 0.724 | 0    |
| 93  | LAMB3        | laminin, beta 3                                                       | 1.16732E-06 | 0.000249807 | 1.93  | 0.703 | 0    |
| 94  | TRPM6        | transient receptor potential cation channel, subfamily M, member 6    | 1.14138E-06 | 0.000249807 | 2.15  | 0.677 | 0    |
| 95  | LILRB2       | leukocyte immunoglobulin-like receptor, subfamily B                   | 1.16668E-06 | 0.000249807 | 3.44  | 0.695 | 0    |
| 96  | PPP1R3B      | protein phosphatase 1, regulatory (inhibitor) subunit 3B (PPP1R3B)    | 1.21525E-06 | 0.0002563   | 5.40  | 0.666 | 0    |
| 97  | CLIC6        | chloride intracellular channel 6                                      | 1.22288E-06 | 0.0002563   | 1.65  | 0.669 | 0    |
| 98  | SLC30A1      | solute carrier family 30 (zinc transporter), member 1                 | 1.25685E-06 | 0.000258703 | 3.65  | 0.685 | 0    |
| 99  | GGA2         | golgi associated, gamma adaptin ear containing, ARF binding protein 2 | 1.25979E-06 | 0.000258703 | 0.24  | 0.682 | 0    |
| 100 | SLC44A1      | solute carrier family 44, member 1                                    | 1.31531E-06 | 0.000267378 | 3.27  | 0.674 | 0    |
| 101 | PLEKHG2      | pleckstrin homology domain containing, family G                       | 1.32834E-06 | 0.000267378 | 2.61  | 0.714 | 0    |
| 102 | LAPTM4B      | lysosomal protein transmembrane 4 beta                                | 1.37861E-06 | 0.000274776 | 2.79  | 0.733 | 0.05 |
| 103 | RASSF2       | Ras association                                                       | 1.40342E-06 | 0.000277005 | 1.99  | 0.705 | 0    |
| 104 | KANK1        | KN motif and ankyrin repeat domains 1                                 | 1.43783E-06 | 0.000281067 | 1.91  | 0.740 | 0.03 |
| 105 | SLC39A8      | solute carrier family 39                                              | 1.47447E-06 | 0.000285485 | 2.59  | 0.698 | 0.01 |
| 106 | SOD3         | superoxide dismutase 3, extracellular                                 | 1.5802E-06  | 0.000303071 | 1.50  | 0.722 | 0.07 |
| 107 | EPCAM        | epithelial cell adhesion molecule                                     | 1.709E-06   | 0.000315559 | 1.54  | 0.700 | 0    |
| 108 | SCEL         | sciellin                                                              | 1.71544E-06 | 0.000315559 | 1.67  | 0.672 | 0    |
| 109 | CXCL17       | chemokine (C-X-C motif) ligand 17                                     | 1.71167E-06 | 0.000315559 | 1.66  | 0.686 | 0    |
| 110 | PAK1         | p21 protein                                                           | 1.72292E-06 | 0.000315559 | 7.73  | 0.683 | 0    |
| 111 | DDHD1        | DDHD domain containing 1                                              | 1.66597E-06 | 0.000315559 | 0.42  | 0.701 | 0    |
| 112 | AKAP5        | A kinase                                                              | 1.74327E-06 | 0.000316434 | 0.57  | 0.693 | 0.02 |
| 113 | GPR84        | G protein-coupled receptor 84                                         | 1.82432E-06 | 0.000325338 | 2.40  | 0.696 | 0.01 |
| 114 | CCL7         | chemokine (C-C motif) ligand 7                                        | 1.82056E-06 | 0.000325338 | 1.64  | 0.717 | 0    |
| 115 | FBLN5        | fibulin 5                                                             | 1.90667E-06 | 0.000331543 | 1.68  | 0.726 | 0.08 |
| 116 | IRX2         | iroquois homeobox 2                                                   | 1.90805E-06 | 0.000331543 | 1.61  | 0.694 | 0    |

|     |           |                                                                        |             |             |       |       |      |
|-----|-----------|------------------------------------------------------------------------|-------------|-------------|-------|-------|------|
| 117 | EFNB1     | ephrin-B1                                                              | 1.89596E-06 | 0.000331543 | 0.33  | 0.665 | 0    |
| 118 | KCNJ15    | potassium inwardly-rectifying channel, subfamily J, member 15          | 1.96388E-06 | 0.000338353 | 1.87  | 0.689 | 0.01 |
| 119 | LRRC70    | leucine rich repeat containing 70                                      | 2.02443E-06 | 0.000343009 | 2.03  | 0.663 | 0.03 |
| 120 | CHSY1     | chondroitin sulfate synthase 1                                         | 2.02465E-06 | 0.000343009 | 4.17  | 0.694 | 0    |
| 121 | CTTN      | cortactin                                                              | 2.08999E-06 | 0.000348275 | 1.76  | 0.711 | 0.01 |
| 122 | PIM3      | pim-3 oncogene                                                         | 2.07622E-06 | 0.000348275 | 4.67  | 0.698 | 0    |
| 123 | ACOX2     | acyl-Coenzyme A oxidase 2, branched chain                              | 2.13682E-06 | 0.000353183 | 2.25  | 0.732 | 0    |
| 124 | IER3      | immediate early response 3                                             | 2.20683E-06 | 0.000353266 | 2.35  | 0.708 | 0    |
| 125 | MYO1A     | myosin IA                                                              | 2.19298E-06 | 0.000353266 | 0.41  | 0.708 | 0    |
| 126 | MGAM      | maltase-glucoamylase (alpha-glucosidase)                               | 2.18766E-06 | 0.000353266 | 1.96  | 0.669 | 0    |
| 127 | TNNC1     | troponin C type 1                                                      | 2.16218E-06 | 0.000353266 | 2.28  | 0.696 | 0    |
| 128 | KCNK1     | potassium channel, subfamily K, member 1                               | 2.23507E-06 | 0.000354991 | 1.92  | 0.701 | 0    |
| 129 | F13A1     | coagulation factor XIII, A1 polypeptide                                | 2.3224E-06  | 0.000365977 | 1.86  | 0.702 | 0.03 |
| 130 | FAM110C   | family with sequence similarity 110, member C                          | 2.34502E-06 | 0.000366724 | 2.51  | 0.654 | 0    |
| 131 | TCEA3     | transcription elongation factor A (SII), 3                             | 2.4601E-06  | 0.000381785 | 0.48  | 0.703 | 0.04 |
| 132 | LOC257358 | hypothetical LOC257358                                                 | 2.49079E-06 | 0.00038362  | 2.03  | 0.686 | 0    |
| 133 | CLEC4G    | C-type lectin domain family 4, member G                                | 2.55824E-06 | 0.000391038 | 1.66  | 0.707 | 0.03 |
| 134 | C3orf62   | chromosome 3 open reading frame 62                                     | 2.57742E-06 | 0.000391038 | 0.25  | 0.693 | 0    |
| 135 | CXCL1     | chemokine (C-C motif) ligand 1                                         | 2.62174E-06 | 0.000392043 | 1.85  | 0.696 | 0    |
| 136 | GTF3C6    | general transcription factor IIIc, polypeptide 6, alpha                | 2.62262E-06 | 0.000392043 | 12.88 | 0.673 | 0    |
| 137 | FAM157A   | family with sequence similarity 157, member A                          | 2.65053E-06 | 0.000392771 | 2.16  | 0.656 | 0    |
| 138 | NKX2-1    | NK2 homeobox 1                                                         | 2.66613E-06 | 0.000392771 | 1.53  | 0.662 | 0    |
| 139 | RAB25     | RAB25, member RAS oncogene family                                      | 2.68594E-06 | 0.000392843 | 1.77  | 0.687 | 0    |
| 140 | ATP13A3   | ATPase type 13A3                                                       | 2.81343E-06 | 0.00040855  | 3.72  | 0.680 | 0    |
| 141 | LOC151438 | cDNA FUJ31315 fis, clone LIVER1000303                                  | 2.88507E-06 | 0.000415982 | 1.73  | 0.714 | 0.02 |
| 142 | S1PR1     | sphingosine-1-phosphate receptor 1                                     | 2.91347E-06 | 0.000417119 | 1.45  | 0.699 | 0.05 |
| 143 | NLRP3     | NLR family, pyrin domain containing 3                                  | 3.11331E-06 | 0.000442612 | 2.17  | 0.691 | 0    |
| 144 | GABARAPL1 | GABA (A) receptor-associated protein like 1                            | 3.17631E-06 | 0.000446987 | 0.21  | 0.716 | 0    |
| 145 | EMR2      | egf-like module containing, mucin-like, hormone receptor-like 2        | 3.21004E-06 | 0.000446987 | 2.89  | 0.713 | 0    |
| 146 | EFEMP1    | EGF-containing fibulin-like extracellular matrix protein 1             | 3.20288E-06 | 0.000446987 | 1.55  | 0.688 | 0    |
| 147 | ADAM8     | ADAM metallopeptidase domain 8                                         | 3.35166E-06 | 0.000456054 | 1.92  | 0.712 | 0    |
| 148 | CSF3R     | colony stimulating factor 3 receptor                                   | 3.36489E-06 | 0.000456054 | 2.29  | 0.674 | 0    |
| 149 | PDE2A     | phosphodiesterase 2A, cGMP-stimulated                                  | 3.32935E-06 | 0.000456054 | 2.40  | 0.701 | 0    |
| 150 | ODC1      | ornithine decarboxylase 1                                              | 3.3056E-06  | 0.000456054 | 12.27 | 0.687 | 0    |
| 151 | SPON2     | spondin 2, extracellular matrix protein                                | 3.6292E-06  | 0.000485405 | 1.37  | 0.698 | 0    |
| 152 | GJA1      | gap junction protein, alpha 1, 43kDa                                   | 3.60857E-06 | 0.000485405 | 1.91  | 0.670 | 0    |
| 153 | PLIN4     | perilipin 4                                                            | 3.66511E-06 | 0.000487005 | 1.79  | 0.686 | 0    |
| 154 | B3GNT3    | UDP-GlcNAc:betaGal beta-1,3-N-acetylglucosaminyltransferase 3          | 3.95358E-06 | 0.000521924 | 1.79  | 0.705 | 0.01 |
| 155 | MYO5C     | myosin VC                                                              | 3.98907E-06 | 0.000523211 | 1.68  | 0.661 | 0.02 |
| 156 | PXN       | paxillin                                                               | 4.07267E-06 | 0.000527372 | 1.62  | 0.703 | 0    |
| 157 | CDKL1     | cyclin-dependent kinase-like 1                                         | 4.0622E-06  | 0.000527372 | 0.14  | 0.692 | 0    |
| 158 | CCL2      | chemokine (C-C motif) ligand 2                                         | 4.17565E-06 | 0.000533906 | 1.69  | 0.743 | 0.02 |
| 159 | TMEM30B   | transmembrane protein 30B                                              | 4.16236E-06 | 0.000533906 | 1.80  | 0.664 | 0    |
| 160 | TRIM47    | tripartite motif-containing 47                                         | 4.24196E-06 | 0.000538835 | 2.33  | 0.730 | 0    |
| 161 | CD300E    | CMRF35-like molecule 2 Precursor                                       | 4.26722E-06 | 0.000538835 | 2.12  | 0.680 | 0    |
| 162 | TBC1D14   | TBC1 domain family, member 14                                          | 4.35707E-06 | 0.000546785 | 5.47  | 0.702 | 0    |
| 163 | MATK      | megakaryocyte-associated tyrosine kinase                               | 4.38984E-06 | 0.000547518 | 2.19  | 0.711 | 0    |
| 164 | NOV       | nephroblastoma overexpressed gene                                      | 4.4781E-06  | 0.000555121 | 1.84  | 0.709 | 0    |
| 165 | IL1R2     | interleukin 1 receptor, type II                                        | 5.10483E-06 | 0.000617072 | 1.48  | 0.720 | 0.03 |
| 166 | EPHA4     | EPH receptor A4                                                        | 5.01837E-06 | 0.000617072 | 1.95  | 0.697 | 0.03 |
| 167 | PDCD1LG2  | programmed cell death 1 ligand 2                                       | 5.05752E-06 | 0.000617072 | 0.57  | 0.702 | 0    |
| 168 | PTPRF     | protein tyrosine phosphatase, receptor type, F                         | 5.12962E-06 | 0.000617072 | 1.63  | 0.711 | 0    |
| 169 | ABCC2     | ATP-binding cassette, sub-family C (CFTR/MRP), member 2                | 5.12386E-06 | 0.000617072 | 3.06  | 0.696 | 0    |
| 170 | PTPRE     | protein tyrosine phosphatase, receptor type, E                         | 5.1782E-06  | 0.000619252 | 2.48  | 0.676 | 0    |
| 171 | TCEB1     | transcription elongation factor B (SIII), polypeptide 1                | 5.40519E-06 | 0.000638881 | 11.77 | 0.683 | 0    |
| 172 | TMEM2     | transmembrane protein 2                                                | 5.39491E-06 | 0.000638881 | 3.16  | 0.686 | 0    |
| 173 | FNBP1L    | formin binding protein 1-like                                          | 5.53398E-06 | 0.000650322 | 1.75  | 0.686 | 0.03 |
| 174 | WWC1      | WW and C2 domain containing 1                                          | 5.65886E-06 | 0.000661176 | 1.82  | 0.674 | 0    |
| 175 | TDG       | thymine-DNA glycosylase                                                | 5.90095E-06 | 0.000685521 | 8.20  | 0.696 | 0    |
| 176 | ID1       | inhibitor of DNA binding 1, dominant negative helix-loop-helix protein | 5.9825E-06  | 0.00068779  | 1.71  | 0.684 | 0.01 |
| 177 | COX15     | COX15 homolog, cytochrome c oxidase assembly protein                   | 5.98814E-06 | 0.00068779  | 0.39  | 0.696 | 0    |

|     |            |                                                                                                               |             |             |      |       |      |
|-----|------------|---------------------------------------------------------------------------------------------------------------|-------------|-------------|------|-------|------|
| 178 | FNIP2      | folliculin interacting protein 2                                                                              | 6.21284E-06 | 0.000708866 | 3.57 | 0.694 | 0    |
| 179 | PAWR       | PRKC, apoptosis, WT1, regulator                                                                               | 6.24137E-06 | 0.000708866 | 1.91 | 0.698 | 0    |
| 180 | FJX1       | four jointed box 1                                                                                            | 6.34685E-06 | 0.000716842 | 2.08 | 0.705 | 0    |
| 181 | ANXA3      | annexin A3                                                                                                    | 6.44205E-06 | 0.000723574 | 1.90 | 0.703 | 0.01 |
| 182 | SNAI1      | snail homolog 1                                                                                               | 6.48829E-06 | 0.000724763 | 1.83 | 0.690 | 0.02 |
| 183 | TMEM98     | transmembrane protein 98                                                                                      | 6.57185E-06 | 0.000730085 | 1.58 | 0.676 | 0    |
| 184 | TMEM125    | transmembrane protein 125                                                                                     | 6.61312E-06 | 0.000730677 | 1.68 | 0.706 | 0    |
| 185 | ZBTB4      | zinc finger and BTB domain containing 4                                                                       | 6.69227E-06 | 0.000735427 | 0.06 | 0.727 | 0    |
| 186 | LGALS3BP   | lectin, galactoside-binding, soluble, 3 binding protein                                                       | 6.86525E-06 | 0.000746367 | 0.39 | 0.669 | 0    |
| 187 | TREML2     | triggering receptor expressed on myeloid cells-like 2                                                         | 6.844E-06   | 0.000746367 | 2.00 | 0.711 | 0    |
| 188 | HIF1A      | hypoxia inducible factor 1, alpha subunit                                                                     | 7.10063E-06 | 0.000764846 | 3.76 | 0.654 | 0    |
| 189 | ACPP       | acid phosphatase, prostate                                                                                    | 7.11047E-06 | 0.000764846 | 1.73 | 0.673 | 0    |
| 190 | WIF1       | WNT inhibitory factor 1                                                                                       | 7.19373E-06 | 0.000769729 | 1.57 | 0.665 | 0    |
| 191 | SPP1       | secreted phosphoprotein 1                                                                                     | 7.35129E-06 | 0.00078247  | 1.68 | 0.741 | 0.01 |
| 192 | SMPDL3A    | sphingomyelin phosphodiesterase, acid-like 3A                                                                 | 7.47319E-06 | 0.000783144 | 1.88 | 0.696 | 0    |
| 193 | PPIF       | peptidylprolyl isomerase F                                                                                    | 7.47046E-06 | 0.000783144 | 4.30 | 0.667 | 0    |
| 194 | CTSE       | cathepsin E                                                                                                   | 7.45685E-06 | 0.000783144 | 1.73 | 0.681 | 0    |
| 195 | HOMER3     | homer homolog 3                                                                                               | 7.79689E-06 | 0.000808729 | 3.37 | 0.727 | 0    |
| 196 | F2RL1      | coagulation factor II (thrombin) receptor-like 1                                                              | 7.76966E-06 | 0.000808729 | 1.73 | 0.681 | 0    |
| 197 | ZNF570     | zinc finger protein 570                                                                                       | 8.05592E-06 | 0.000831354 | 0.23 | 0.679 | 0    |
| 198 | MMP24      | matrix metalloproteinase 24                                                                                   | 8.30412E-06 | 0.00085264  | 1.63 | 0.668 | 0    |
| 199 | STEAP4     | STEAP family member 4                                                                                         | 8.58155E-06 | 0.000864992 | 1.54 | 0.738 | 0.09 |
| 200 | SLC16A1    | solute carrier family 16, member 1                                                                            | 8.50399E-06 | 0.000864992 | 2.77 | 0.702 | 0.08 |
| 201 | PRKCB      | protein kinase C, beta                                                                                        | 8.51983E-06 | 0.000864992 | 1.68 | 0.684 | 0.01 |
| 202 | OASL       | 2'-5'-oligoadenylate synthetase-like                                                                          | 8.61643E-06 | 0.000864992 | 0.42 | 0.703 | 0    |
| 203 | VAV3       | vav 3 guanine nucleotide exchange factor                                                                      | 8.64866E-06 | 0.000864992 | 3.13 | 0.667 | 0    |
| 204 | FZD2       | frizzled homolog 2                                                                                            | 8.6797E-06  | 0.000864992 | 3.96 | 0.703 | 0    |
| 205 | AMPD3      | adenosine monophosphate deaminase                                                                             | 8.75046E-06 | 0.00086774  | 1.95 | 0.692 | 0    |
| 206 | C5orf62    | chromosome 5 open reading frame 62                                                                            | 8.83533E-06 | 0.00086774  | 2.48 | 0.668 | 0    |
| 207 | MEX3A      | mex-3 homolog A                                                                                               | 8.8347E-06  | 0.00086774  | 2.01 | 0.643 | 0    |
| 208 | C9orf89    | chromosome 9 open reading frame 89                                                                            | 9.35221E-06 | 0.000914088 | 4.14 | 0.690 | 0    |
| 209 | RTCD1      | RNA terminal phosphate cyclase domain 1                                                                       | 9.41524E-06 | 0.000915846 | 9.29 | 0.706 | 0    |
| 210 | FCAR       | Fc fragment of IgA, receptor for                                                                              | 9.55356E-06 | 0.000918051 | 1.69 | 0.713 | 0.07 |
| 211 | SELL       | selectin L                                                                                                    | 9.49608E-06 | 0.000918051 | 1.49 | 0.676 | 0.02 |
| 212 | LOC388780  | hypothetical LOC388780                                                                                        | 9.57338E-06 | 0.000918051 | 1.69 | 0.675 | 0    |
| 213 | NPL        | N-acetylneuraminate pyruvate lyase                                                                            | 9.62989E-06 | 0.000919134 | 5.49 | 0.683 | 0    |
| 214 | FERMT2     | fermitin family homolog 2                                                                                     | 9.77173E-06 | 0.000928314 | 1.68 | 0.685 | 0    |
| 215 | CECR6      | cat eye syndrome chromosome region, candidate 6                                                               | 9.94253E-06 | 0.000935795 | 2.05 | 0.716 | 0.01 |
| 216 | SPINT2     | serine peptidase inhibitor, Kunitz type, 2                                                                    | 9.91908E-06 | 0.000935795 | 0.16 | 0.704 | 0    |
| 217 | SLC7A2     | solute carrier family 7                                                                                       | 9.99032E-06 | 0.000935959 | 2.56 | 0.653 | 0    |
| 218 | KCNJ2      | potassium inwardly-rectifying channel, subfamily J, member 2                                                  | 1.02391E-05 | 0.000952112 | 2.39 | 0.701 | 0.01 |
| 219 | CMTM8      | CKLF-like MARVEL transmembrane domain containing 8                                                            | 1.02564E-05 | 0.000952112 | 1.83 | 0.683 | 0    |
| 220 | TRIM21     | tripartite motif-containing 21                                                                                | 1.03378E-05 | 0.00095531  | 0.28 | 0.668 | 0    |
| 221 | UCK2       | uridine-cytidine kinase 2                                                                                     | 1.04892E-05 | 0.000964914 | 3.64 | 0.713 | 0    |
| 222 | NIPAL4     | NIPA-like domain containing 4                                                                                 | 1.06427E-05 | 0.000974624 | 1.80 | 0.640 | 0.02 |
| 223 | SH3D19     | SH3 domain containing 19                                                                                      | 1.07889E-05 | 0.00098358  | 1.75 | 0.694 | 0.01 |
| 224 | SEPT4      | septin 4                                                                                                      | 1.09386E-05 | 0.000987911 | 0.51 | 0.705 | 0.18 |
| 225 | HS3ST3B1   | Heparan sulfate glucosamine 3-O-sulfotransferase 3B1                                                          | 1.09194E-05 | 0.000987911 | 1.67 | 0.706 | 0.01 |
| 226 | FBLIM1     | filamin binding LIM protein 1                                                                                 | 1.09822E-05 | 0.000987911 | 2.23 | 0.659 | 0    |
| 227 | HAMP       | hepcidin antimicrobial peptide                                                                                | 1.13217E-05 | 0.001011312 | 2.09 | 0.692 | 0    |
| 228 | VSTM2L     | V-set and transmembrane domain containing 2 like                                                              | 1.13418E-05 | 0.001011312 | 1.85 | 0.644 | 0    |
| 229 | SLC20A1    | solute carrier family 20                                                                                      | 1.19543E-05 | 0.001052085 | 3.88 | 0.685 | 0    |
| 230 | RGL4       | ral guanine nucleotide dissociation stimulator-like 4                                                         | 1.19091E-05 | 0.001052085 | 1.51 | 0.692 | 0    |
| 231 | ST6GALNAC1 | ST6 (alpha-N-acetyl-neuraminyl-2,3-beta-galactosyl-1,3)-N-acetylgalactosaminide alpha-2,6-sialyltransferase 1 | 1.19455E-05 | 0.001052085 | 1.68 | 0.673 | 0    |
| 232 | BRD4       | bromodomain containing 4                                                                                      | 1.20435E-05 | 0.001055368 | 2.17 | 0.676 | 0.01 |
| 233 | HSD17B8    | hydroxysteroid (17-beta) dehydrogenase 8                                                                      | 1.21409E-05 | 0.001059335 | 0.23 | 0.665 | 0    |
| 234 | MGC4859    | hypothetical protein MGC4859 similar to HSPA8                                                                 | 1.25519E-05 | 0.001088665 | 0.24 | 0.697 | 0    |
| 235 | C1orf182   | chromosome 1 open reading frame 182                                                                           | 1.25842E-05 | 0.001088665 | 0.37 | 0.685 | 0    |
| 236 | ZNF32      | zinc finger protein 32                                                                                        | 1.26659E-05 | 0.00109109  | 0.19 | 0.681 | 0    |
| 237 | MMP1       | matrix metalloproteinase 1                                                                                    | 1.30717E-05 | 0.001107281 | 1.68 | 0.693 | 0.01 |
| 238 | PAPSS2     | 3'-phosphoadenosine 5'-phosphosulfate synthase 2                                                              | 1.29382E-05 | 0.001107281 | 3.20 | 0.722 | 0    |

|     |              |                                                                                               |             |             |      |       |      |
|-----|--------------|-----------------------------------------------------------------------------------------------|-------------|-------------|------|-------|------|
| 239 | TNFRSF10C    | tumor necrosis factor receptor superfamily, member 10c, decoy without an intracellular domain | 1.30017E-05 | 0.001107281 | 2.14 | 0.667 | 0    |
| 240 | GGCT         | gamma-glutamyl cyclotransferase                                                               | 1.30238E-05 | 0.001107281 | 5.61 | 0.662 | 0    |
| 241 | ZNF814       | zinc finger protein 814                                                                       | 1.31909E-05 | 0.001112739 | 0.16 | 0.663 | 0    |
| 242 | BASP1        | brain abundant, membrane attached signal protein 1                                            | 1.33681E-05 | 0.001123028 | 2.52 | 0.685 | 0    |
| 243 | ANOS         | anoctamin 5                                                                                   | 1.38112E-05 | 0.001155479 | 0.58 | 0.664 | 0    |
| 244 | C6orf154     | chromosome 6 open reading frame 154                                                           | 1.44798E-05 | 0.001206455 | 1.91 | 0.676 | 0.01 |
| 245 | SSTR2        | somatostatin receptor 2                                                                       | 1.49259E-05 | 0.001238547 | 1.79 | 0.729 | 0.08 |
| 246 | TNFRSF11A    | tumor necrosis factor receptor superfamily, member 11a, NFKB activator                        | 1.54398E-05 | 0.001275981 | 2.61 | 0.679 | 0    |
| 247 | EMR1         | egf-like module containing, mucin-like, hormone receptor-like 1                               | 1.59254E-05 | 0.001300251 | 0.50 | 0.715 | 0.11 |
| 248 | MYBPH        | myosin binding protein H                                                                      | 1.59154E-05 | 0.001300251 | 1.91 | 0.690 | 0    |
| 249 | MYC          | v-myc myelocytomatosis viral oncogene homolog                                                 | 1.58965E-05 | 0.001300251 | 2.52 | 0.704 | 0    |
| 250 | CCL4         | chemokine (CC-motif) ligand 4                                                                 | 1.62314E-05 | 0.001317579 | 1.91 | 0.687 | 0    |
| 251 | TMEM154      | transmembrane protein 154                                                                     | 1.62672E-05 | 0.001317579 | 1.70 | 0.697 | 0    |
| 252 | SERPING1     | serpin peptidase inhibitor, clade G                                                           | 1.64413E-05 | 0.001325522 | 0.69 | 0.664 | 0.01 |
| 253 | FSTL1        | folliculin-like 1                                                                             | 1.64957E-05 | 0.001325522 | 1.83 | 0.677 | 0    |
| 254 | TKTL1        | transketolase-like 1                                                                          | 1.66409E-05 | 0.001326702 | 1.61 | 0.663 | 0.03 |
| 255 | PLA2G16      | phospholipase A2, group XVI                                                                   | 1.66013E-05 | 0.001326702 | 0.39 | 0.688 | 0    |
| 256 | FDFT1        | farnesyl-diphosphate farnesyltransferase 1                                                    | 1.70953E-05 | 0.001352327 | 0.24 | 0.674 | 0    |
| 257 | MRS2         | MRS2 magnesium homeostasis factor homolog                                                     | 1.70895E-05 | 0.001352327 | 0.15 | 0.678 | 0    |
| 258 | SH3RF1       | SH3 domain containing ring finger 1                                                           | 1.76644E-05 | 0.001391924 | 1.89 | 0.719 | 0.05 |
| 259 | CLEC6A       | C-type lectin domain family 6, member A                                                       | 1.79663E-05 | 0.001404829 | 0.62 | 0.703 | 0.03 |
| 260 | SGK1         | serum/glucocorticoid regulated kinase 1                                                       | 1.79441E-05 | 0.001404829 | 3.29 | 0.678 | 0    |
| 261 | C6orf192     | chromosome 6 open reading frame 192                                                           | 1.81992E-05 | 0.001417583 | 2.03 | 0.678 | 0    |
| 262 | ELF3         | E74-like factor 3                                                                             | 1.82695E-05 | 0.001417632 | 1.60 | 0.680 | 0    |
| 263 | PARVA        | parvin, alpha                                                                                 | 1.85266E-05 | 0.001432117 | 2.49 | 0.654 | 0    |
| 264 | ALDH2        | aldehyde dehydrogenase 2 family (mitochondrial)                                               | 1.88501E-05 | 0.001451604 | 0.46 | 0.677 | 0    |
| 265 | EGR3         | early growth response 3                                                                       | 1.90237E-05 | 0.001453955 | 1.65 | 0.722 | 0.2  |
| 266 | LOC100132344 | cDNA FLJ43495 fis, clone PEBLM2000338.                                                        | 1.90136E-05 | 0.001453955 | 2.13 | 0.698 | 0    |
| 267 | ARID5B       | AT rich interactive domain 5B                                                                 | 1.94663E-05 | 0.001482209 | 1.77 | 0.710 | 0.01 |
| 268 | LOC730227    | cDNA FLJ14231 fis, clone NT2RP3004470                                                         | 1.9764E-05  | 0.001499264 | 2.58 | 0.648 | 0    |
| 269 | FABP4        | fatty acid binding protein 4, adipocyte                                                       | 2.0209E-05  | 0.001527318 | 0.72 | 0.664 | 0.01 |
| 270 | SPAG9        | sperm associated antigen 9                                                                    | 2.07135E-05 | 0.001559647 | 5.13 | 0.685 | 0    |
| 271 | ARHGAP20     | Rho GTPase activating protein 20                                                              | 2.17676E-05 | 0.001632973 | 2.84 | 0.637 | 0    |
| 272 | KRT23        | keratin 23                                                                                    | 2.27313E-05 | 0.001688739 | 1.57 | 0.674 | 0    |
| 273 | PDE3A        | phosphodiesterase 3A, cGMP-inhibited                                                          | 2.26062E-05 | 0.001688739 | 2.43 | 0.632 | 0    |
| 274 | MBOAT7       | membrane bound O-acyltransferase domain containing 7                                          | 2.27602E-05 | 0.001688739 | 2.72 | 0.679 | 0    |
| 275 | MRO          | maestro                                                                                       | 2.30366E-05 | 0.001697552 | 1.97 | 0.689 | 0.15 |
| 276 | ASPRV1       | aspartic peptidase, retroviral-like 1                                                         | 2.3046E-05  | 0.001697552 | 1.94 | 0.693 | 0    |
| 277 | KRT19        | keratin 19                                                                                    | 2.33242E-05 | 0.001711844 | 1.50 | 0.697 | 0    |
| 278 | SLC7A11      | solute carrier family 7, (cationic amino acid transporter, y+ system) member 11               | 2.36583E-05 | 0.001730117 | 1.75 | 0.637 | 0.03 |
| 279 | ASB10        | ankyrin repeat and SOCS box-containing 10                                                     | 2.40608E-05 | 0.001734597 | 0.48 | 0.697 | 0    |
| 280 | MPP6         | membrane protein, palmitoylated 6                                                             | 2.40236E-05 | 0.001734597 | 2.12 | 0.679 | 0    |
| 281 | LOC100130633 | ZMYM6 proteinZinc finger, MYM-type 6, isoform CRA_a                                           | 2.39418E-05 | 0.001734597 | 0.23 | 0.678 | 0    |
| 282 | MUC1         | mucin 1, cell surface associated                                                              | 2.39842E-05 | 0.001734597 | 1.53 | 0.682 | 0    |
| 283 | ANGPTL4      | angiopoietin-like 4                                                                           | 2.43277E-05 | 0.001736212 | 1.52 | 0.699 | 0.01 |
| 284 | SELENBP1     | selenium binding protein 1                                                                    | 2.45102E-05 | 0.001736212 | 1.54 | 0.680 | 0.01 |
| 285 | SERPINB9     | serpin peptidase inhibitor, clade B (ovalbumin), member 9                                     | 2.42934E-05 | 0.001736212 | 1.70 | 0.682 | 0    |
| 286 | CD93         | CD93 molecule                                                                                 | 2.4472E-05  | 0.001736212 | 1.75 | 0.677 | 0    |
| 287 | PGM5         | phosphoglucomutase 5                                                                          | 2.43612E-05 | 0.001736212 | 0.47 | 0.689 | 0    |
| 288 | ADORA3       | adenosine A3 receptor                                                                         | 2.46788E-05 | 0.00174208  | 1.87 | 0.693 | 0.02 |
| 289 | INPP5A       | inositol polyphosphate-5-phosphatase, 40kDa                                                   | 2.49417E-05 | 0.001754552 | 2.27 | 0.690 | 0    |
| 290 | ZNF124       | zinc finger protein 124                                                                       | 2.51169E-05 | 0.001760784 | 0.28 | 0.687 | 0    |
| 291 | CYBA         | cytochrome b-245, alpha polypeptide                                                           | 2.54225E-05 | 0.001776083 | 0.11 | 0.637 | 0    |
| 292 | GPR125       | G protein-coupled receptor 125                                                                | 2.5756E-05  | 0.001793218 | 1.80 | 0.670 | 0    |
| 293 | LHFPL2       | lipoma HMGIC fusion partner-like 2                                                            | 2.64189E-05 | 0.00183309  | 5.11 | 0.722 | 0    |
| 294 | CD177        | CD177 molecule                                                                                | 2.71023E-05 | 0.001874117 | 1.52 | 0.646 | 0    |
| 295 | PEBP1        | phosphatidylethanolamine binding protein 1                                                    | 2.73508E-05 | 0.001884886 | 0.15 | 0.654 | 0    |
| 296 | TRAF5        | TNF receptor-associated factor 5                                                              | 2.74658E-05 | 0.001886418 | 2.05 | 0.676 | 0    |
| 297 | TMEM158      | transmembrane protein 158                                                                     | 2.7822E-05  | 0.001904447 | 1.83 | 0.695 | 0    |
| 298 | MMP9         | matrix metalloproteinase 9                                                                    | 2.85712E-05 | 0.001929745 | 1.50 | 0.681 | 0    |
| 299 | MYO1D        | myosin ID                                                                                     | 2.84006E-05 | 0.001929745 | 1.70 | 0.691 | 0    |

|     |              |                                                                                |             |             |       |       |      |
|-----|--------------|--------------------------------------------------------------------------------|-------------|-------------|-------|-------|------|
| 300 | SEC14L1      | SEC14-like 1                                                                   | 2.85149E-05 | 0.001929745 | 4.24  | 0.665 | 0    |
| 301 | INHBB        | inhibin, beta B                                                                | 2.83124E-05 | 0.001929745 | 1.55  | 0.681 | 0    |
| 302 | MMP10        | matrix metalloproteinase 10                                                    | 2.95449E-05 | 0.001982333 | 1.36  | 0.664 | 0    |
| 303 | BCL2L13      | BCL2-like 13                                                                   | 2.95151E-05 | 0.001982333 | 0.24  | 0.700 | 0    |
| 304 | PARK2        | Parkin                                                                         | 2.99155E-05 | 0.002000597 | 0.46  | 0.686 | 0    |
| 305 | ITGB4        | integrin, beta 4                                                               | 3.02366E-05 | 0.002015443 | 1.77  | 0.667 | 0    |
| 306 | RGS2         | regulator of G-protein signaling 2, 24kDa                                      | 3.05761E-05 | 0.002031412 | 1.65  | 0.671 | 0    |
| 307 | LIMCH1       | LIM and calponin homology domains 1                                            | 3.15663E-05 | 0.002090367 | 1.63  | 0.687 | 0    |
| 308 | ICAM1        | intercellular adhesion molecule 1                                              | 3.19361E-05 | 0.002104759 | 2.32  | 0.669 | 0    |
| 309 | ASS1         | argininosuccinate synthetase 1                                                 | 3.19907E-05 | 0.002104759 | 1.58  | 0.667 | 0    |
| 310 | DBN1         | drebrin 1                                                                      | 3.30089E-05 | 0.002157783 | 1.72  | 0.716 | 0    |
| 311 | LOC100293193 | hypothetical LOC100293193                                                      | 3.30071E-05 | 0.002157783 | 1.76  | 0.688 | 0    |
| 312 | TBC1D4       | TBC1 domain family, member 4                                                   | 3.35403E-05 | 0.002185492 | 0.50  | 0.686 | 0    |
| 313 | PCDH20       | protocadherin 20                                                               | 3.49331E-05 | 0.002268979 | 2.39  | 0.621 | 0    |
| 314 | CGNL1        | cingulin-like 1                                                                | 3.57374E-05 | 0.002313827 | 1.57  | 0.647 | 0    |
| 315 | MGC16703     | tubulin, alpha pseudogene                                                      | 3.60628E-05 | 0.002315387 | 0.36  | 0.692 | 0.05 |
| 316 | RNASE2       | ribonuclease, RNase A family, 2                                                | 3.61032E-05 | 0.002315387 | 1.90  | 0.691 | 0    |
| 317 | CD163        | CD163 molecule                                                                 | 3.60982E-05 | 0.002315387 | 3.09  | 0.713 | 0    |
| 318 | HES4         | hairly and enhancer of split 4                                                 | 3.66033E-05 | 0.002340082 | 1.78  | 0.668 | 0    |
| 319 | BTN2A2       | butyrophilin, subfamily 2, member A2                                           | 3.69664E-05 | 0.002355886 | 0.18  | 0.678 | 0    |
| 320 | CNN3         | calponin 3, acidic                                                             | 3.78961E-05 | 0.002407587 | 1.61  | 0.649 | 0    |
| 321 | SYNJ2        | synaptojanin 2                                                                 | 3.80925E-05 | 0.002412522 | 2.23  | 0.672 | 0    |
| 322 | GHRL         | ghrelin/obestatin prepropeptide                                                | 3.89487E-05 | 0.002436394 | 2.02  | 0.701 | 0    |
| 323 | PTPRK        | protein tyrosine phosphatase, receptor type, K                                 | 3.88557E-05 | 0.002436394 | 1.55  | 0.673 | 0    |
| 324 | SDCCAG3      | serologically defined colon cancer antigen 3                                   | 3.88124E-05 | 0.002436394 | 11.83 | 0.702 | 0    |
| 325 | ZKSCAN3      | zinc finger with KRAB and SCAN domains 3                                       | 3.87964E-05 | 0.002436394 | 0.21  | 0.705 | 0    |
| 326 | DCLK1        | doublecortin-like kinase 1                                                     | 3.96816E-05 | 0.002473092 | 2.02  | 0.647 | 0    |
| 327 | FAM83E       | family with sequence similarity 83, member E                                   | 3.97787E-05 | 0.002473092 | 1.84  | 0.682 | 0    |
| 328 | SLPI         | secretory leukocyte peptidase inhibitor                                        | 4.06496E-05 | 0.002511748 | 1.56  | 0.700 | 0.01 |
| 329 | LRG1         | leucine-rich alpha-2-glycoprotein 1                                            | 4.08947E-05 | 0.002511748 | 1.90  | 0.676 | 0    |
| 330 | ABC6         | ATP-binding cassette, sub-family B (MDR/TAP), member 6                         | 4.08818E-05 | 0.002511748 | 2.58  | 0.690 | 0    |
| 331 | C7orf58      | chromosome 7 open reading frame 58                                             | 4.0843E-05  | 0.002511748 | 0.63  | 0.659 | 0    |
| 332 | FBXL13       | F-box and leucine-rich repeat protein 13                                       | 4.1022E-05  | 0.002511982 | 2.23  | 0.660 | 0    |
| 333 | SLC43A1      | solute carrier family 43, member 1                                             | 4.21551E-05 | 0.002573615 | 1.91  | 0.704 | 0    |
| 334 | TMEM54       | transmembrane protein 54                                                       | 4.27579E-05 | 0.002602597 | 2.03  | 0.658 | 0    |
| 335 | CLDN4        | claudin 4                                                                      | 4.42822E-05 | 0.002687335 | 1.43  | 0.685 | 0    |
| 336 | CRYBB1       | crystallin, beta B1                                                            | 4.47193E-05 | 0.002705785 | 1.69  | 0.676 | 0.04 |
| 337 | COL1A1       | collagen, type I, alpha 1                                                      | 4.4927E-05  | 0.002710285 | 1.50  | 0.713 | 0.13 |
| 338 | TMEM71       | transmembrane protein 71                                                       | 4.51247E-05 | 0.002714157 | 1.98  | 0.670 | 0    |
| 339 | CREM         | cAMP responsive element modulator                                              | 4.57204E-05 | 0.002725792 | 2.48  | 0.705 | 0    |
| 340 | CEACAM5      | carcinoembryonic antigen-related cell adhesion molecule 5                      | 4.56568E-05 | 0.002725792 | 1.71  | 0.663 | 0    |
| 341 | LOC644231    | similar to WAS protein homolog associated with actin, golgi membranes          | 4.56396E-05 | 0.002725792 | 0.33  | 0.700 | 0    |
| 342 | C4BPA        | complement component 4 binding protein, alpha                                  | 4.67291E-05 | 0.002777782 | 1.80  | 0.680 | 0    |
| 343 | RGNEF        | Rho-guanine nucleotide exchange factor                                         | 4.73732E-05 | 0.002807863 | 0.72  | 0.648 | 0    |
| 344 | MPO          | myeloperoxidase                                                                | 4.80811E-05 | 0.002828107 | 1.60  | 0.675 | 0    |
| 345 | SLC7A1       | solute carrier family 7 (cationic amino acid transporter, y+ system), member 1 | 4.81321E-05 | 0.002828107 | 2.68  | 0.696 | 0    |
| 346 | LCN2         | lipocalin 2                                                                    | 4.79111E-05 | 0.002828107 | 1.48  | 0.662 | 0    |
| 347 | GRAMD1C      | GRAM domain containing 1C                                                      | 4.84162E-05 | 0.002836602 | 1.89  | 0.663 | 0    |
| 348 | VNN3         | vanin 3                                                                        | 5.01877E-05 | 0.002931944 | 1.71  | 0.658 | 0    |
| 349 | CH25H        | cholesterol 25-hydroxylase                                                     | 5.06436E-05 | 0.002950097 | 1.78  | 0.684 | 0    |
| 350 | HGF          | hepatocyte growth factor                                                       | 5.09702E-05 | 0.002960642 | 1.88  | 0.656 | 0    |
| 351 | TANC1        | tetratricopeptide repeat, ankyrin repeat and coiled-coil containing 1          | 5.1362E-05  | 0.0029749   | 1.76  | 0.671 | 0.01 |
| 352 | UTY          | ubiquitously transcribed tetratricopeptide repeat gene, Y-linked               | 5.16538E-05 | 0.002983301 | 0.57  | 0.682 | 0    |
| 353 | ANKRD58      | ankyrin repeat domain 58                                                       | 5.18507E-05 | 0.002986189 | 0.28  | 0.666 | 0    |
| 354 | EMP1         | epithelial membrane protein 1                                                  | 5.23494E-05 | 0.002999008 | 1.95  | 0.698 | 0    |
| 355 | WDR70        | WD repeat domain 70                                                            | 5.23683E-05 | 0.002999008 | 0.11  | 0.670 | 0    |
| 356 | RHOBTB3      | Rho-related BTB domain containing 3                                            | 5.2855E-05  | 0.003018379 | 1.88  | 0.701 | 0.02 |
| 357 | ECM1         | extracellular matrix protein 1                                                 | 5.30201E-05 | 0.003019322 | 2.13  | 0.687 | 0    |
| 358 | FOLR3        | folate receptor 3                                                              | 5.33751E-05 | 0.00303105  | 0.53  | 0.714 | 0.05 |
| 359 | SFTPA1       | surfactant protein A1                                                          | 5.39447E-05 | 0.003038217 | 1.44  | 0.680 | 0    |
| 360 | RBM28        | RNA binding motif protein 28                                                   | 5.40991E-05 | 0.003038217 | 19.24 | 0.680 | 0    |

|     |              |                                                                                          |             |             |      |       |      |
|-----|--------------|------------------------------------------------------------------------------------------|-------------|-------------|------|-------|------|
| 361 | IFT20        | intraflagellar transport 20 homolog                                                      | 5.39904E-05 | 0.003038217 | 0.23 | 0.679 | 0    |
| 362 | UBE2G2       | ubiquitin-conjugating enzyme E2G 2                                                       | 5.39257E-05 | 0.003038217 | 0.11 | 0.688 | 0    |
| 363 | SFPQ         | splicing factor proline/glutamine-rich (polypyrimidine tract binding protein associated) | 5.44377E-05 | 0.003040434 | 8.79 | 0.656 | 0    |
| 364 | GPR56        | G protein-coupled receptor 56                                                            | 5.43706E-05 | 0.003040434 | 1.42 | 0.692 | 0    |
| 365 | MYLIP        | myosin regulatory light chain interacting protein                                        | 5.49383E-05 | 0.003059987 | 2.36 | 0.681 | 0    |
| 366 | EGR4         | early growth response 4                                                                  | 5.68633E-05 | 0.003158554 | 2.37 | 0.654 | 0    |
| 367 | ABHD14A      | abhydrolase domain containing 14A                                                        | 5.70827E-05 | 0.003158695 | 0.11 | 0.659 | 0    |
| 368 | CMKLR1       | chemokine-like receptor 1                                                                | 5.7332E-05  | 0.003158695 | 1.96 | 0.722 | 0    |
| 369 | FAM20C       | family with sequence similarity 20, member C                                             | 5.7263E-05  | 0.003158695 | 2.72 | 0.681 | 0    |
| 370 | C2orf80      | chromosome 2 open reading frame 80                                                       | 5.81267E-05 | 0.003185216 | 1.62 | 0.657 | 0.03 |
| 371 | IGFBP7       | insulin-like growth factor binding protein 7                                             | 5.80442E-05 | 0.003185216 | 2.66 | 0.682 | 0    |
| 372 | SOBP         | sine oculis binding protein homolog                                                      | 5.88709E-05 | 0.003214025 | 0.59 | 0.652 | 0    |
| 373 | LOC283454    | cDNA FLJ37411 fis, clone BRAMY2028682                                                    | 5.89686E-05 | 0.003214025 | 1.75 | 0.619 | 0    |
| 374 | CFI          | complement factor I                                                                      | 5.95914E-05 | 0.003239288 | 1.62 | 0.652 | 0.01 |
| 375 | MT1G         | metallothionein 1G                                                                       | 5.99001E-05 | 0.003247385 | 1.94 | 0.682 | 0    |
| 376 | FANCD2       | Fanconi anemia, complementation group D2                                                 | 6.03229E-05 | 0.003261605 | 0.39 | 0.674 | 0    |
| 377 | APOBEC3B     | apolipoprotein B mRNA editing enzyme, catalytic polypeptide-like 3B                      | 6.07168E-05 | 0.0032742   | 1.89 | 0.647 | 0    |
| 378 | ADORA2A      | adenosine A2a receptor                                                                   | 6.16498E-05 | 0.003306967 | 1.57 | 0.674 | 0.01 |
| 379 | RIBC2        | RIB43A domain with coiled-coils 2                                                        | 6.14988E-05 | 0.003306967 | 1.77 | 0.676 | 0.01 |
| 380 | QPCT         | glutaminy-peptide cyclotransferase                                                       | 6.31314E-05 | 0.003359845 | 2.64 | 0.680 | 0    |
| 381 | LAMA3        | laminin, alpha 3                                                                         | 6.31062E-05 | 0.003359845 | 1.64 | 0.646 | 0    |
| 382 | NGEF         | neuronal guanine nucleotide exchange factor                                              | 6.29942E-05 | 0.003359845 | 2.40 | 0.672 | 0    |
| 383 | CYP2J2       | cytochrome P450, family 2, subfamily J, polypeptide 2                                    | 6.39957E-05 | 0.003396949 | 2.29 | 0.673 | 0    |
| 384 | SGTB         | small glutamine-rich tetratricopeptide repeat (TPR)-containing, beta                     | 6.44431E-05 | 0.003397916 | 3.19 | 0.662 | 0    |
| 385 | MREG         | melanoregulin                                                                            | 6.45153E-05 | 0.003397916 | 2.28 | 0.672 | 0    |
| 386 | CHST11       | carbohydrate (chondroitin 4) sulfotransferase 11                                         | 6.42701E-05 | 0.003397916 | 4.07 | 0.671 | 0    |
| 387 | PLEKHB1      | pleckstrin homology domain containing, family B                                          | 6.49593E-05 | 0.003401715 | 0.32 | 0.674 | 0    |
| 388 | C6orf108     | chromosome 6 open reading frame 108                                                      | 6.53824E-05 | 0.003401715 | 6.14 | 0.714 | 0    |
| 389 | CLEC12A      | C-type lectin domain family 12, member A                                                 | 6.52923E-05 | 0.003401715 | 0.34 | 0.696 | 0    |
| 390 | PLIN5        | perilipin 5                                                                              | 6.5424E-05  | 0.003401715 | 1.50 | 0.648 | 0    |
| 391 | SHC2         | SHC (Src homology 2 domain containing) transforming protein 2                            | 6.53105E-05 | 0.003401715 | 1.73 | 0.673 | 0    |
| 392 | PIPOX        | pipecolic acid oxidase                                                                   | 6.56588E-05 | 0.003405211 | 0.24 | 0.691 | 0    |
| 393 | LOC100128697 | cDNA FLJ42049 fis, clone SPLEN2041720.                                                   | 6.60324E-05 | 0.003415875 | 2.60 | 0.630 | 0    |
| 394 | ATP6V1C1     | ATPase, H+ transporting, lysosomal 42kDa, V1 subunit C1                                  | 6.6201E-05  | 0.003415906 | 5.31 | 0.667 | 0    |
| 395 | TMEM55A      | transmembrane protein 55A                                                                | 6.72446E-05 | 0.00346097  | 2.29 | 0.662 | 0    |
| 396 | FOXA2        | forkhead box A2                                                                          | 6.79982E-05 | 0.003490916 | 1.67 | 0.646 | 0    |
| 397 | RNF145       | ring finger protein 145                                                                  | 6.94399E-05 | 0.003555953 | 3.05 | 0.665 | 0    |
| 398 | PKIG         | protein kinase (cAMP-dependent, catalytic) inhibitor gamma                               | 6.99301E-05 | 0.00357206  | 0.47 | 0.668 | 0    |
| 399 | CYP4F3       | cytochrome P450, family 4, subfamily F, polypeptide 3                                    | 7.07514E-05 | 0.00358915  | 1.39 | 0.668 | 0.05 |
| 400 | TRPM2        | transient receptor potential cation channel, subfamily M, member 2                       | 7.09709E-05 | 0.00358915  | 2.27 | 0.667 | 0    |
| 401 | RNASE3       | ribonuclease, RNase A family, 3 (eosinophil cationic protein)                            | 7.07892E-05 | 0.00358915  | 1.86 | 0.678 | 0    |
| 402 | SHQ1         | SHQ1 homolog                                                                             | 7.09167E-05 | 0.00358915  | 0.38 | 0.676 | 0    |
| 403 | GALM         | galactose mutarotase (aldose 1-epimerase)                                                | 7.16655E-05 | 0.003602155 | 3.41 | 0.648 | 0    |
| 404 | VENTX        | VENT homeobox homolog                                                                    | 7.16021E-05 | 0.003602155 | 1.75 | 0.696 | 0    |
| 405 | ATL1         | atlastin GTPase 1                                                                        | 7.17596E-05 | 0.003602155 | 0.60 | 0.647 | 0    |
| 406 | MALL         | mal, T-cell differentiation protein-like                                                 | 7.23711E-05 | 0.003615404 | 1.54 | 0.689 | 0    |
| 407 | PKN2         | protein kinase N2                                                                        | 7.23792E-05 | 0.003615404 | 0.53 | 0.699 | 0    |
| 408 | PDZK1IP1     | PDZK1 interacting protein 1                                                              | 7.35631E-05 | 0.003656573 | 1.60 | 0.682 | 0    |
| 409 | LOC729040    | hypothetical LOC729040                                                                   | 7.35498E-05 | 0.003656573 | 1.55 | 0.661 | 0    |
| 410 | TMEM107      | transmembrane protein 107                                                                | 7.42695E-05 | 0.003682682 | 0.06 | 0.680 | 0    |
| 411 | TUBB3        | tubulin, beta 3                                                                          | 7.53284E-05 | 0.003717054 | 1.44 | 0.684 | 0    |
| 412 | HIC1         | hypermethylated in cancer 1                                                              | 7.52797E-05 | 0.003717054 | 1.74 | 0.660 | 0    |
| 413 | BCL3         | B-cell CLL/lymphoma 3                                                                    | 7.61682E-05 | 0.003749395 | 2.18 | 0.674 | 0    |
| 414 | AXL          | AXL receptor tyrosine kinase                                                             | 7.70072E-05 | 0.003781539 | 0.60 | 0.657 | 0    |
| 415 | ASGR2        | asialoglycoprotein receptor 2                                                            | 7.76713E-05 | 0.003804958 | 1.46 | 0.667 | 0    |
| 416 | RTN3         | reticulon 3                                                                              | 7.81058E-05 | 0.003817045 | 0.46 | 0.651 | 0    |
| 417 | PHLDA3       | pleckstrin homology-like domain, family A, member 3                                      | 7.92432E-05 | 0.003863345 | 0.66 | 0.681 | 0    |
| 418 | NLRP6        | NLR family, pyrin domain containing 6                                                    | 8.42153E-05 | 0.004095927 | 1.81 | 0.653 | 0.01 |
| 419 | FERMT1       | fermitin family homolog 1                                                                | 8.50126E-05 | 0.004124834 | 1.93 | 0.684 | 0    |
| 420 | SULF2        | sulfatase 2                                                                              | 8.66136E-05 | 0.00418255  | 1.53 | 0.676 | 0    |
| 421 | MOGAT1       | monoacylglycerol O-acyltransferase 1                                                     | 8.64988E-05 | 0.00418255  | 0.72 | 0.653 | 0    |



|     |           |                                                                                   |             |             |      |       |      |
|-----|-----------|-----------------------------------------------------------------------------------|-------------|-------------|------|-------|------|
| 422 | PRODH     | proline dehydrogenase (oxidase) 1                                                 | 8.81372E-05 | 0.004246041 | 1.77 | 0.674 | 0    |
| 423 | PERP      | PERP, TP53 apoptosis effector                                                     | 8.84171E-05 | 0.004249453 | 1.61 | 0.707 | 0    |
| 424 | ORSF1     | olfactory receptor, family 5, subfamily F, member 1                               | 9.021E-05   | 0.004325401 | 0.42 | 0.665 | 0    |
| 425 | PTEN      | phosphatase and tensin homolog                                                    | 9.15451E-05 | 0.004379085 | 3.68 | 0.669 | 0    |
| 426 | TUSC3     | tumor suppressor candidate 3                                                      | 9.20431E-05 | 0.004392574 | 2.03 | 0.661 | 0    |
| 427 | LILRA3    | leukocyte immunoglobulin-like receptor, subfamily A (without TM domain), member 3 | 9.24713E-05 | 0.004402675 | 2.01 | 0.655 | 0    |
| 428 | NOTCH3    | Notch homolog 3                                                                   | 9.28344E-05 | 0.004405319 | 1.93 | 0.673 | 0    |
| 429 | LBR       | lamin B receptor                                                                  | 9.29602E-05 | 0.004405319 | 2.30 | 0.674 | 0    |
| 430 | PBLD      | phenazine biosynthesis-like protein domain containing                             | 9.42122E-05 | 0.004435263 | 0.45 | 0.666 | 0.01 |
| 431 | MRPL49    | mitochondrial ribosomal protein L49                                               | 9.41747E-05 | 0.004435263 | 0.07 | 0.668 | 0    |
| 432 | LEP       | leptin                                                                            | 9.42466E-05 | 0.004435263 | 1.79 | 0.681 | 0    |
| 433 | PHC2      | polyhomeotic homolog 2                                                            | 9.5298E-05  | 0.004466215 | 3.43 | 0.676 | 0    |
| 434 | STARD7    | StAR-related lipid transfer (START) domain containing 7                           | 9.55634E-05 | 0.004466215 | 0.17 | 0.641 | 0    |
| 435 | CLDN3     | claudin 3                                                                         | 9.54944E-05 | 0.004466215 | 1.46 | 0.675 | 0    |
| 436 | SRGAP1    | SLIT-ROBO Rho GTPase activating protein 1                                         | 9.65371E-05 | 0.004482609 | 1.93 | 0.702 | 0.01 |
| 437 | DSP       | desmoplakin                                                                       | 9.63708E-05 | 0.004482609 | 1.54 | 0.654 | 0    |
| 438 | PPP1R14C  | protein phosphatase 1, regulatory (inhibitor) subunit 14C                         | 9.65756E-05 | 0.004482609 | 1.58 | 0.682 | 0    |
| 439 | HSPA4     | heat shock 70kDa protein 4                                                        | 9.89049E-05 | 0.004580265 | 6.24 | 0.654 | 0    |
| 440 | CXCR4     | chemokine (C-X-C motif) receptor 4                                                | 0.000100242 | 0.004629405 | 1.91 | 0.670 | 0    |
| 441 | MPZL2     | myelin protein zero-like 2                                                        | 0.000100421 | 0.004629405 | 0.43 | 0.629 | 0    |
| 442 | MT1X      | metallothionein 1X                                                                | 0.000100966 | 0.004643214 | 2.52 | 0.645 | 0    |
| 443 | C20orf96  | chromosome 20 open reading frame 96                                               | 0.000101178 | 0.004643214 | 0.51 | 0.671 | 0    |
| 444 | TRIM7     | tripartite motif-containing 7                                                     | 0.000102908 | 0.004711999 | 2.03 | 0.679 | 0    |
| 445 | FRMD4B    | FERM domain containing 4B                                                         | 0.000104751 | 0.00475512  | 3.76 | 0.685 | 0    |
| 446 | OAF       | OAF homolog                                                                       | 0.00010557  | 0.00475512  | 1.58 | 0.674 | 0    |
| 447 | MAPK13    | mitogen-activated protein kinase 13                                               | 0.000105369 | 0.00475512  | 2.97 | 0.663 | 0    |
| 448 | FAM65B    | family with sequence similarity 65, member B                                      | 0.000104423 | 0.00475512  | 1.47 | 0.673 | 0    |
| 449 | IFITM2    | interferon induced transmembrane protein 2 (1-8D)                                 | 0.000104147 | 0.00475512  | 1.88 | 0.660 | 0    |
| 450 | CYSLTR1   | cysteinyl leukotriene receptor 1                                                  | 0.000105807 | 0.00475512  | 0.39 | 0.682 | 0    |
| 451 | LOC440335 | hypothetical LOC440335                                                            | 0.000106189 | 0.00475512  | 1.53 | 0.673 | 0    |
| 452 | PCDH12    | protocadherin 12                                                                  | 0.000105092 | 0.00475512  | 2.17 | 0.648 | 0    |
| 453 | MYL6B     | myosin, light chain 6B, alkali, smooth muscle and non-muscle                      | 0.000105525 | 0.00475512  | 4.74 | 0.672 | 0    |
| 454 | SMAD4     | SMAD family member 4                                                              | 0.000106097 | 0.00475512  | 0.26 | 0.680 | 0    |
| 455 | PON3      | paraoxonase 3                                                                     | 0.000106883 | 0.004775668 | 1.79 | 0.662 | 0    |
| 456 | SAT1      | spermidine/spermine N1-acetyltransferase 1                                        | 0.000107529 | 0.004794002 | 4.89 | 0.661 | 0    |
| 457 | DCUN1D3   | DCN1, defective in cullin neddylation 1, domain containing 3                      | 0.000109196 | 0.004857662 | 6.11 | 0.663 | 0    |
| 458 | FOXQ1     | forkhead box Q1                                                                   | 0.000110141 | 0.004889013 | 1.55 | 0.670 | 0    |
| 459 | PTS       | 6-pyruvoyltetrahydropterin synthase                                               | 0.000110618 | 0.004899477 | 6.88 | 0.671 | 0    |
| 460 | GPRIN2    | G protein regulated inducer of neurite outgrowth 2                                | 0.000110917 | 0.004902055 | 1.76 | 0.644 | 0    |
| 461 | FIG4      | FIG4 homolog, SAC1 lipid phosphatase domain containing                            | 0.000111464 | 0.004915546 | 0.38 | 0.650 | 0    |
| 462 | KIF1B     | kinesin family member 1B                                                          | 0.000112497 | 0.004939676 | 4.23 | 0.672 | 0    |
| 463 | CGN       | cingulin                                                                          | 0.000112309 | 0.004939676 | 1.52 | 0.654 | 0    |
| 464 | SNN       | stannin                                                                           | 0.000113578 | 0.004976401 | 2.62 | 0.667 | 0    |
| 465 | NTNG2     | netrin G2                                                                         | 0.000114493 | 0.005005687 | 1.76 | 0.663 | 0    |
| 466 | PIGY      | phosphatidylinositol glycan anchor biosynthesis, class Y                          | 0.000114756 | 0.005006405 | 0.31 | 0.663 | 0    |
| 467 | PI3       | peptidase inhibitor 3, skin-derived                                               | 0.000115273 | 0.005018206 | 1.45 | 0.680 | 0    |
| 468 | TIMP4     | TIMP metallopeptidase inhibitor 4                                                 | 0.000117956 | 0.005117366 | 1.64 | 0.672 | 0    |
| 469 | BCL2L15   | BCL2-like 15                                                                      | 0.00011848  | 0.005117366 | 0.44 | 0.705 | 0    |
| 470 | KRT6A     | keratin 6A                                                                        | 0.000118558 | 0.005117366 | 1.82 | 0.642 | 0    |
| 471 | HTR7      | 5-hydroxytryptamine                                                               | 0.00011819  | 0.005117366 | 3.91 | 0.677 | 0    |
| 472 | NR2F2     | nuclear receptor subfamily 2, group F, member 2                                   | 0.000119397 | 0.005133264 | 1.86 | 0.657 | 0.01 |
| 473 | S1PR2     | sphingosine-1-phosphate receptor 2                                                | 0.000119431 | 0.005133264 | 3.24 | 0.671 | 0    |
| 474 | DBR1      | debranching enzyme homolog 1                                                      | 0.000120647 | 0.005174568 | 0.45 | 0.660 | 0    |
| 475 | GPD1      | glycerol-3-phosphate dehydrogenase 1                                              | 0.000121103 | 0.005183196 | 0.70 | 0.654 | 0    |
| 476 | MSRB3     | methionine sulfoxide reductase B3                                                 | 0.000121658 | 0.005196043 | 2.35 | 0.633 | 0    |
| 477 | CIB1      | calcium and integrin binding 1                                                    | 0.00012253  | 0.005216959 | 0.15 | 0.689 | 0    |
| 478 | NOL3      | nucleolar protein 3 (apoptosis repressor with CARD domain)                        | 0.000122661 | 0.005216959 | 2.24 | 0.683 | 0    |
| 479 | TPD52L2   | tumor protein D52-like 2                                                          | 0.00012404  | 0.005264596 | 3.37 | 0.669 | 0    |
| 480 | MMP7      | matrix metallopeptidase 7 (matrilysin, uterine)                                   | 0.000124331 | 0.005265934 | 1.40 | 0.706 | 0    |
| 481 | SPNS2     | spinster homolog 2                                                                | 0.000125317 | 0.005296647 | 1.88 | 0.663 | 0    |
| 482 | ADAMT57   | ADAM metallopeptidase with thrombospondin type 1 motif, 7                         | 0.000126267 | 0.005325734 | 0.54 | 0.633 | 0    |

|     |              |                                                                                           |             |             |       |       |      |
|-----|--------------|-------------------------------------------------------------------------------------------|-------------|-------------|-------|-------|------|
| 483 | SLC26A9      | solute carrier family 26, member 9                                                        | 0.00012653  | 0.005325782 | 2.03  | 0.639 | 0    |
| 484 | NFKBIA       | nuclear factor of kappa light polypeptide gene enhancer in B-cells inhibitor, alpha       | 0.000126894 | 0.005330061 | 2.64  | 0.657 | 0    |
| 485 | TMEM132A     | transmembrane protein 132A                                                                | 0.000127583 | 0.005347964 | 1.81  | 0.682 | 0    |
| 486 | PRCD         | progressive rod-cone degeneration                                                         | 0.000128222 | 0.005363706 | 0.41  | 0.660 | 0    |
| 487 | C6orf47      | chromosome 6 open reading frame 47                                                        | 0.000128571 | 0.005367258 | 0.35  | 0.638 | 0    |
| 488 | C19orf33     | chromosome 19 open reading frame 33                                                       | 0.000129899 | 0.005411585 | 1.80  | 0.671 | 0    |
| 489 | DNAH5        | dynein, axonemal, heavy chain 5                                                           | 0.000130295 | 0.005416974 | 1.93  | 0.633 | 0    |
| 490 | IL1RN        | interleukin 1 receptor antagonist                                                         | 0.000131642 | 0.005445567 | 2.40  | 0.676 | 0    |
| 491 | ASAP2        | ArfGAP with SH3 domain, ankyrin repeat and PH domain 2                                    | 0.000131786 | 0.005445567 | 1.79  | 0.655 | 0    |
| 492 | DGKD         | diacylglycerol kinase, delta 130kDa                                                       | 0.000131738 | 0.005445567 | 2.00  | 0.665 | 0    |
| 493 | PLK3         | polo-like kinase 3                                                                        | 0.000135638 | 0.005593367 | 3.26  | 0.679 | 0    |
| 494 | APCDD1       | adenomatosis polyposis coli down-regulated 1                                              | 0.000137224 | 0.0056473   | 1.84  | 0.650 | 0    |
| 495 | LY6E         | lymphocyte antigen 6 complex, locus E                                                     | 0.000137806 | 0.005658479 | 0.46  | 0.657 | 0    |
| 496 | RAB21        | RAB21, member RAS oncogene family                                                         | 0.000138052 | 0.005658479 | 13.04 | 0.653 | 0    |
| 497 | MAP1LC3B     | microtubule-associated protein 1 light chain 3 beta                                       | 0.000138961 | 0.005684261 | 7.56  | 0.663 | 0    |
| 498 | OLFML2B      | olfactomedin-like 2B                                                                      | 0.000139421 | 0.005687297 | 2.24  | 0.663 | 0    |
| 499 | UBXN8        | UBX domain protein 8                                                                      | 0.000139595 | 0.005687297 | 5.22  | 0.662 | 0    |
| 500 | TTYH3        | tweety homolog 3                                                                          | 0.000140301 | 0.005693247 | 2.51  | 0.651 | 0    |
| 501 | ABHD5        | abhydrolase domain containing 5                                                           | 0.00014021  | 0.005693247 | 0.43  | 0.658 | 0    |
| 502 | MGC4473      | hypothetical LOC79100                                                                     | 0.000141132 | 0.005704218 | 0.42  | 0.684 | 0    |
| 503 | IFITM4P      | interferon induced transmembrane protein 4 pseudogene                                     | 0.000140874 | 0.005704218 | 1.83  | 0.662 | 0    |
| 504 | AQP9         | aquaporin 9                                                                               | 0.00014155  | 0.005709756 | 4.09  | 0.682 | 0    |
| 505 | BPHL         | biphenyl hydrolase-like                                                                   | 0.000142344 | 0.005730414 | 0.34  | 0.672 | 0    |
| 506 | CCBL2        | cysteine conjugate-beta lyase 2                                                           | 0.00014478  | 0.005816952 | 0.26  | 0.658 | 0    |
| 507 | POGZ         | pogo transposable element with ZNF domain                                                 | 0.00014627  | 0.00586521  | 0.38  | 0.653 | 0    |
| 508 | GPA33        | glycoprotein A33                                                                          | 0.00014777  | 0.005913695 | 0.58  | 0.670 | 0.01 |
| 509 | B3GNT8       | UDP-GlcNAc:betaGal beta-1,3-N-acetylglucosaminyltransferase 8                             | 0.000153685 | 0.00613835  | 2.07  | 0.679 | 0    |
| 510 | CACNA1G      | calcium channel, voltage-dependent, T type, alpha 1G                                      | 0.000155748 | 0.006156778 | 1.74  | 0.693 | 0.01 |
| 511 | LOC100130506 | hypothetical LOC100130506                                                                 | 0.000155418 | 0.006156778 | 0.63  | 0.668 | 0    |
| 512 | STAC3        | SH3 and cysteine rich domain 3                                                            | 0.000154717 | 0.006156778 | 0.27  | 0.656 | 0    |
| 513 | FHL1         | four and a half LIM domains 1                                                             | 0.000155443 | 0.006156778 | 0.42  | 0.672 | 0    |
| 514 | PPAPDC1B     | phosphatidic acid phosphatase type 2 domain containing 1B                                 | 0.000155692 | 0.006156778 | 9.74  | 0.676 | 0    |
| 515 | LOC100240734 | hypothetical LOC100240734                                                                 | 0.000155964 | 0.006156778 | 2.71  | 0.625 | 0    |
| 516 | TNFRSF10D    | tumor necrosis factor receptor superfamily, member 10d, decoy with truncated death domain | 0.000156659 | 0.006172224 | 2.93  | 0.681 | 0    |
| 517 | BCAT1        | branched chain aminotransferase 1, cytosolic                                              | 0.000157833 | 0.006206453 | 2.61  | 0.671 | 0    |
| 518 | UBQLN2       | ubiquilin 2                                                                               | 0.000164554 | 0.006436091 | 6.79  | 0.675 | 0    |
| 519 | ASRGL1       | asparaginase like 1                                                                       | 0.000164577 | 0.006436091 | 0.26  | 0.665 | 0    |
| 520 | PTPLAD2      | protein tyrosine phosphatase-like A domain containing 2                                   | 0.000164622 | 0.006436091 | 0.21  | 0.658 | 0    |
| 521 | ZNF445       | zinc finger protein 445                                                                   | 0.000166397 | 0.006492986 | 2.70  | 0.645 | 0    |
| 522 | KCNA3        | potassium voltage-gated channel, shaker-related subfamily, member 3                       | 0.000167156 | 0.006510105 | 0.28  | 0.674 | 0    |
| 523 | SLC37A3      | solute carrier family 37 member 3                                                         | 0.000167922 | 0.00652743  | 1.54  | 0.686 | 0    |
| 524 | SNRPA1       | small nuclear ribonucleoprotein polypeptide A'                                            | 0.000169699 | 0.006583915 | 6.57  | 0.663 | 0    |
| 525 | FAM129B      | family with sequence similarity 129, member B                                             | 0.00017143  | 0.006625801 | 3.11  | 0.679 | 0    |
| 526 | HNRNPD       | heterogeneous nuclear ribonucleoprotein D                                                 | 0.000171141 | 0.006625801 | 4.14  | 0.648 | 0    |
| 527 | SIRPD        | signal-regulatory protein delta                                                           | 0.000174549 | 0.006733534 | 0.40  | 0.669 | 0    |
| 528 | ZNF703       | zinc finger protein 703                                                                   | 0.000176928 | 0.006812396 | 1.68  | 0.643 | 0    |
| 529 | FBXO25       | F-box protein 25                                                                          | 0.000178919 | 0.006876055 | 0.07  | 0.665 | 0    |
| 530 | FBXL17       | F-box and leucine-rich repeat protein 17                                                  | 0.000180007 | 0.006904779 | 0.35  | 0.676 | 0    |
| 531 | MT1H         | metallothionein 1H                                                                        | 0.000180559 | 0.006912911 | 2.47  | 0.648 | 0    |
| 532 | ABCB4        | ATP-binding cassette, sub-family B                                                        | 0.000181824 | 0.006916909 | 1.82  | 0.667 | 0.01 |
| 533 | HLA-DPB2     | major histocompatibility complex, class II, DP beta 2                                     | 0.000182114 | 0.006916909 | 0.37  | 0.695 | 0    |
| 534 | NGLY1        | N-glycanase 1                                                                             | 0.000182364 | 0.006916909 | 6.72  | 0.667 | 0    |
| 535 | CD5L         | CD5 molecule-like                                                                         | 0.00018171  | 0.006916909 | 0.71  | 0.647 | 0    |
| 536 | ZNF542       | zinc finger protein 542                                                                   | 0.000181785 | 0.006916909 | 0.34  | 0.671 | 0    |
| 537 | CSF3         | colony stimulating factor 3                                                               | 0.000185357 | 0.006950684 | 1.85  | 0.627 | 0.02 |
| 538 | ST8SIA4      | ST8 alpha-N-acetylneuraminide alpha-2,8-sialyltransferase 4                               | 0.000184581 | 0.006950684 | 1.75  | 0.659 | 0    |
| 539 | C5orf30      | chromosome 5 open reading frame 30                                                        | 0.000184679 | 0.006950684 | 2.88  | 0.676 | 0    |
| 540 | CYYR1        | cysteine/tyrosine-rich 1                                                                  | 0.000183602 | 0.006950684 | 1.75  | 0.618 | 0    |
| 541 | CTPS         | CTP synthase                                                                              | 0.000184181 | 0.006950684 | 4.85  | 0.688 | 0    |
| 542 | LOC729799    | SEC14-like 1 pseudogene                                                                   | 0.000184982 | 0.006950684 | 3.61  | 0.656 | 0    |
| 543 | RPS6KA5      | ribosomal protein S6 kinase, 90kDa, polypeptide 5                                         | 0.000185648 | 0.006950684 | 0.24  | 0.665 | 0    |

|     |              |                                                                                    |             |             |       |       |      |
|-----|--------------|------------------------------------------------------------------------------------|-------------|-------------|-------|-------|------|
| 544 | BLM          | Bloom syndrome, RecQ helicase-like                                                 | 0.000186765 | 0.006962801 | 1.99  | 0.691 | 0.01 |
| 545 | LARP1B       | La ribonucleoprotein domain family, member 1B                                      | 0.000186604 | 0.006962801 | 4.38  | 0.658 | 0    |
| 546 | REM2         | RAS (RAD and GEM)-like GTP binding 2                                               | 0.000186999 | 0.006962801 | 1.63  | 0.669 | 0    |
| 547 | GRB10        | growth factor receptor-bound protein 10                                            | 0.000188183 | 0.006979496 | 2.38  | 0.666 | 0    |
| 548 | MME          | membrane metallo-endopeptidase                                                     | 0.000187881 | 0.006979496 | 0.70  | 0.647 | 0    |
| 549 | CAMSAP1      | calmodulin regulated spectrin-associated protein 1                                 | 0.000188477 | 0.006979496 | 0.44  | 0.667 | 0    |
| 550 | ARAP3        | ArfGAP with RhoGAP domain, ankyrin repeat and PH domain 2                          | 0.000189908 | 0.007012813 | 1.78  | 0.691 | 0    |
| 551 | ZNF658       | zinc finger protein 658                                                            | 0.000190067 | 0.007012813 | 0.37  | 0.694 | 0    |
| 552 | COL18A1      | collagen, type XVIII, alpha 1                                                      | 0.000196072 | 0.00722129  | 1.86  | 0.667 | 0    |
| 553 | DDR1         | discoidin domain receptor tyrosine kinase 1                                        | 0.00019675  | 0.007233147 | 1.93  | 0.686 | 0    |
| 554 | CCL8         | chemokine (CC motif) ligand 8                                                      | 0.000201674 | 0.007387452 | 1.30  | 0.672 | 0    |
| 555 | PCMT1        | protein-L-isoaspartate (D-aspartate) O-methyltransferase                           | 0.000201133 | 0.007387452 | 0.17  | 0.665 | 0    |
| 556 | OLIG1        | oligodendrocyte transcription factor 1                                             | 0.000203533 | 0.007428788 | 1.38  | 0.680 | 0    |
| 557 | DUSP14       | dual specificity phosphatase 14                                                    | 0.000203286 | 0.007428788 | 2.40  | 0.675 | 0    |
| 558 | WDR63        | WD repeat domain 63                                                                | 0.000204964 | 0.007467578 | 1.97  | 0.662 | 0    |
| 559 | SLC46A3      | solute carrier family 46, member 3                                                 | 0.000207518 | 0.00754713  | 0.42  | 0.684 | 0    |
| 560 | FAM162A      | family with sequence similarity 162, member A                                      | 0.000208066 | 0.007553535 | 0.18  | 0.660 | 0    |
| 561 | DEXI         | Dexi homolog                                                                       | 0.000214953 | 0.007789661 | 2.59  | 0.668 | 0    |
| 562 | SMAD3        | SMAD family member 3                                                               | 0.000216751 | 0.007840828 | 1.48  | 0.680 | 0    |
| 563 | KRTAP9L1     | Putative keratin-associated protein 9-2-like 1                                     | 0.000220148 | 0.007949556 | 0.47  | 0.656 | 0    |
| 564 | FAM89A       | family with sequence similarity 89, member A                                       | 0.000220545 | 0.007949789 | 0.57  | 0.655 | 0    |
| 565 | MEX3C        | mex-3 homolog C                                                                    | 0.000221049 | 0.007953854 | 1.98  | 0.676 | 0    |
| 566 | JUB          | jub, ajuba homolog                                                                 | 0.00022209  | 0.007977194 | 1.88  | 0.622 | 0    |
| 567 | MMP8         | matrix metalloproteinase 8                                                         | 0.00022254  | 0.007979246 | 2.27  | 0.617 | 0    |
| 568 | LOC100129363 | cDNA FLJ46623 fis, clone TLUNG2001810.                                             | 0.000224191 | 0.008010185 | 1.81  | 0.671 | 0    |
| 569 | EIF2C2       | eukaryotic translation initiation factor 2C, 2                                     | 0.000224026 | 0.008010185 | 6.10  | 0.665 | 0    |
| 570 | CDRT4        | CMT1A duplicated region transcript 4                                               | 0.000225846 | 0.00804569  | 0.51  | 0.671 | 0.01 |
| 571 | NFU1         | NFU1 iron-sulfur cluster scaffold homolog                                          | 0.000225976 | 0.00804569  | 0.16  | 0.680 | 0    |
| 572 | DENND3       | DENN/MADD domain containing 3                                                      | 0.000226392 | 0.008046413 | 2.64  | 0.664 | 0    |
| 573 | RAB34        | RAB34, member RAS oncogene family                                                  | 0.000228511 | 0.008107549 | 0.34  | 0.663 | 0    |
| 574 | CKB          | creatine kinase, brain                                                             | 0.000229405 | 0.00811817  | 1.69  | 0.676 | 0    |
| 575 | FHOD1        | formin homology 2 domain containing 1                                              | 0.000229609 | 0.00811817  | 3.83  | 0.676 | 0    |
| 576 | AQP4         | aquaporin 4                                                                        | 0.000230654 | 0.008131424 | 1.41  | 0.684 | 0.01 |
| 577 | VRK2         | vaccinia related kinase 2                                                          | 0.000230784 | 0.008131424 | 0.44  | 0.680 | 0    |
| 578 | LOC541472    | hypothetical LOC541472                                                             | 0.000232476 | 0.008176886 | 2.13  | 0.641 | 0    |
| 579 | AMICA1       | adhesion molecule, interacts with CXADR antigen 1                                  | 0.000234522 | 0.008234607 | 0.31  | 0.671 | 0    |
| 580 | E2F3         | E2F transcription factor 3                                                         | 0.000235908 | 0.008268967 | 2.64  | 0.649 | 0    |
| 581 | PLBD1        | phospholipase B domain containing 1                                                | 0.00023654  | 0.008276867 | 0.28  | 0.665 | 0    |
| 582 | BCAS1        | breast carcinoma amplified sequence 1                                              | 0.00023699  | 0.008278368 | 1.74  | 0.649 | 0    |
| 583 | CCL3         | chemokine (C-C motif) ligand 3                                                     | 0.000238327 | 0.008288119 | 1.66  | 0.657 | 0    |
| 584 | IQSEC3       | IQ motif and Sec7 domain 3                                                         | 0.000238492 | 0.008288119 | 0.70  | 0.642 | 0    |
| 585 | ECHDC3       | enoyl Coenzyme A hydratase domain containing 3                                     | 0.000238077 | 0.008288119 | 0.51  | 0.635 | 0    |
| 586 | C1orf133     | chromosome 1 open reading frame 133                                                | 0.000239696 | 0.008315744 | 1.92  | 0.620 | 0    |
| 587 | GATA1        | GATA binding protein 1                                                             | 0.000242959 | 0.008402737 | 1.77  | 0.662 | 0    |
| 588 | LCE1D        | late cornified envelope 1D                                                         | 0.00024303  | 0.008402737 | 0.53  | 0.630 | 0    |
| 589 | CYP4F2       | cytochrome P450, family 4, subfamily F, polypeptide 2                              | 0.000243566 | 0.008406948 | 3.11  | 0.628 | 0    |
| 590 | DACH1        | dachshund homolog 1                                                                | 0.000244197 | 0.008414437 | 1.58  | 0.684 | 0    |
| 591 | NTSR1        | neurotensin receptor 1                                                             | 0.000247237 | 0.008504789 | 1.64  | 0.650 | 0    |
| 592 | AMIGO2       | adhesion molecule with Ig-like domain 2                                            | 0.000248723 | 0.008541457 | 0.56  | 0.650 | 0    |
| 593 | SLC25A23     | solute carrier family 25 (mitochondrial carrier; phosphate carrier), member 23     | 0.000249162 | 0.008542101 | 1.47  | 0.678 | 0    |
| 594 | MIDN         | midnolin                                                                           | 0.000250561 | 0.008575608 | 3.77  | 0.676 | 0    |
| 595 | STX8         | syntaxin 8                                                                         | 0.000253954 | 0.00867713  | 0.27  | 0.664 | 0    |
| 596 | CYTL1        | cytokine-like 1                                                                    | 0.000255323 | 0.008679134 | 1.82  | 0.705 | 0.01 |
| 597 | GALNT3       | UDP-N-acetyl-alpha-D-galactosamine:polypeptide N-acetylgalactosaminyltransferase 3 | 0.000255566 | 0.008679134 | 1.75  | 0.649 | 0    |
| 598 | MFSD6L       | major facilitator superfamily domain containing 6-like                             | 0.000256148 | 0.008679134 | 1.75  | 0.670 | 0    |
| 599 | ZNF20        | zinc finger protein 20                                                             | 0.000254928 | 0.008679134 | 0.40  | 0.683 | 0    |
| 600 | TSNARE1      | t-SNARE domain containing 1                                                        | 0.000256007 | 0.008679134 | 0.25  | 0.670 | 0    |
| 601 | CALR         | calreticulin                                                                       | 0.000258983 | 0.008760613 | 10.52 | 0.663 | 0    |
| 602 | TIMM17A      | translocase of inner mitochondrial membrane 17 homolog A                           | 0.000262607 | 0.008868432 | 10.37 | 0.645 | 0    |
| 603 | OSM          | oncostatin M                                                                       | 0.000263916 | 0.008897858 | 1.90  | 0.660 | 0    |
| 604 | ECE1         | endothelin converting enzyme 1                                                     | 0.00026496  | 0.008918282 | 1.63  | 0.681 | 0    |

|     |           |                                                                               |             |             |       |       |      |
|-----|-----------|-------------------------------------------------------------------------------|-------------|-------------|-------|-------|------|
| 605 | METRNL    | meteorin, glial cell differentiation regulator-like                           | 0.000267771 | 0.008997977 | 4.01  | 0.662 | 0    |
| 606 | CRLF1     | cytokine receptor-like factor 1                                               | 0.000269619 | 0.009045137 | 1.96  | 0.662 | 0    |
| 607 | STAMBP    | STAM binding protein                                                          | 0.000270305 | 0.009053216 | 0.32  | 0.654 | 0    |
| 608 | CHKA      | choline kinase alpha                                                          | 0.000271012 | 0.009061964 | 3.48  | 0.683 | 0    |
| 609 | CEP135    | centrosomal protein 135kDa                                                    | 0.000276026 | 0.009199673 | 2.42  | 0.654 | 0    |
| 610 | CCL3L3    | chemokine (C-C motif) ligand 3-like 3                                         | 0.000276035 | 0.009199673 | 1.58  | 0.655 | 0    |
| 611 | KRT24     | keratin 24                                                                    | 0.000279188 | 0.009289514 | 4.05  | 0.638 | 0    |
| 612 | LRP8      | low density lipoprotein receptor-related protein 8, apolipoprotein e receptor | 0.000281076 | 0.009337047 | 2.57  | 0.673 | 0    |
| 613 | FBRSL1    | fibrosin-like 1                                                               | 0.000283355 | 0.009397407 | 0.63  | 0.631 | 0    |
| 614 | LGMN      | legumain                                                                      | 0.000288283 | 0.009545275 | 1.81  | 0.664 | 0.02 |
| 615 | ZNF595    | zinc finger protein 595                                                       | 0.00028921  | 0.009560403 | 0.35  | 0.675 | 0    |
| 616 | ZFP36     | zinc finger protein 36, C3H type, homolog                                     | 0.000290307 | 0.009581073 | 2.21  | 0.675 | 0    |
| 617 | RPL6      | ribosomal protein L6                                                          | 0.000291301 | 0.009587538 | 6.31  | 0.666 | 0    |
| 618 | USP33     | ubiquitin specific peptidase 33                                               | 0.000291446 | 0.009587538 | 0.35  | 0.672 | 0    |
| 619 | ATP2B4    | ATPase, Ca++ transporting, plasma membrane 4                                  | 0.000292084 | 0.009593002 | 2.21  | 0.671 | 0    |
| 620 | DNAJB11   | DnaJ (Hsp40) homolog, subfamily B, member 11                                  | 0.000293172 | 0.009613188 | 6.53  | 0.693 | 0    |
| 621 | SIK2      | salt-inducible kinase 2                                                       | 0.000293802 | 0.009618355 | 0.40  | 0.642 | 0    |
| 622 | DUSP10    | dual specificity phosphatase 10                                               | 0.000295069 | 0.009644311 | 0.46  | 0.654 | 0    |
| 623 | C20orf106 | chromosome 20 open reading frame 106                                          | 0.000295796 | 0.009652537 | 3.37  | 0.654 | 0    |
| 624 | C5orf44   | chromosome 5 open reading frame 44                                            | 0.00029823  | 0.009716377 | 0.32  | 0.687 | 0    |
| 625 | MS4A6E    | membrane-spanning 4-domains, subfamily A, member 6E                           | 0.000300856 | 0.009776978 | 1.68  | 0.700 | 0    |
| 626 | TPSG1     | tryptase gamma 1                                                              | 0.000301052 | 0.009776978 | 0.47  | 0.633 | 0    |
| 627 | MST1R     | macrophage stimulating 1 receptor (c-met-related tyrosine kinase)             | 0.000303547 | 0.009842276 | 1.81  | 0.668 | 0    |
| 628 | WFIKKN2   | WAP, follistatin/kazal, immunoglobulin, kunitz and netrin domain containing 2 | 0.000305967 | 0.009873506 | 0.73  | 0.678 | 0    |
| 629 | LOC727721 | cDNA clone TRACH3034794 5'                                                    | 0.000305602 | 0.009873506 | 0.52  | 0.664 | 0    |
| 630 | CORO2A    | coronin, actin binding protein, 2A                                            | 0.000305069 | 0.009873506 | 0.39  | 0.630 | 0    |
| 631 | CMTM2     | CKLF-like MARVEL transmembrane domain containing 2                            | 0.000309017 | 0.009932269 | 1.64  | 0.667 | 0    |
| 632 | LOC286058 | cDNA DKFZp686J2011                                                            | 0.000309742 | 0.009932269 | 1.74  | 0.621 | 0    |
| 633 | ARHGAP6   | Rho GTPase activating protein 6                                               | 0.000308348 | 0.009932269 | 0.63  | 0.638 | 0    |
| 634 | PLD6      | phospholipase D family, member 6                                              | 0.000309437 | 0.009932269 | 1.80  | 0.682 | 0    |
| 635 | KIAA0247  | KIAA0247                                                                      | 0.000310372 | 0.009936796 | 6.99  | 0.660 | 0    |
| 636 | CYBRD1    | cytochrome b reductase 1                                                      | 0.000311876 | 0.009969249 | 2.09  | 0.659 | 0    |
| 637 | UTP11L    | UTP11-like, U3 small nucleolar ribonucleoprotein,                             | 0.000318454 | 0.010163539 | 6.64  | 0.650 | 0    |
| 638 | C17orf108 | chromosome 17 open reading frame 108                                          | 0.000320156 | 0.010201837 | 0.30  | 0.687 | 0    |
| 639 | GPRC5C    | G protein-coupled receptor, family C, group 5, member C                       | 0.000321086 | 0.010215454 | 2.38  | 0.668 | 0    |
| 640 | UBE2E2    | ubiquitin-conjugating enzyme E2E 2                                            | 0.000325685 | 0.010345591 | 0.31  | 0.645 | 0    |
| 641 | GGT5      | gamma-glutamyltransferase 5                                                   | 0.000327643 | 0.010390394 | 1.87  | 0.675 | 0    |
| 642 | EGR1      | early growth response 1                                                       | 0.000328118 | 0.010390394 | 1.88  | 0.677 | 0    |
| 643 | ANUBL1    | AN1, ubiquitin-like, homolog                                                  | 0.000330879 | 0.01046155  | 0.38  | 0.658 | 0    |
| 644 | SLC2A1    | solute carrier family 2                                                       | 0.000332501 | 0.010496485 | 1.81  | 0.668 | 0    |
| 645 | KLF10     | Kruppel-like factor 10                                                        | 0.000333422 | 0.010509244 | 4.06  | 0.672 | 0    |
| 646 | INE2      | inactivation escape 2                                                         | 0.000334525 | 0.010527695 | 2.03  | 0.615 | 0    |
| 647 | PTPN9     | protein tyrosine phosphatase, non-receptor type 9                             | 0.000339574 | 0.010653602 | 0.25  | 0.651 | 0    |
| 648 | NAALADL2  | N-acetylated alpha-linked acidic dipeptidase-like 2                           | 0.000339126 | 0.010653602 | 0.38  | 0.681 | 0    |
| 649 | SLC40A1   | solute carrier family 40 (iron-regulated transporter), member 1               | 0.000342699 | 0.010735081 | 1.75  | 0.673 | 0    |
| 650 | HS3ST2    | heparan sulfate (glucosamine) 3-O-sulfotransferase 2                          | 0.000343422 | 0.010741173 | 1.31  | 0.659 | 0    |
| 651 | H2AFB2    | H2A histone family, member B2                                                 | 0.000346583 | 0.010823411 | 0.46  | 0.676 | 0    |
| 652 | CDH1      | cadherin 1, type 1, E-cadherin                                                | 0.000349756 | 0.010905745 | 1.38  | 0.667 | 0.01 |
| 653 | ANKRD29   | ankyrin repeat domain 29                                                      | 0.000353035 | 0.010988388 | 2.13  | 0.665 | 0    |
| 654 | C12orf62  | chromosome 12 open reading frame 62                                           | 0.000353533 | 0.010988388 | 0.07  | 0.671 | 0    |
| 655 | SCG5      | secretogranin V                                                               | 0.000355109 | 0.010988388 | 1.50  | 0.620 | 0    |
| 656 | ITGA3     | integrin, alpha 3                                                             | 0.000355068 | 0.010988388 | 1.54  | 0.682 | 0    |
| 657 | ZNF181    | zinc finger protein 181                                                       | 0.000354466 | 0.010988388 | 0.34  | 0.664 | 0    |
| 658 | BEX4      | brain expressed, X-linked 4                                                   | 0.000356675 | 0.011020071 | 0.38  | 0.660 | 0    |
| 659 | LIMD1     | LIM domains containing 1                                                      | 0.000358401 | 0.011039845 | 3.03  | 0.652 | 0    |
| 660 | ACSBG2    | acyl-CoA synthetase bubblegum family member 2                                 | 0.000358364 | 0.011039845 | 0.49  | 0.670 | 0    |
| 661 | ADAMTSL3  | ADAMTS-like 3                                                                 | 0.000360592 | 0.011090538 | 12.64 | 0.578 | 0    |
| 662 | MAFB      | v-maf musculoaponeurotic fibrosarcoma oncogene homolog B                      | 0.000362816 | 0.011142054 | 3.42  | 0.660 | 0    |
| 663 | SHISA4    | shisa homolog 4                                                               | 0.00036566  | 0.011212478 | 0.41  | 0.673 | 0    |
| 664 | ADAMTS2   | ADAM metalloproteinase with thrombospondin type 1 motif, 2                    | 0.000366821 | 0.011231119 | 1.66  | 0.668 | 0    |
| 665 | ZNF385B   | zinc finger protein 385B                                                      | 0.00037225  | 0.011366232 | 5.43  | 0.643 | 0    |

|     |           |                                                                        |             |             |       |       |      |
|-----|-----------|------------------------------------------------------------------------|-------------|-------------|-------|-------|------|
| 666 | KLHL33    | kelch-like 33                                                          | 0.000372352 | 0.011366232 | 0.49  | 0.660 | 0    |
| 667 | UCP3      | uncoupling protein 3                                                   | 0.000373559 | 0.011385989 | 0.64  | 0.634 | 0    |
| 668 | EMP2      | epithelial membrane protein 2                                          | 0.00037425  | 0.011389972 | 1.66  | 0.658 | 0    |
| 669 | PRDM8     | PR domain containing 8                                                 | 0.000377085 | 0.01145911  | 1.49  | 0.674 | 0    |
| 670 | LSM1      | LSM1 homolog, U6 small nuclear RNA associated                          | 0.000381408 | 0.011573163 | 10.00 | 0.677 | 0    |
| 671 | ZNF28     | zinc finger protein 28                                                 | 0.000382189 | 0.011579583 | 0.32  | 0.672 | 0    |
| 672 | SLC16A4   | solute carrier family 16, member 4 (monocarboxylic acid transporter 5) | 0.000386097 | 0.011680583 | 1.83  | 0.668 | 0    |
| 673 | CDA       | cytidine deaminase                                                     | 0.000387493 | 0.011705388 | 1.76  | 0.673 | 0    |
| 674 | TTR       | transthyretin                                                          | 0.000390419 | 0.011741438 | 1.53  | 0.608 | 0    |
| 675 | ARHGAP12  | Rho GTPase activating protein 12                                       | 0.000390053 | 0.011741438 | 2.25  | 0.677 | 0    |
| 676 | NINJ1     | ninjurin 1                                                             | 0.000390384 | 0.011741438 | 1.87  | 0.647 | 0    |
| 677 | SKP2      | S-phase kinase-associated protein 2                                    | 0.000391511 | 0.011756898 | 0.44  | 0.633 | 0    |
| 678 | BNIP1     | BCL2/adenovirus E1B 19kD interacting protein like                      | 0.000392707 | 0.011775411 | 1.69  | 0.665 | 0    |
| 679 | KCNAB1    | potassium voltage-gated channel shaker-related subfamily beta member 1 | 0.000393659 | 0.011786573 | 0.73  | 0.659 | 0    |
| 680 | CAT       | catalase                                                               | 0.000394396 | 0.011791288 | 0.41  | 0.654 | 0    |
| 681 | ZC4H2     | zinc finger, C4H2 domain containing                                    | 0.000398038 | 0.01186748  | 0.44  | 0.663 | 0    |
| 682 | IL10      | interleukin 10                                                         | 0.000398112 | 0.01186748  | 1.77  | 0.677 | 0    |
| 683 | DNAJ5B    | DnaJ (Hsp40) homolog, subfamily C, member 5 beta                       | 0.000399542 | 0.011875283 | 0.64  | 0.669 | 0    |
| 684 | HNRNPCL1  | heterogeneous nuclear ribonucleoprotein C-like 1                       | 0.000399211 | 0.011875283 | 0.39  | 0.647 | 0    |
| 685 | LOC732160 | similar to NADH dehydrogenase                                          | 0.000404093 | 0.011975511 | 0.22  | 0.658 | 0    |
| 686 | YRDC      | yrnC domain containing                                                 | 0.000403793 | 0.011975511 | 4.34  | 0.662 | 0    |
| 687 | ACR       | acrosin                                                                | 0.000406044 | 0.012015834 | 0.51  | 0.693 | 0.02 |
| 688 | KREMEN1   | kringle containing transmembrane protein 1                             | 0.000408937 | 0.012082647 | 2.04  | 0.664 | 0    |
| 689 | KRT83     | keratin 83                                                             | 0.000410044 | 0.012082647 | 1.72  | 0.694 | 0    |
| 690 | HSPA6     | heat shock 70kDa protein 6                                             | 0.000410085 | 0.012082647 | 2.21  | 0.647 | 0    |
| 691 | P2RY2     | purinergic receptor P2Y, G-protein coupled, 2                          | 0.000411874 | 0.012117803 | 1.71  | 0.675 | 0    |
| 692 | PDSS1     | prenyl                                                                 | 0.000413855 | 0.012130926 | 4.98  | 0.672 | 0    |
| 693 | TNFRSF12A | tumor necrosis factor receptor superfamily, member 12A                 | 0.000413578 | 0.012130926 | 2.38  | 0.709 | 0    |
| 694 | IRX1      | iroquois homeobox 1                                                    | 0.00041411  | 0.012130926 | 1.94  | 0.617 | 0    |
| 695 | MPP1      | membrane protein, palmitoylated 1, 55kDa                               | 0.000416849 | 0.012193583 | 6.65  | 0.641 | 0    |
| 696 | BAIAP2L1  | BAI1-associated protein 2-like 1                                       | 0.000417947 | 0.012208128 | 1.72  | 0.633 | 0    |
| 697 | ABL2      | v-abl Abelson murine leukemia viral oncogene homolog 2                 | 0.000421487 | 0.012285202 | 3.57  | 0.684 | 0    |
| 698 | ZNF354C   | zinc finger protein 354C                                               | 0.000421794 | 0.012285202 | 0.54  | 0.676 | 0    |
| 699 | C5orf13   | chromosome 5 open reading frame 13                                     | 0.000424305 | 0.012306204 | 3.40  | 0.658 | 0    |
| 700 | HSPG2     | heparan sulfate proteoglycan 2                                         | 0.000424331 | 0.012306204 | 1.58  | 0.673 | 0    |
| 701 | TNFRSF8   | tumor necrosis factor receptor superfamily, member 8                   | 0.000424297 | 0.012306204 | 1.53  | 0.633 | 0    |
| 702 | LY86      | lymphocyte antigen 86                                                  | 0.000427059 | 0.012367683 | 0.47  | 0.641 | 0    |
| 703 | ST6GAL1   | ST6 beta-galactosamide alpha-2,6-sialyltransferase 1                   | 0.000431658 | 0.012418287 | 1.69  | 0.666 | 0    |
| 704 | CD244     | CD244 molecule, natural killer cell receptor 2B4                       | 0.000431777 | 0.012418287 | 1.46  | 0.670 | 0    |
| 705 | TINAGL1   | tubulointerstitial nephritis antigen-like 1                            | 0.000432472 | 0.012418287 | 0.64  | 0.626 | 0    |
| 706 | HHIP      | hedgehog interacting protein                                           | 0.000431825 | 0.012418287 | 1.96  | 0.638 | 0    |
| 707 | COQ2      | coenzyme Q2 homolog, prenyltransferase                                 | 0.00043199  | 0.012418287 | 0.37  | 0.638 | 0    |
| 708 | PSMG2     | proteasome (prosome, macropain) assembly chaperone 2                   | 0.000430021 | 0.012418287 | 0.27  | 0.666 | 0    |
| 709 | ABCA1     | ATP-binding cassette, sub-family A (ABC1), member 1                    | 0.000433123 | 0.01241945  | 1.91  | 0.678 | 0    |
| 710 | CCDC125   | coiled-coil domain containing 125                                      | 0.000433924 | 0.012424898 | 0.34  | 0.668 | 0    |
| 711 | CES1      | carboxylesterase 1                                                     | 0.000434577 | 0.012426091 | 0.64  | 0.656 | 0.02 |
| 712 | ANO6      | anoctamin 6                                                            | 0.000436033 | 0.012450202 | 3.19  | 0.665 | 0    |
| 713 | HPSE      | heparanase                                                             | 0.000437592 | 0.012477202 | 2.43  | 0.632 | 0    |
| 714 | DIABLO    | diablo homolog, nuclear gene encoding mitochondrial protein            | 0.000439337 | 0.012509407 | 0.55  | 0.622 | 0    |
| 715 | SLC9A9    | solute carrier family 9 (sodium/hydrogen exchanger), member 9          | 0.000443441 | 0.012599584 | 1.61  | 0.682 | 0    |
| 716 | LRRC8A    | leucine rich repeat containing 8 family, member A                      | 0.000443743 | 0.012599584 | 4.03  | 0.663 | 0    |
| 717 | ZNF226    | zinc finger protein 226                                                | 0.000444463 | 0.012602417 | 0.16  | 0.670 | 0    |
| 718 | SDS       | serine dehydratase                                                     | 0.000446574 | 0.012639899 | 1.46  | 0.662 | 0    |
| 719 | C8G       | complement component 8, gamma polypeptide                              | 0.000447028 | 0.012639899 | 0.40  | 0.648 | 0    |
| 720 | TST       | thiosulfate sulfurtransferase                                          | 0.000451217 | 0.012740609 | 0.30  | 0.636 | 0    |
| 721 | NLN       | neurolysin                                                             | 0.000453211 | 0.01275596  | 3.30  | 0.646 | 0    |
| 722 | PM20D2    | peptidase M20 domain containing 2                                      | 0.00045347  | 0.01275596  | 2.23  | 0.683 | 0    |
| 723 | ENTPD5    | ectonucleoside triphosphate diphosphohydrolase 5                       | 0.000453643 | 0.01275596  | 0.45  | 0.653 | 0    |
| 724 | CARD10    | caspase recruitment domain family, member 10                           | 0.000455229 | 0.012782879 | 1.66  | 0.669 | 0    |
| 725 | KDM1A     | lysine                                                                 | 0.000457932 | 0.012841044 | 0.39  | 0.642 | 0    |
| 726 | ITGB3     | integrin, beta 3 (platelet glycoprotein IIIa, antigen CD61)            | 0.000460646 | 0.012899349 | 1.49  | 0.688 | 0    |

|     |              |                                                                                        |             |             |      |       |      |
|-----|--------------|----------------------------------------------------------------------------------------|-------------|-------------|------|-------|------|
| 727 | PRDM1        | PR domain containing 1, with ZNF domain                                                | 0.000466613 | 0.01301476  | 1.52 | 0.672 | 0    |
| 728 | RBPMS        | RNA binding protein with multiple splicing                                             | 0.000466328 | 0.01301476  | 1.60 | 0.619 | 0    |
| 729 | CRYZL1       | crystallin, zeta (quinone reductase)-like 1                                            | 0.000466688 | 0.01301476  | 0.20 | 0.657 | 0    |
| 730 | NT5C3L       | 5'-nucleotidase, cytosolic III-like                                                    | 0.000468013 | 0.013033847 | 0.56 | 0.637 | 0.02 |
| 731 | TCTEX1D2     | Tctex1 domain containing 2                                                             | 0.000470173 | 0.013076095 | 2.03 | 0.661 | 0    |
| 732 | FAM184A      | family with sequence similarity 184, member A                                          | 0.000471947 | 0.013092371 | 1.86 | 0.649 | 0    |
| 733 | TRPM5        | transient receptor potential cation channel, subfamily M, member 5                     | 0.000472047 | 0.013092371 | 0.43 | 0.675 | 0    |
| 734 | ST6GALNAC3   | ST6 (alpha-N-acetyl-neuraminy-2,3-beta-galactosyl-1,3)-N-acetylgalactosaminide alpha-2 | 0.000480784 | 0.01331654  | 1.55 | 0.666 | 0.01 |
| 735 | GPR114       | G protein-coupled receptor 114                                                         | 0.000482632 | 0.013331397 | 1.51 | 0.644 | 0.07 |
| 736 | CNKSRI       | connector enhancer of kinase suppressor of Ras 1                                       | 0.000482007 | 0.013331397 | 1.62 | 0.652 | 0    |
| 737 | PGC          | progastriccin                                                                          | 0.0004837   | 0.013342768 | 1.76 | 0.661 | 0    |
| 738 | SNHG3        | small nucleolar RNA host gene 3                                                        | 0.000485521 | 0.013356754 | 2.29 | 0.674 | 0    |
| 739 | DDAH1        | dimethylarginine dimethylaminohydrolase 1                                              | 0.000485364 | 0.013356754 | 1.45 | 0.655 | 0    |
| 740 | ZNF419       | zinc finger protein 419                                                                | 0.000488177 | 0.013411666 | 0.47 | 0.638 | 0    |
| 741 | ZFP82        | zinc finger protein 82 homolog                                                         | 0.000489889 | 0.013424953 | 0.49 | 0.646 | 0    |
| 742 | METTL1       | methyltransferase like 1                                                               | 0.000490641 | 0.013424953 | 3.36 | 0.689 | 0    |
| 743 | SEZ6L2       | seizure related 6 homolog                                                              | 0.000490638 | 0.013424953 | 1.68 | 0.683 | 0    |
| 744 | FAM27A       | family with sequence similarity 27, member A                                           | 0.000495512 | 0.013540004 | 2.44 | 0.658 | 0    |
| 745 | FSTL3        | folliculin-like 3                                                                      | 0.000498793 | 0.013611345 | 2.52 | 0.679 | 0    |
| 746 | TNNI1        | troponin I type 1                                                                      | 0.000500361 | 0.013615491 | 0.31 | 0.680 | 0    |
| 747 | SPPL2B       | signal peptide peptidase-like 2B                                                       | 0.000500954 | 0.013615491 | 0.40 | 0.687 | 0    |
| 748 | FOXP1        | forkhead box P1                                                                        | 0.00050014  | 0.013615491 | 0.35 | 0.669 | 0    |
| 749 | SPRN         | shadow of prion protein homolog                                                        | 0.000505592 | 0.013704907 | 0.57 | 0.657 | 0    |
| 750 | TCEAL1       | transcription elongation factor A                                                      | 0.000505408 | 0.013704907 | 0.33 | 0.648 | 0    |
| 751 | CNR1         | cannabinoid receptor 1                                                                 | 0.000508969 | 0.013778095 | 4.63 | 0.637 | 0    |
| 752 | SLC22A17     | solute carrier family 22, member 17                                                    | 0.000510213 | 0.013793396 | 0.42 | 0.669 | 0    |
| 753 | LOC100133161 | hypothetical LOC100133161                                                              | 0.00051662  | 0.013948049 | 0.50 | 0.620 | 0    |
| 754 | PGLYRP1      | peptidoglycan recognition protein 1                                                    | 0.000519338 | 0.014002838 | 1.53 | 0.643 | 0    |
| 755 | GLT1D1       | glycosyltransferase 1 domain containing 1                                              | 0.000522626 | 0.014058863 | 1.91 | 0.629 | 0    |
| 756 | TIGD3        | tigger transposable element derived 3                                                  | 0.000522799 | 0.014058863 | 2.37 | 0.625 | 0    |
| 757 | SOAT1        | sterol O-acyltransferase 1                                                             | 0.00052827  | 0.014187221 | 3.43 | 0.671 | 0    |
| 758 | EHD2         | EH-domain containing 2                                                                 | 0.000529601 | 0.014196894 | 1.49 | 0.673 | 0.01 |
| 759 | KIAA1143     | KIAA1143                                                                               | 0.000530027 | 0.014196894 | 0.41 | 0.676 | 0    |
| 760 | LOC100128607 | cDNA FLJ45251 fis, clone BRHIP2009177.                                                 | 0.00053311  | 0.014241957 | 1.72 | 0.653 | 0    |
| 761 | PSD          | pleckstrin and Sec7 domain containing                                                  | 0.000533109 | 0.014241957 | 0.43 | 0.665 | 0    |
| 762 | GKN2         | gastrokine 2                                                                           | 0.000540447 | 0.014400118 | 1.62 | 0.630 | 0    |
| 763 | ARSK         | arylsulfatase family, member K                                                         | 0.000540322 | 0.014400118 | 0.40 | 0.676 | 0    |
| 764 | GNL3         | guanine nucleotide binding protein-like 3                                              | 0.000542421 | 0.014433787 | 9.98 | 0.654 | 0    |
| 765 | TMED4        | transmembrane emp24 protein transport domain containing 4                              | 0.00054484  | 0.014479205 | 0.35 | 0.642 | 0    |
| 766 | STYK1        | serine/threonine/tyrosine kinase 1                                                     | 0.000548207 | 0.014549662 | 1.54 | 0.672 | 0    |
| 767 | LOC93444     | cDNA FLJ20168 fis, clone COL09525                                                      | 0.000555787 | 0.014731606 | 2.07 | 0.657 | 0    |
| 768 | HIF3A        | HIF-3A4 mRNA for hypoxia-inducible factor-3 alpha 4                                    | 0.00055725  | 0.014732998 | 0.60 | 0.635 | 0    |
| 769 | SH2D1B       | SH2 domain containing 1B                                                               | 0.000557289 | 0.014732998 | 1.37 | 0.638 | 0    |
| 770 | SNCA         | synuclein, alpha                                                                       | 0.000558991 | 0.014758807 | 1.96 | 0.669 | 0    |
| 771 | EXD2         | exonuclease 3'-5' domain containing 2                                                  | 0.000561904 | 0.014812232 | 0.58 | 0.642 | 0    |
| 772 | PARP15       | poly (ADP-ribose) polymerase family, member 15                                         | 0.000562471 | 0.014812232 | 0.49 | 0.667 | 0    |
| 773 | IFITM1       | interferon induced transmembrane protein 1 (9-27)                                      | 0.000564407 | 0.014824787 | 1.43 | 0.671 | 0    |
| 774 | KLK6         | kallikrein-related peptidase 6                                                         | 0.000564176 | 0.014824787 | 2.08 | 0.653 | 0    |
| 775 | LRRN2        | leucine rich repeat neuronal 2                                                         | 0.00057081  | 0.014973628 | 0.33 | 0.668 | 0    |
| 776 | LOC644962    | cDNA FLJ46065 fis, clone TBAES2007862.                                                 | 0.00057553  | 0.015077991 | 0.33 | 0.679 | 0    |
| 777 | AP1S2        | adaptor-related protein complex 1, sigma 2 subunit                                     | 0.000576991 | 0.015096827 | 2.19 | 0.643 | 0    |
| 778 | TMEM27       | transmembrane protein 27                                                               | 0.000586073 | 0.015255907 | 2.49 | 0.612 | 0    |
| 779 | NAV2         | neuron navigator 2                                                                     | 0.000585599 | 0.015255907 | 1.51 | 0.671 | 0    |
| 780 | MARCKSL1     | MARCKS-like 1                                                                          | 0.000584791 | 0.015255907 | 1.53 | 0.669 | 0    |
| 781 | DHRS9        | dehydrogenase/reductase                                                                | 0.000584044 | 0.015255907 | 2.08 | 0.662 | 0    |
| 782 | KCTD9        | potassium channel tetramerisation domain containing 9                                  | 0.000589658 | 0.015329591 | 4.28 | 0.676 | 0    |
| 783 | H3F3B        | H3 histone, family 3B (H3.3B)                                                          | 0.000593492 | 0.015409559 | 8.95 | 0.648 | 0    |
| 784 | LOC100134229 | hypothetical protein LOC100134229                                                      | 0.000594475 | 0.015415405 | 1.99 | 0.678 | 0    |
| 785 | EXOG         | endo/exonuclease (5'-3'), endonuclease G-like                                          | 0.000596297 | 0.015442941 | 0.29 | 0.675 | 0    |
| 786 | AES          | amino-terminal enhancer of split                                                       | 0.000598549 | 0.015461919 | 0.14 | 0.683 | 0    |
| 787 | SCARNA2      | small Cajal body-specific RNA 2                                                        | 0.000599235 | 0.015461919 | 0.55 | 0.633 | 0    |

|     |              |                                                                             |             |             |      |       |      |
|-----|--------------|-----------------------------------------------------------------------------|-------------|-------------|------|-------|------|
| 788 | CAPN8        | calpain 8                                                                   | 0.000599311 | 0.015461919 | 1.98 | 0.647 | 0    |
| 789 | AUTS2        | autism susceptibility candidate 2                                           | 0.000600943 | 0.015484373 | 1.41 | 0.674 | 0    |
| 790 | GABPB2       | GA binding protein transcription factor, beta subunit 2                     | 0.000602966 | 0.015516826 | 7.50 | 0.653 | 0    |
| 791 | LILRB4       | leukocyte immunoglobulin-like receptor, subfamily B                         | 0.000604879 | 0.015546377 | 1.92 | 0.656 | 0    |
| 792 | TACC2        | transforming, acidic coiled-coil containing protein 2                       | 0.000608638 | 0.015623257 | 1.66 | 0.634 | 0    |
| 793 | RASGRP3      | RAS guanyl releasing protein 3                                              | 0.000618612 | 0.015682948 | 3.17 | 0.643 | 0    |
| 794 | C16orf89     | chromosome 16 open reading frame 89                                         | 0.000618486 | 0.015682948 | 1.68 | 0.679 | 0    |
| 795 | MYO7A        | myosin VIIA                                                                 | 0.00061614  | 0.015682948 | 1.81 | 0.669 | 0    |
| 796 | OXCT1        | 3-oxoacid CoA transferase 1                                                 | 0.000617721 | 0.015682948 | 1.59 | 0.668 | 0    |
| 797 | AFMID        | arylformamidase                                                             | 0.000613856 | 0.015682948 | 0.42 | 0.641 | 0    |
| 798 | LOC100129387 | hypothetical LOC100129387                                                   | 0.000618678 | 0.015682948 | 1.68 | 0.672 | 0    |
| 799 | LOC441025    | Homo sapiens cDNA clone IMAGE:5164155                                       | 0.000614674 | 0.015682948 | 0.44 | 0.690 | 0    |
| 800 | AZIN1        | antizyme inhibitor 1                                                        | 0.000613471 | 0.015682948 | 3.53 | 0.660 | 0    |
| 801 | SMAD5        | SMAD family member 5                                                        | 0.000615475 | 0.015682948 | 0.18 | 0.664 | 0    |
| 802 | SP140        | SP140 nuclear body protein                                                  | 0.000616321 | 0.015682948 | 0.31 | 0.655 | 0    |
| 803 | SIGLEC10     | sialic acid binding Ig-like lectin 10                                       | 0.000621428 | 0.015733039 | 1.52 | 0.660 | 0    |
| 804 | IRAK2        | interleukin-1 receptor-associated kinase 2                                  | 0.000623886 | 0.015756026 | 1.69 | 0.631 | 0    |
| 805 | PTPDC1       | protein tyrosine phosphatase domain containing 1                            | 0.000623687 | 0.015756026 | 0.56 | 0.636 | 0    |
| 806 | WHAMM        | WAS protein homolog associated with actin, golgi membranes and microtubules | 0.000627533 | 0.015828472 | 0.41 | 0.669 | 0    |
| 807 | SH3KBP1      | SH3-domain kinase binding protein 1                                         | 0.000630055 | 0.01585637  | 2.38 | 0.634 | 0    |
| 808 | ZNF684       | zinc finger protein 684                                                     | 0.000630199 | 0.01585637  | 0.35 | 0.648 | 0    |
| 809 | CMTM4        | CKLF-like MARVEL transmembrane domain containing 4                          | 0.000630987 | 0.015856567 | 1.99 | 0.666 | 0    |
| 810 | SPINK1       | serine peptidase inhibitor, Kazal type 1                                    | 0.000635938 | 0.015961264 | 1.36 | 0.688 | 0.02 |
| 811 | FAM161B      | family with sequence similarity 161, member B                               | 0.000638926 | 0.016010938 | 0.46 | 0.673 | 0    |
| 812 | DYTN         | dystrotelin                                                                 | 0.000639492 | 0.016010938 | 0.47 | 0.671 | 0    |
| 813 | FAM66D       | family with sequence similarity 66, member D                                | 0.000640333 | 0.016012267 | 0.39 | 0.693 | 0    |
| 814 | PHF19        | PHD finger protein 19                                                       | 0.000644317 | 0.016052651 | 3.07 | 0.667 | 0    |
| 815 | SIAH1        | seven in absentia homolog 1                                                 | 0.000642811 | 0.016052651 | 0.16 | 0.668 | 0    |
| 816 | MAF          | v-maf musculoaponeurotic fibrosarcoma oncogene homolog                      | 0.000644247 | 0.016052651 | 4.13 | 0.674 | 0    |
| 817 | DEFA3        | defensin, alpha 3, neutrophil-specific                                      | 0.000647178 | 0.016083911 | 1.21 | 0.652 | 0    |
| 818 | EHD3         | EH-domain containing 3                                                      | 0.000647945 | 0.016083911 | 1.64 | 0.655 | 0    |
| 819 | MYL9         | myosin, light chain 9, regulatory                                           | 0.000647406 | 0.016083911 | 1.92 | 0.666 | 0    |
| 820 | MEST         | mesoderm specific transcript homolog                                        | 0.000649607 | 0.016105495 | 2.12 | 0.672 | 0    |
| 821 | AGRP         | agouti related protein homolog                                              | 0.000654284 | 0.016201696 | 0.74 | 0.639 | 0    |
| 822 | EEPD1        | endonuclease/exonuclease/phosphatase family domain containing 1             | 0.000661167 | 0.016352221 | 2.10 | 0.675 | 0    |
| 823 | C10orf116    | chromosome 10 open reading frame 116                                        | 0.00066697  | 0.016475693 | 1.46 | 0.681 | 0    |
| 824 | PPCS         | phosphopantothienoylcysteine synthetase                                     | 0.000675177 | 0.016658197 | 0.20 | 0.660 | 0    |
| 825 | PREX1        | phosphatidylinositol-3,4,5-trisphosphate-dependent Rac exchange factor 1    | 0.000676851 | 0.016679246 | 3.09 | 0.653 | 0    |
| 826 | ABLIM3       | actin binding LIM protein family, member 3                                  | 0.000685738 | 0.016837032 | 2.04 | 0.663 | 0    |
| 827 | CPLX2        | complexin 2                                                                 | 0.000684897 | 0.016837032 | 0.49 | 0.668 | 0    |
| 828 | MPP7         | membrane protein, palmitoylated 7                                           | 0.000685702 | 0.016837032 | 1.61 | 0.648 | 0    |
| 829 | ARNTL2       | aryl hydrocarbon receptor nuclear translocator-like 2                       | 0.000689597 | 0.016911337 | 2.00 | 0.681 | 0    |
| 830 | DUSP12       | dual specificity phosphatase 12                                             | 0.000690471 | 0.016912373 | 5.14 | 0.655 | 0    |
| 831 | PLS1         | plastin 1                                                                   | 0.000696425 | 0.017037687 | 2.11 | 0.628 | 0    |
| 832 | ZNF717       | zinc finger protein 717                                                     | 0.000699508 | 0.017092542 | 0.46 | 0.650 | 0    |
| 833 | HNRNPH3      | heterogeneous nuclear ribonucleoprotein H3                                  | 0.000703586 | 0.017134564 | 3.15 | 0.649 | 0    |
| 834 | PRDM14       | PR domain containing 14                                                     | 0.000703756 | 0.017134564 | 2.20 | 0.619 | 0    |
| 835 | CYGB         | cytoglobin                                                                  | 0.000702295 | 0.017134564 | 0.55 | 0.637 | 0    |
| 836 | G0S2         | G0/G1switch 2                                                               | 0.000704767 | 0.01713864  | 1.39 | 0.655 | 0    |
| 837 | IL1B         | interleukin 1, beta                                                         | 0.000706314 | 0.01715576  | 2.17 | 0.616 | 0    |
| 838 | SLC6A17      | solute carrier family 6, member 17                                          | 0.000710264 | 0.017190074 | 0.69 | 0.655 | 0.02 |
| 839 | ITGAL        | integrin, alpha L                                                           | 0.000708575 | 0.017190074 | 0.29 | 0.684 | 0    |
| 840 | C17orf105    | chromosome 17 open reading frame 105                                        | 0.000709942 | 0.017190074 | 0.51 | 0.664 | 0    |
| 841 | IL18R1       | interleukin 18 receptor 1                                                   | 0.000715445 | 0.017294891 | 1.48 | 0.665 | 0    |
| 842 | PYDC1        | PYD (pyrin domain) containing 1                                             | 0.00072241  | 0.017421823 | 0.21 | 0.629 | 0    |
| 843 | ARHGEF3      | Rho guanine nucleotide exchange factor                                      | 0.00072203  | 0.017421823 | 0.35 | 0.625 | 0    |
| 844 | CLIC3        | chloride intracellular channel 3                                            | 0.000727674 | 0.01752798  | 1.41 | 0.683 | 0    |
| 845 | AHNAK2       | AHNAK nucleoprotein 2                                                       | 0.000729654 | 0.017539869 | 1.68 | 0.671 | 0.01 |
| 846 | CCDC115      | coiled-coil domain containing 115                                           | 0.00073251  | 0.017539869 | 0.11 | 0.676 | 0    |
| 847 | RGS12        | regulator of G-protein signaling 12                                         | 0.000732973 | 0.017539869 | 0.48 | 0.657 | 0    |
| 848 | TTL11        | tubulin tyrosine ligase-like family, member 11                              | 0.000731681 | 0.017539869 | 0.50 | 0.666 | 0    |

|     |           |                                                                                                      |             |             |       |       |      |
|-----|-----------|------------------------------------------------------------------------------------------------------|-------------|-------------|-------|-------|------|
| 849 | SBNO2     | strawberry notch homolog 2                                                                           | 0.000733174 | 0.017539869 | 3.14  | 0.662 | 0    |
| 850 | LILRA4    | leukocyte immunoglobulin-like receptor, subfamily A (with TM domain)                                 | 0.000733344 | 0.017539869 | 2.71  | 0.657 | 0    |
| 851 | FLRT2     | fibronectin leucine rich transmembrane protein 2                                                     | 0.000738215 | 0.017635618 | 1.59  | 0.647 | 0    |
| 852 | RRAD      | Ras-related associated with diabetes                                                                 | 0.000740516 | 0.017669825 | 1.50  | 0.657 | 0    |
| 853 | DOT1L     | DOT1-like, histone H3 methyltransferase                                                              | 0.000744473 | 0.017743426 | 2.18  | 0.652 | 0    |
| 854 | GPR143    | G protein-coupled receptor 143                                                                       | 0.000749795 | 0.017849335 | 2.09  | 0.638 | 0    |
| 855 | SLC6A9    | solute carrier family 6                                                                              | 0.000755728 | 0.017969538 | 1.71  | 0.649 | 0    |
| 856 | GGTLC1    | gamma-glutamyltransferase light chain 1                                                              | 0.000758604 | 0.018016834 | 3.26  | 0.675 | 0    |
| 857 | RPL22L1   | ribosomal protein L22-like 1                                                                         | 0.00076113  | 0.018034711 | 4.49  | 0.660 | 0    |
| 858 | GNG2      | guanine nucleotide binding protein (G protein), gamma 2                                              | 0.000760977 | 0.018034711 | 1.42  | 0.670 | 0    |
| 859 | LIPH      | lipase, member H                                                                                     | 0.000767233 | 0.01811863  | 1.53  | 0.656 | 0.01 |
| 860 | AGR2      | anterior gradient homolog 2                                                                          | 0.000767601 | 0.01811863  | 1.43  | 0.673 | 0    |
| 861 | PHLDA2    | pleckstrin homology-like domain, family A, member 2                                                  | 0.000768237 | 0.01811863  | 1.98  | 0.681 | 0    |
| 862 | CCPG1     | cell cycle progression 1                                                                             | 0.000766329 | 0.01811863  | 0.42  | 0.677 | 0    |
| 863 | ZNF626    | zinc finger protein 626                                                                              | 0.000769745 | 0.018133162 | 0.44  | 0.663 | 0    |
| 864 | SYNPO2L   | synaptopodin 2-like                                                                                  | 0.000772576 | 0.018178789 | 1.70  | 0.615 | 0    |
| 865 | RPL13AP17 | ribosomal protein L13a pseudogene 17                                                                 | 0.000773794 | 0.018186389 | 0.30  | 0.651 | 0    |
| 866 | DONSON    | downstream neighbor of SON                                                                           | 0.000775327 | 0.018201389 | 2.44  | 0.657 | 0    |
| 867 | ZNF493    | zinc finger protein 493                                                                              | 0.00077853  | 0.018255489 | 0.29  | 0.662 | 0    |
| 868 | MT1E      | metallothionein 1E                                                                                   | 0.000780722 | 0.018285794 | 2.55  | 0.634 | 0    |
| 869 | BMP2      | bone morphogenetic protein 2                                                                         | 0.000782016 | 0.018295043 | 1.54  | 0.627 | 0    |
| 870 | ANK3      | ankyrin 3, node of Ranvier                                                                           | 0.000785292 | 0.018350554 | 1.51  | 0.657 | 0    |
| 871 | HEY1      | hairy/enhancer-of-split related with YRPW motif 1                                                    | 0.000788797 | 0.018411305 | 1.74  | 0.614 | 0    |
| 872 | CLDN18    | claudin 18                                                                                           | 0.000791122 | 0.018444392 | 1.33  | 0.660 | 0    |
| 873 | GALNT12   | UDP-N-acetyl-alpha-D-galactosamine:polypeptide N-acetylgalactosaminyltransferase 12                  | 0.000795152 | 0.018517123 | 0.57  | 0.633 | 0    |
| 874 | NAT8L     | N-acetyltransferase 8-like (GCN5-related, putative)                                                  | 0.000797244 | 0.018544599 | 0.55  | 0.668 | 0    |
| 875 | TMEM25    | transmembrane protein 25                                                                             | 0.000799369 | 0.018572761 | 1.47  | 0.644 | 0    |
| 876 | MARVELD2  | MARVEL domain containing 2                                                                           | 0.00080431  | 0.018644948 | 2.07  | 0.662 | 0    |
| 877 | JHDM1D    | jumonji C domain containing histone demethylase 1 homolog D                                          | 0.000803933 | 0.018644948 | 1.99  | 0.651 | 0    |
| 878 | KRT14     | keratin 14                                                                                           | 0.000805373 | 0.018648331 | 1.43  | 0.663 | 0    |
| 879 | HEXIM2    | hexamethylene bis-acetamide inducible 2                                                              | 0.000806915 | 0.018662784 | 0.31  | 0.680 | 0    |
| 880 | GAS6      | growth arrest-specific 6                                                                             | 0.000808018 | 0.018667049 | 1.71  | 0.648 | 0    |
| 881 | NFIB      | nuclear factor I/B                                                                                   | 0.000809122 | 0.018671345 | 1.93  | 0.638 | 0    |
| 882 | SFTPC     | surfactant protein C                                                                                 | 0.000817494 | 0.01884315  | 1.33  | 0.680 | 0    |
| 883 | AHCTF1    | AT hook containing transcription factor 1                                                            | 0.000824667 | 0.018986965 | 2.28  | 0.666 | 0.02 |
| 884 | CTSF      | cathepsin F                                                                                          | 0.000831003 | 0.019033789 | 0.38  | 0.664 | 0    |
| 885 | SLC6A8    | solute carrier family 6                                                                              | 0.000829792 | 0.019033789 | 1.99  | 0.650 | 0    |
| 886 | DOK1      | docking protein 1, 62kDa (downstream of tyrosine kinase 1)                                           | 0.000829612 | 0.019033789 | 0.19  | 0.671 | 0    |
| 887 | SHISA3    | shisa homolog 3                                                                                      | 0.000829503 | 0.019033789 | 16.61 | 0.604 | 0    |
| 888 | C8orf4    | chromosome 8 open reading frame 4                                                                    | 0.000831382 | 0.019033789 | 1.53  | 0.635 | 0    |
| 889 | PAICS     | phosphoribosylaminoimidazole carboxylase, phosphoribosylaminoimidazole succinocarboxamide synthetase | 0.000833996 | 0.019072138 | 4.26  | 0.671 | 0    |
| 890 | PID1      | phosphotyrosine interaction domain containing 1                                                      | 0.000835825 | 0.019090355 | 1.45  | 0.670 | 0    |
| 891 | MAT2B     | methionine adenosyltransferase II, beta                                                              | 0.00083667  | 0.019090355 | 0.48  | 0.615 | 0    |
| 892 | ENPP2     | ectonucleotide pyrophosphatase/phosphodiesterase 2                                                   | 0.000839032 | 0.019095327 | 1.56  | 0.662 | 0.04 |
| 893 | TLR6      | toll-like receptor 6                                                                                 | 0.000839706 | 0.019095327 | 1.72  | 0.699 | 0.01 |
| 894 | NPC1      | Niemann-Pick disease, type C1                                                                        | 0.000838859 | 0.019095327 | 3.04  | 0.622 | 0    |
| 895 | LMO4      | LIM domain only 4                                                                                    | 0.000842346 | 0.019116751 | 0.24  | 0.656 | 0    |
| 896 | VMO1      | vitelline membrane outer layer 1 homolog                                                             | 0.00084535  | 0.019116751 | 0.68  | 0.646 | 0    |
| 897 | SYK       | spleen tyrosine kinase                                                                               | 0.000843719 | 0.019116751 | 0.19  | 0.636 | 0    |
| 898 | SCGBL     | secretoglobin-like                                                                                   | 0.000844316 | 0.019116751 | 0.38  | 0.661 | 0    |
| 899 | TLR1      | toll-like receptor 1                                                                                 | 0.000844718 | 0.019116751 | 3.99  | 0.644 | 0    |
| 900 | C19orf21  | chromosome 19 open reading frame 21                                                                  | 0.000850923 | 0.019221409 | 1.55  | 0.636 | 0    |
| 901 | LOC649201 | similar to paraneoplastic antigen MA1                                                                | 0.00085366  | 0.019240466 | 1.69  | 0.646 | 0.01 |
| 902 | TIMP3     | TIMP metalloproteinase inhibitor 3                                                                   | 0.000853276 | 0.019240466 | 1.57  | 0.667 | 0    |
| 903 | NPR2      | natriuretic peptide receptor B/guanylate cyclase B                                                   | 0.00085766  | 0.019287853 | 0.38  | 0.647 | 0    |
| 904 | LOC642826 | hypothetical LOC642826                                                                               | 0.000857561 | 0.019287853 | 0.25  | 0.656 | 0    |
| 905 | PRR7      | proline rich 7                                                                                       | 0.000869384 | 0.019529923 | 2.17  | 0.636 | 0    |
| 906 | ALDH1A1   | aldehyde dehydrogenase 1 family, member A1                                                           | 0.000871106 | 0.019547004 | 0.55  | 0.645 | 0    |
| 907 | GAL3ST4   | galactose-3-O-sulfotransferase 4                                                                     | 0.00087874  | 0.019654058 | 1.89  | 0.705 | 0    |
| 908 | PLEKHA5   | pleckstrin homology domain containing, family A member 5                                             | 0.000878689 | 0.019654058 | 1.63  | 0.649 | 0    |
| 909 | FAM120C   | family with sequence similarity 120C                                                                 | 0.000878777 | 0.019654058 | 0.26  | 0.627 | 0    |



|     |              |                                                                          |             |             |      |       |      |
|-----|--------------|--------------------------------------------------------------------------|-------------|-------------|------|-------|------|
| 910 | PGBD2        | piggyBac transposable element derived 2                                  | 0.000886647 | 0.019808268 | 0.19 | 0.645 | 0    |
| 911 | EDN2         | endothelin 2                                                             | 0.000895892 | 0.019992853 | 1.74 | 0.618 | 0    |
| 912 | DRD5         | dopamine receptor D5                                                     | 0.000899311 | 0.020047148 | 0.56 | 0.656 | 0    |
| 913 | MT1B         | metallothionein 1B                                                       | 0.000905712 | 0.020167717 | 2.51 | 0.641 | 0    |
| 914 | LOC375196    | hypothetical protein LOC375196                                           | 0.000908491 | 0.020207457 | 1.71 | 0.646 | 0    |
| 915 | ZNF720       | zinc finger protein 720                                                  | 0.000912141 | 0.020266477 | 0.28 | 0.643 | 0    |
| 916 | MYBPHL       | myosin binding protein H-like                                            | 0.00092377  | 0.02049227  | 1.63 | 0.616 | 0    |
| 917 | CD300A       | CD300a molecule                                                          | 0.000924319 | 0.02049227  | 2.01 | 0.649 | 0    |
| 918 | GOLGA7B      | golgi autoantigen, golgin subfamily a, 7B                                | 0.000925542 | 0.020497034 | 1.78 | 0.653 | 0    |
| 919 | CYP4B1       | cytochrome P450, family 4, subfamily B, polypeptide 1                    | 0.000928662 | 0.020543736 | 1.47 | 0.643 | 0    |
| 920 | POLD3        | polymerase (DNA-directed), delta 3, accessory subunit                    | 0.000930342 | 0.020558527 | 0.27 | 0.635 | 0    |
| 921 | IRX5         | iroquois homeobox 5                                                      | 0.000933711 | 0.020588231 | 1.75 | 0.639 | 0    |
| 922 | MOCS2        | molybdenum cofactor synthesis 2                                          | 0.000932957 | 0.020588231 | 0.26 | 0.639 | 0    |
| 923 | FGFBP1       | fibroblast growth factor binding protein 1                               | 0.000934965 | 0.020593546 | 1.85 | 0.615 | 0    |
| 924 | SGPP2        | sphingosine-1-phosphate phosphatase 2                                    | 0.000939448 | 0.020669886 | 1.59 | 0.628 | 0    |
| 925 | DCST2        | DC-STAMP domain containing 2                                             | 0.000945667 | 0.020758771 | 0.40 | 0.659 | 0    |
| 926 | C4orf34      | chromosome 4 open reading frame 34                                       | 0.0009456   | 0.020758771 | 0.31 | 0.659 | 0    |
| 927 | PPP1R14A     | protein phosphatase 1, regulatory (inhibitor) subunit 14A                | 0.000946551 | 0.020758771 | 0.60 | 0.626 | 0    |
| 928 | IL1A         | interleukin 1, alpha                                                     | 0.00095169  | 0.020829267 | 0.52 | 0.663 | 0    |
| 929 | YIPF5        | Yip1 domain family, member 5                                             | 0.000951815 | 0.020829267 | 0.38 | 0.642 | 0    |
| 930 | AIMP2        | aminoacyl tRNA synthetase complex-interacting multifunctional protein 2  | 0.000952977 | 0.020832277 | 3.74 | 0.659 | 0    |
| 931 | LOC100129869 | hypothetical protein LOC100129869                                        | 0.000955407 | 0.020862966 | 1.70 | 0.629 | 0.01 |
| 932 | WFDC2        | WAP four-disulfide core domain 2                                         | 0.000967141 | 0.021073929 | 1.41 | 0.668 | 0    |
| 933 | CTRC         | chymotrypsin C (caldecrin)                                               | 0.000966674 | 0.021073929 | 1.61 | 0.629 | 0    |
| 934 | XAGE2B       | X antigen family, member 2B                                              | 0.000974836 | 0.021204331 | 1.42 | 0.645 | 0    |
| 935 | FOSL1        | FOS-like antigen 1                                                       | 0.000975211 | 0.021204331 | 1.83 | 0.657 | 0    |
| 936 | ZNF846       | zinc finger protein 846                                                  | 0.000977217 | 0.021225241 | 0.60 | 0.646 | 0    |
| 937 | TTC30B       | tetratricopeptide repeat domain 30B                                      | 0.000980886 | 0.021282188 | 0.34 | 0.637 | 0    |
| 938 | ATHL1        | ATH1, acid trehalase-like 1                                              | 0.000987897 | 0.021411448 | 1.64 | 0.644 | 0    |
| 939 | ZC3H12C      | zinc finger CCHC-type containing 12C                                     | 0.000993806 | 0.02151296  | 1.53 | 0.665 | 0    |
| 940 | SNORA28      | small nucleolar RNA, H/ACA box 28                                        | 0.000994697 | 0.02151296  | 0.68 | 0.668 | 0    |
| 941 | FGF7         | fibroblast growth factor 7 (keratinocyte growth factor)                  | 0.00099612  | 0.021520842 | 0.60 | 0.666 | 0    |
| 942 | LOC727993    | cDNA FLJ33362 fis, clone BRACE2005337                                    | 0.001004567 | 0.021543097 | 0.52 | 0.663 | 0.01 |
| 943 | CCR5         | chemokine (CC-motif) receptor type 5                                     | 0.00100454  | 0.021543097 | 2.21 | 0.669 | 0    |
| 944 | SOD2         | superoxide dismutase 2, mitochondrial                                    | 0.000999313 | 0.021543097 | 2.28 | 0.608 | 0    |
| 945 | TMEM14A      | transmembrane protein 14A                                                | 0.000998826 | 0.021543097 | 0.46 | 0.677 | 0    |
| 946 | KIR2DS2      | killer cell immunoglobulin-like receptor, two domains, short cytoplasmic | 0.001003494 | 0.021543097 | 1.56 | 0.654 | 0    |
| 947 | CD300LB      | CD300 molecule-like family member b                                      | 0.001002781 | 0.021543097 | 2.11 | 0.650 | 0    |
| 948 | SLC1A4       | solute carrier family 1                                                  | 0.001001826 | 0.021543097 | 1.89 | 0.667 | 0    |
| 949 | NPDC1        | neural proliferation, differentiation and control, 1                     | 0.001010193 | 0.021640918 | 1.52 | 0.660 | 0    |
| 950 | CHCHD6       | coiled-coil-helix-coiled-coil-helix domain containing 6                  | 0.001018029 | 0.021740051 | 0.44 | 0.662 | 0    |
| 951 | GULP1        | GULP, engulfment adaptor PTB domain containing 1                         | 0.001017487 | 0.021740051 | 1.87 | 0.616 | 0    |
| 952 | IL6          | interleukin 6 (interferon, beta 2)                                       | 0.00101644  | 0.021740051 | 1.40 | 0.651 | 0    |
| 953 | FSCN1        | fascin homolog 1, actin-bundling protein                                 | 0.001020908 | 0.021778663 | 2.00 | 0.651 | 0    |
| 954 | SAP30        | Sin3A-associated protein, 30kDa                                          | 0.001023756 | 0.02181651  | 2.21 | 0.653 | 0    |
| 955 | POMGNT1      | protein O-linked mannose beta1,2-N-acetylglucosaminyltransferase         | 0.001025251 | 0.0218255   | 0.19 | 0.630 | 0    |
| 956 | ZNF852       | Putative zinc finger protein FLJ16720                                    | 0.001030065 | 0.021905054 | 0.55 | 0.643 | 0    |
| 957 | OPN3         | opsin 3                                                                  | 0.001032121 | 0.02192584  | 0.49 | 0.639 | 0    |
| 958 | LOC338620    | hypothetical protein LOC338620                                           | 0.001034615 | 0.021932977 | 1.74 | 0.662 | 0.01 |
| 959 | TTC8         | tetratricopeptide repeat domain 8                                        | 0.001034496 | 0.021932977 | 0.52 | 0.642 | 0    |
| 960 | RGS3         | regulator of G-protein signaling 3                                       | 0.001040077 | 0.022025803 | 0.46 | 0.648 | 0    |
| 961 | TFPI         | tissue factor pathway inhibitor                                          | 0.001042811 | 0.022060722 | 1.40 | 0.652 | 0    |
| 962 | SPG21        | spastic paraplegia 21                                                    | 0.001044386 | 0.022071058 | 0.27 | 0.649 | 0    |
| 963 | LYPD5        | LY6/PLAUR domain containing 5                                            | 0.001045485 | 0.022071353 | 0.69 | 0.657 | 0    |
| 964 | SGPP1        | sphingosine-1-phosphate phosphatase 1                                    | 0.001051346 | 0.022172056 | 0.56 | 0.657 | 0    |
| 965 | KLF9         | Kruppel-like factor 9                                                    | 0.001056774 | 0.022217232 | 2.18 | 0.653 | 0    |
| 966 | EIF2B3       | eukaryotic translation initiation factor 2B, subunit 3 gamma, 58kDa      | 0.001056899 | 0.022217232 | 0.28 | 0.632 | 0    |
| 967 | NGFR         | nerve growth factor receptor (TNFR superfamily, member 1c1)              | 0.001055695 | 0.022217232 | 1.97 | 0.647 | 0    |
| 968 | NUAK1        | NUAK family, SNF1-like kinase, 1                                         | 0.001057859 | 0.022217232 | 1.55 | 0.644 | 0    |
| 969 | RHOBTB1      | Rho-related BTB domain containing 1                                      | 0.001062695 | 0.022295754 | 3.09 | 0.648 | 0    |
| 970 | LOC100130152 | cDNA FLJ45869 fis, clone OCBBF3004908.                                   | 0.001065137 | 0.022323964 | 0.52 | 0.673 | 0    |

|      |              |                                                                                                              |             |             |      |       |      |
|------|--------------|--------------------------------------------------------------------------------------------------------------|-------------|-------------|------|-------|------|
| 971  | C3orf52      | chromosome 3 open reading frame 52                                                                           | 0.001068792 | 0.022377499 | 1.88 | 0.620 | 0    |
| 972  | IVD          | isovaleryl Coenzyme A dehydrogenase                                                                          | 0.001071871 | 0.022408152 | 0.34 | 0.652 | 0    |
| 973  | LOC100129447 | cDNA FLJ30384 fis, clone BRACE2008114.                                                                       | 0.001072461 | 0.022408152 | 0.65 | 0.632 | 0    |
| 974  | HIST3H2A     | histone cluster 3, H2a                                                                                       | 0.001075608 | 0.022450829 | 1.77 | 0.648 | 0    |
| 975  | LOC100130298 | similar to hCG1816373                                                                                        | 0.001080086 | 0.022521176 | 1.58 | 0.668 | 0    |
| 976  | MLLT4        | myeloid/lymphoid or mixed-lineage leukemia                                                                   | 0.001082257 | 0.02254333  | 0.39 | 0.673 | 0    |
| 977  | CCDC101      | coiled-coil domain containing 101                                                                            | 0.001089724 | 0.022675631 | 0.29 | 0.679 | 0    |
| 978  | STX11        | syntaxin 11                                                                                                  | 0.001097705 | 0.022786526 | 0.25 | 0.643 | 0    |
| 979  | NEDD4L       | neural precursor cell expressed, developmentally down-regulated 4-like                                       | 0.001098416 | 0.022786526 | 1.67 | 0.685 | 0    |
| 980  | RRP15        | ribosomal RNA processing 15 homolog                                                                          | 0.001097653 | 0.022786526 | 2.95 | 0.644 | 0    |
| 981  | HMGB2        | high-mobility group box 2                                                                                    | 0.001099683 | 0.022789552 | 2.02 | 0.663 | 0    |
| 982  | C7orf70      | chromosome 7 open reading frame 70                                                                           | 0.001102818 | 0.022808018 | 0.19 | 0.664 | 0    |
| 983  | MPHOSPH9     | M-phase phosphoprotein 9                                                                                     | 0.001102214 | 0.022808018 | 0.38 | 0.665 | 0    |
| 984  | SELM         | selenoprotein M                                                                                              | 0.001113056 | 0.022990236 | 0.42 | 0.645 | 0    |
| 985  | LILRB3       | leukocyte immunoglobulin-like receptor, subfamily B                                                          | 0.001115021 | 0.022990236 | 3.70 | 0.640 | 0    |
| 986  | C5orf56      | chromosome 5 open reading frame 56                                                                           | 0.001114909 | 0.022990236 | 0.60 | 0.655 | 0    |
| 987  | TPPP3        | tubulin polymerization-promoting protein family member 3                                                     | 0.001116219 | 0.022991623 | 1.52 | 0.663 | 0    |
| 988  | LOC100131700 | similar to mCG15963                                                                                          | 0.00111999  | 0.023045939 | 0.56 | 0.638 | 0    |
| 989  | RSPH3        | radial spoke 3 homolog                                                                                       | 0.001125378 | 0.023119142 | 0.32 | 0.657 | 0    |
| 990  | RNF207       | cDNA FLJ46380 fis, clone THYMU2008207.                                                                       | 0.001126705 | 0.023119142 | 1.66 | 0.650 | 0    |
| 991  | OR4A15       | olfactory receptor, family 4, subfamily A, member 15                                                         | 0.001126959 | 0.023119142 | 0.47 | 0.671 | 0    |
| 992  | NRAS         | neuroblastoma RAS viral                                                                                      | 0.001132107 | 0.02317503  | 4.93 | 0.674 | 0    |
| 993  | ADRB1        | adrenergic, beta-1-, receptor                                                                                | 0.001133076 | 0.02317503  | 1.53 | 0.659 | 0    |
| 994  | PPM1K        | protein phosphatase 1K (PP2C domain containing)                                                              | 0.001133103 | 0.02317503  | 0.44 | 0.647 | 0    |
| 995  | GNLY         | granulysin                                                                                                   | 0.001141732 | 0.023328059 | 1.28 | 0.656 | 0.02 |
| 996  | RIMS3        | regulating synaptic membrane exocytosis 3                                                                    | 0.001150769 | 0.023489084 | 1.69 | 0.704 | 0    |
| 997  | KGFLP2       | keratinocyte growth factor-like protein 2                                                                    | 0.001158984 | 0.023633039 | 0.52 | 0.660 | 0    |
| 998  | CSTA         | cystatin A (stefin A)                                                                                        | 0.001163626 | 0.023675032 | 0.33 | 0.655 | 0    |
| 999  | ICOS         | inducible T-cell co-stimulator                                                                               | 0.001163926 | 0.023675032 | 0.62 | 0.650 | 0    |
| 1000 | C22orf36     | chromosome 22 open reading frame 36                                                                          | 0.001164537 | 0.023675032 | 1.87 | 0.674 | 0    |
| 1001 | FARP2        | FERM, RhoGEF and pleckstrin domain protein 2                                                                 | 0.001167206 | 0.023680869 | 0.58 | 0.668 | 0    |
| 1002 | PIK3CD       | phosphoinositide-3-kinase, catalytic, delta polypeptide                                                      | 0.001168251 | 0.023680869 | 2.05 | 0.634 | 0    |
| 1003 | KCNS3        | potassium voltage-gated channel, delayed-rectifier, subfamily 5 member 3                                     | 0.001168318 | 0.023680869 | 1.55 | 0.645 | 0    |
| 1004 | NPNT         | nephronectin                                                                                                 | 0.001171407 | 0.02369895  | 1.77 | 0.655 | 0    |
| 1005 | SCPEP1       | serine carboxypeptidase 1                                                                                    | 0.001171542 | 0.02369895  | 0.31 | 0.624 | 0    |
| 1006 | RAB15        | RAB15, member RAS oncogene family                                                                            | 0.001183253 | 0.023908262 | 1.39 | 0.671 | 0    |
| 1007 | LHFP         | lipoma HMGIC fusion partner                                                                                  | 0.001184241 | 0.023908262 | 1.65 | 0.640 | 0    |
| 1008 | PYY2         | peptide YY, 2 (seminalplasmin)                                                                               | 0.001189741 | 0.023982298 | 0.64 | 0.639 | 0    |
| 1009 | ST13         | suppression of tumorigenicity 13 (Hsp70 interacting protein)                                                 | 0.001190268 | 0.023982298 | 0.33 | 0.656 | 0    |
| 1010 | MFSD1        | major facilitator superfamily domain containing 1                                                            | 0.001195721 | 0.024068322 | 6.28 | 0.648 | 0    |
| 1011 | TM4SF19      | transmembrane 4 L six family member 19                                                                       | 0.001201847 | 0.024108111 | 1.46 | 0.666 | 0    |
| 1012 | SH3BP4       | SH3-domain binding protein 4                                                                                 | 0.001202441 | 0.024108111 | 0.70 | 0.653 | 0    |
| 1013 | SLC44A3      | solute carrier family 44, member 3                                                                           | 0.00120081  | 0.024108111 | 1.66 | 0.640 | 0    |
| 1014 | TSNAX        | translin-associated factor X                                                                                 | 0.001199445 | 0.024108111 | 0.51 | 0.665 | 0    |
| 1015 | ST6GALNAC6   | ST6 (alpha-N-acetylneuraminyl-2,3-beta-galactosyl-1,3)-N-acetylgalactosaminide alpha-2,6-sialyltransferase 6 | 0.001206275 | 0.024161151 | 0.34 | 0.635 | 0    |
| 1016 | ZNF382       | zinc finger protein 382                                                                                      | 0.001214257 | 0.024297099 | 0.50 | 0.668 | 0    |
| 1017 | AGPAT9       | 1-acylglycerol-3-phosphate O-acyltransferase 9                                                               | 0.001215916 | 0.024306364 | 1.83 | 0.659 | 0    |
| 1018 | CCDC75       | coiled-coil domain containing 75                                                                             | 0.001219079 | 0.02434566  | 0.52 | 0.653 | 0    |
| 1019 | CCDC126      | coiled-coil domain containing 126                                                                            | 0.001227187 | 0.024483515 | 0.31 | 0.653 | 0    |
| 1020 | CYP2R1       | cytochrome P450, family 2, subfamily R, polypeptide 1                                                        | 0.001233811 | 0.024591548 | 5.48 | 0.661 | 0    |
| 1021 | OLFML3       | olfactomedin-like 3                                                                                          | 0.001244965 | 0.024741097 | 1.71 | 0.643 | 0.01 |
| 1022 | MLF1         | myeloid leukemia factor 1                                                                                    | 0.00124327  | 0.024741097 | 0.60 | 0.621 | 0    |
| 1023 | ANKMY2       | ankyrin repeat and MYND domain containing 2                                                                  | 0.001244942 | 0.024741097 | 0.36 | 0.650 | 0    |
| 1024 | ADAMDEC1     | ADAM-like, decysin 1                                                                                         | 0.00125316  | 0.024879638 | 1.56 | 0.601 | 0    |
| 1025 | AADA2L2      | arylacetamide deacetylase-like 2                                                                             | 0.001255761 | 0.024906945 | 0.00 | 0.650 | 0    |
| 1026 | BANP         | BTG3 associated nuclear protein                                                                              | 0.001268734 | 0.025139725 | 3.87 | 0.657 | 0    |
| 1027 | FKBP3        | FK506 binding protein 3, 25kDa                                                                               | 0.00127351  | 0.025209796 | 6.55 | 0.668 | 0    |
| 1028 | ETV5         | ets variant 5                                                                                                | 0.001275613 | 0.025226854 | 1.98 | 0.608 | 0    |
| 1029 | ZNF614       | zinc finger protein 614                                                                                      | 0.001277418 | 0.025238012 | 0.36 | 0.664 | 0    |
| 1030 | NT5DC2       | 5'-nucleotidase domain containing 2                                                                          | 0.001280119 | 0.025266806 | 1.62 | 0.681 | 0    |
| 1031 | TLR10        | toll-like receptor 10                                                                                        | 0.001284528 | 0.025313455 | 1.58 | 0.664 | 0.01 |

|      |              |                                                                                       |             |             |      |       |      |
|------|--------------|---------------------------------------------------------------------------------------|-------------|-------------|------|-------|------|
| 1032 | ZNF737       | zinc finger protein 737                                                               | 0.001284972 | 0.025313455 | 0.55 | 0.671 | 0    |
| 1033 | ARHGAP26     | Rho GTPase activating protein 26                                                      | 0.001291467 | 0.025318725 | 2.60 | 0.651 | 0    |
| 1034 | DUOX1        | dual oxidase 1                                                                        | 0.001287321 | 0.025318725 | 1.44 | 0.656 | 0    |
| 1035 | TMEM86A      | transmembrane protein 86A                                                             | 0.001290647 | 0.025318725 | 0.59 | 0.658 | 0    |
| 1036 | ZC3HAV1      | zinc finger CCHC-type, antiviral 1                                                    | 0.001290887 | 0.025318725 | 2.23 | 0.663 | 0    |
| 1037 | FCGR1B       | Fc fragment of IgG, high affinity I <sub>b</sub> receptor                             | 0.001289047 | 0.025318725 | 0.45 | 0.634 | 0    |
| 1038 | BNIP3        | BCL2/adenovirus E1B 19kDa interacting protein 3                                       | 0.00129474  | 0.025358447 | 2.23 | 0.673 | 0    |
| 1039 | AREG         | amphiregulin                                                                          | 0.001302871 | 0.025493133 | 1.36 | 0.661 | 0    |
| 1040 | RAP2B        | RAP2B, member of RAS oncogene family                                                  | 0.001306977 | 0.025548894 | 2.63 | 0.665 | 0    |
| 1041 | CAV2         | caveolin 2                                                                            | 0.001310971 | 0.025602351 | 1.62 | 0.652 | 0    |
| 1042 | GIN1         | gypsy retrotransposon integrase 1                                                     | 0.001316166 | 0.025679128 | 0.55 | 0.641 | 0    |
| 1043 | LOC100131283 | hypothetical LOC100131283                                                             | 0.0013289   | 0.025720081 | 2.01 | 0.634 | 0    |
| 1044 | SGCB         | sarcoglycan, beta (43kDa dystrophin-associated glycoprotein)                          | 0.001330916 | 0.025720081 | 1.85 | 0.639 | 0    |
| 1045 | PTGS2        | prostaglandin-endoperoxide synthase 2 (prostaglandin G/H synthase and cyclooxygenase) | 0.00132775  | 0.025720081 | 1.65 | 0.660 | 0    |
| 1046 | CDK9         | cyclin-dependent kinase 9                                                             | 0.001326111 | 0.025720081 | 0.21 | 0.672 | 0    |
| 1047 | FAM110B      | family with sequence similarity 110, member B                                         | 0.001326407 | 0.025720081 | 0.51 | 0.640 | 0    |
| 1048 | FLNB         | filamin B, beta                                                                       | 0.001330852 | 0.025720081 | 2.29 | 0.645 | 0    |
| 1049 | ZNF365       | zinc finger protein 365                                                               | 0.001328844 | 0.025720081 | 0.74 | 0.626 | 0    |
| 1050 | ACCN2        | amiloride-sensitive cation channel 2, neuronal                                        | 0.001323206 | 0.025720081 | 1.69 | 0.665 | 0    |
| 1051 | LOC100128219 | cDNA FLJ38606 fis, clone HEART2004940.                                                | 0.001320868 | 0.025720081 | 0.51 | 0.670 | 0    |
| 1052 | SSX5         | synovial sarcoma, X breakpoint 5                                                      | 0.001325206 | 0.025720081 | 0.56 | 0.642 | 0    |
| 1053 | GPATCH4      | G patch domain containing 4                                                           | 0.001332441 | 0.025725094 | 3.44 | 0.661 | 0    |
| 1054 | PNMA6A       | paraneoplastic antigen like 6A                                                        | 0.001334942 | 0.025748938 | 1.69 | 0.665 | 0    |
| 1055 | HPGD5        | hematopoietic prostaglandin D synthase                                                | 0.001339003 | 0.02577319  | 0.67 | 0.650 | 0    |
| 1056 | LMO3         | LIM domain only 3                                                                     | 0.001338263 | 0.02577319  | 1.56 | 0.629 | 0    |
| 1057 | TNFRSF21     | tumor necrosis factor receptor superfamily, member 21                                 | 0.001340003 | 0.02577319  | 2.46 | 0.667 | 0    |
| 1058 | DAPL1        | death associated protein-like 1                                                       | 0.001346196 | 0.025867836 | 2.42 | 0.604 | 0    |
| 1059 | TMCS         | transmembrane channel-like 5                                                          | 0.001358986 | 0.02606561  | 1.47 | 0.649 | 0    |
| 1060 | LOC100132483 | hypothetical LOC100132483                                                             | 0.001359053 | 0.02606561  | 0.51 | 0.665 | 0    |
| 1061 | TMEM45B      | transmembrane protein 45B                                                             | 0.001361123 | 0.026080698 | 1.39 | 0.688 | 0.02 |
| 1062 | LOC389834    | ankyrin repeat domain 57 pseudogene                                                   | 0.001368263 | 0.026146065 | 0.28 | 0.661 | 0    |
| 1063 | FAM174B      | family with sequence similarity 174, member B                                         | 0.001368392 | 0.026146065 | 1.81 | 0.648 | 0    |
| 1064 | PKD1         | polycystic kidney disease 1                                                           | 0.001366072 | 0.026146065 | 0.58 | 0.633 | 0    |
| 1065 | RNF217       | ring finger protein 217                                                               | 0.001372201 | 0.02619422  | 0.42 | 0.659 | 0    |
| 1066 | BCAR3        | breast cancer anti-estrogen resistance 3                                              | 0.001377709 | 0.026256072 | 0.65 | 0.647 | 0    |
| 1067 | COG3         | component of oligomeric golgi complex 3                                               | 0.001379316 | 0.026256072 | 2.88 | 0.663 | 0    |
| 1068 | ZNF675       | zinc finger protein 675                                                               | 0.001378552 | 0.026256072 | 0.52 | 0.666 | 0    |
| 1069 | NCF4         | neutrophil cytosolic factor 4, 40kDa                                                  | 0.001387859 | 0.026257915 | 0.29 | 0.640 | 0    |
| 1070 | WVVOX        | WW domain containing oxidoreductase                                                   | 0.001388508 | 0.026257915 | 0.52 | 0.635 | 0    |
| 1071 | MYB          | v-myb myeloblastosis viral oncogene homolog                                           | 0.001388258 | 0.026257915 | 0.50 | 0.639 | 0    |
| 1072 | PRR5L        | proline rich 5 like                                                                   | 0.001389542 | 0.026257915 | 1.58 | 0.661 | 0    |
| 1073 | C10orf128    | chromosome 10 open reading frame 128                                                  | 0.001387592 | 0.026257915 | 0.62 | 0.646 | 0    |
| 1074 | C9orf102     | chromosome 9 open reading frame 102                                                   | 0.001389745 | 0.026257915 | 0.54 | 0.640 | 0    |
| 1075 | WDR90        | WD repeat domain 90                                                                   | 0.001384922 | 0.026257915 | 0.58 | 0.651 | 0    |
| 1076 | TNIP1        | TNFAIP3 interacting protein 1                                                         | 0.001383514 | 0.026257915 | 2.95 | 0.638 | 0    |
| 1077 | ZNF697       | zinc finger protein 697                                                               | 0.001392622 | 0.026274226 | 2.59 | 0.630 | 0    |
| 1078 | CPNE5        | copine V                                                                              | 0.001393193 | 0.026274226 | 1.39 | 0.633 | 0    |
| 1079 | AMDHD1       | amidohydrolase domain containing 1                                                    | 0.001403962 | 0.026452779 | 1.51 | 0.657 | 0.01 |
| 1080 | NAIP         | NLR family, apoptosis inhibitory protein                                              | 0.001407714 | 0.026498914 | 1.96 | 0.636 | 0    |
| 1081 | PHF23        | PHD finger protein 23                                                                 | 0.001416196 | 0.026633922 | 4.79 | 0.675 | 0    |
| 1082 | ORMDL1       | ORM1-like 1                                                                           | 0.00141934  | 0.026668379 | 4.31 | 0.652 | 0    |
| 1083 | PSMD12       | Proteasome (prosome, macropain) 26S subunit, non-ATPase, 12                           | 0.001423808 | 0.026702973 | 5.33 | 0.666 | 0    |
| 1084 | CACNA1I      | calcium channel, voltage-dependent, T type, alpha 1I subunit                          | 0.001423097 | 0.026702973 | 0.37 | 0.650 | 0    |
| 1085 | MITD1        | MIT, microtubule interacting and transport, domain containing 1                       | 0.001434469 | 0.026828655 | 3.31 | 0.638 | 0    |
| 1086 | EFCAB3       | EF-hand calcium binding domain 3                                                      | 0.001432168 | 0.026828655 | 0.65 | 0.625 | 0    |
| 1087 | ADAM12       | ADAM metalloproteinase domain 12                                                      | 0.001433674 | 0.026828655 | 0.48 | 0.673 | 0    |
| 1088 | RASAL2       | RAS protein activator like 2                                                          | 0.001439205 | 0.026892495 | 0.74 | 0.651 | 0    |
| 1089 | SVIL         | supervillin                                                                           | 0.001444187 | 0.026960808 | 0.51 | 0.646 | 0    |
| 1090 | DAZAP2       | DAZ associated protein 2                                                              | 0.001447733 | 0.027002222 | 4.05 | 0.638 | 0    |
| 1091 | MEX3D        | mex-3 homolog D                                                                       | 0.001452432 | 0.027065023 | 0.37 | 0.679 | 0    |
| 1092 | SRI          | sorcin                                                                                | 0.001463092 | 0.027238698 | 0.33 | 0.645 | 0    |

|      |              |                                                                       |             |             |      |       |      |
|------|--------------|-----------------------------------------------------------------------|-------------|-------------|------|-------|------|
| 1093 | CCND1        | cyclin D1                                                             | 0.001471241 | 0.027365354 | 1.64 | 0.639 | 0    |
| 1094 | LRIG3        | leucine-rich repeats and immunoglobulin-like domains 3                | 0.001474831 | 0.027382019 | 1.66 | 0.646 | 0    |
| 1095 | POLB         | polymerase (DNA directed), beta                                       | 0.00147454  | 0.027382019 | 0.27 | 0.656 | 0    |
| 1096 | HRK          | harakiri, BCL2 interacting protein (contains only BH3 domain)         | 0.001485427 | 0.027503389 | 1.57 | 0.639 | 0    |
| 1097 | ANP32D       | acidic (leucine-rich) nuclear phosphoprotein 32 family, member D      | 0.001483084 | 0.027503389 | 0.56 | 0.629 | 0    |
| 1098 | LOC284749    | hypothetical LOC284749                                                | 0.001484788 | 0.027503389 | 0.43 | 0.658 | 0    |
| 1099 | SMOX         | spermine oxidase                                                      | 0.001496886 | 0.027523334 | 1.42 | 0.671 | 0.01 |
| 1100 | MCTP2        | multiple C2 domains, transmembrane 2                                  | 0.001503516 | 0.027523334 | 1.58 | 0.619 | 0    |
| 1101 | LOC440356    | hypothetical LOC440356                                                | 0.00149689  | 0.027523334 | 0.41 | 0.668 | 0    |
| 1102 | PGP          | phosphoglycolate phosphatase                                          | 0.001504452 | 0.027523334 | 0.24 | 0.665 | 0    |
| 1103 | SYNCRIP      | synaptotagmin binding, cytoplasmic RNA interacting protein            | 0.001505872 | 0.027523334 | 3.75 | 0.658 | 0    |
| 1104 | C1R          | complement component 1, r subcomponent                                | 0.001498466 | 0.027523334 | 1.72 | 0.671 | 0    |
| 1105 | TGFB1        | transforming growth factor, beta-induced, 68kDa                       | 0.001494832 | 0.027523334 | 3.59 | 0.650 | 0    |
| 1106 | PECAM1       | platelet/endothelial cell adhesion molecule                           | 0.001488325 | 0.027523334 | 0.26 | 0.660 | 0    |
| 1107 | IAPP         | islet amyloid polypeptide                                             | 0.001493011 | 0.027523334 | 0.50 | 0.667 | 0    |
| 1108 | SNX29        | sorting nexin 29                                                      | 0.001506811 | 0.027523334 | 4.05 | 0.661 | 0    |
| 1109 | C1orf21      | chromosome 1 open reading frame 21                                    | 0.001497772 | 0.027523334 | 1.48 | 0.647 | 0    |
| 1110 | KLHL21       | kelch-like 21                                                         | 0.001504885 | 0.027523334 | 3.54 | 0.631 | 0    |
| 1111 | WTIP         | Wilms tumor 1 interacting protein                                     | 0.001504436 | 0.027523334 | 1.79 | 0.656 | 0    |
| 1112 | LOC100128843 | similar to DNA polymerase epsilon catalytic subunit protein           | 0.001501461 | 0.027523334 | 0.40 | 0.662 | 0    |
| 1113 | LOC728323    | hypothetical LOC728323                                                | 0.001499559 | 0.027523334 | 0.40 | 0.648 | 0    |
| 1114 | LMNB1        | lamin B1                                                              | 0.001516506 | 0.02767556  | 2.30 | 0.638 | 0    |
| 1115 | C8orf38      | chromosome 8 open reading frame 38                                    | 0.001519032 | 0.027696787 | 3.23 | 0.640 | 0    |
| 1116 | TM6SF1       | transmembrane 6 superfamily member 1                                  | 0.001520582 | 0.027700217 | 0.35 | 0.650 | 0    |
| 1117 | TPP1         | tripeptidyl peptidase I                                               | 0.001522369 | 0.027707935 | 0.59 | 0.629 | 0    |
| 1118 | CASP6        | caspase 6, apoptosis-related cysteine peptidase                       | 0.001535989 | 0.027930816 | 0.20 | 0.674 | 0    |
| 1119 | RWDD2A       | RWD domain containing 2A                                              | 0.00153841  | 0.027949849 | 0.33 | 0.640 | 0    |
| 1120 | SPRED1       | sprouty-related, EVH1 domain containing 1                             | 0.001540604 | 0.02795349  | 2.70 | 0.687 | 0    |
| 1121 | KLF8         | Kruppel-like factor 8                                                 | 0.001541361 | 0.02795349  | 0.49 | 0.644 | 0    |
| 1122 | PTPRN2       | protein tyrosine phosphatase, receptor type, N polypeptide 2          | 0.001552521 | 0.028086871 | 1.58 | 0.650 | 0    |
| 1123 | CTNNA1       | catenin (cadherin-associated protein), alpha-like 1                   | 0.001550608 | 0.028086871 | 2.21 | 0.662 | 0    |
| 1124 | C12orf24     | chromosome 12 open reading frame 24                                   | 0.001554241 | 0.028086871 | 2.14 | 0.646 | 0    |
| 1125 | C17orf57     | chromosome 17 open reading frame 57                                   | 0.001553086 | 0.028086871 | 0.61 | 0.660 | 0    |
| 1126 | ISG20        | interferon stimulated exonuclease gene 20kDa                          | 0.001564192 | 0.028204202 | 1.46 | 0.660 | 0    |
| 1127 | SCARNA17     | small Cajal body-specific RNA 17                                      | 0.001564587 | 0.028204202 | 0.44 | 0.663 | 0    |
| 1128 | ADARB1       | adenosine deaminase, RNA-specific, B1                                 | 0.001564896 | 0.028204202 | 1.61 | 0.674 | 0    |
| 1129 | CBFA2T3      | core-binding factor, runt domain, alpha subunit 2; translocated to, 3 | 0.001567123 | 0.028219316 | 1.51 | 0.647 | 0    |
| 1130 | C20orf24     | chromosome 20 open reading frame 24                                   | 0.001569473 | 0.02823663  | 7.68 | 0.633 | 0    |
| 1131 | C1orf187     | chromosome 1 open reading frame 187                                   | 0.001577881 | 0.028256778 | 2.00 | 0.661 | 0.01 |
| 1132 | HOPX         | HOP homeobox                                                          | 0.001576157 | 0.028256778 | 1.33 | 0.692 | 0.01 |
| 1133 | SORL1        | sortilin-related receptor, (DLR class) A repeats-containing           | 0.001574327 | 0.028256778 | 2.64 | 0.669 | 0    |
| 1134 | CCDC40       | coiled-coil domain containing 40                                      | 0.001576414 | 0.028256778 | 0.59 | 0.642 | 0    |
| 1135 | LEPROT       | leptin receptor overlapping transcript                                | 0.00157473  | 0.028256778 | 0.41 | 0.633 | 0    |
| 1136 | MACC1        | metastasis associated in colon cancer 1                               | 0.001578933 | 0.028256778 | 0.72 | 0.629 | 0    |
| 1137 | CPE          | carboxypeptidase E                                                    | 0.001583254 | 0.028309191 | 0.79 | 0.645 | 0    |
| 1138 | VPS53        | vacuolar protein sorting 53 homolog                                   | 0.001590922 | 0.028421312 | 0.45 | 0.676 | 0    |
| 1139 | TMEM170A     | transmembrane protein 170A                                            | 0.001597198 | 0.028433475 | 0.21 | 0.661 | 0    |
| 1140 | DUT          | deoxyuridine triphosphatase                                           | 0.001596097 | 0.028433475 | 0.29 | 0.644 | 0    |
| 1141 | SCARNA7      | small Cajal body-specific RNA 7                                       | 0.001594428 | 0.028433475 | 0.52 | 0.658 | 0    |
| 1142 | LOC441666    | zinc finger protein 91 pseudogene                                     | 0.001594935 | 0.028433475 | 0.53 | 0.668 | 0    |
| 1143 | ZNF141       | zinc finger protein 141                                               | 0.001606583 | 0.028575536 | 0.55 | 0.653 | 0    |
| 1144 | FBXO8        | F-box protein 8                                                       | 0.001612896 | 0.028662734 | 0.25 | 0.645 | 0    |
| 1145 | BATF         | basic leucine zipper transcription factor, ATF-like                   | 0.001617344 | 0.028679267 | 1.64 | 0.668 | 0    |
| 1146 | VTCN1        | V-set domain containing T cell activation inhibitor 1                 | 0.001618058 | 0.028679267 | 2.01 | 0.643 | 0    |
| 1147 | HIVEP2       | human immunodeficiency virus type I enhancer binding protein 2        | 0.001617284 | 0.028679267 | 1.88 | 0.647 | 0    |
| 1148 | PHYHD1       | phytanoyl-CoA dioxygenase domain containing 1                         | 0.001620252 | 0.028693142 | 2.92 | 0.621 | 0    |
| 1149 | PRR15        | proline rich 15                                                       | 0.001623698 | 0.028729141 | 0.41 | 0.640 | 0    |
| 1150 | CT47A11      | cancer/testis antigen family 47, member A11                           | 0.001625965 | 0.028744228 | 0.37 | 0.648 | 0    |
| 1151 | C8orf34      | chromosome 8 open reading frame 34                                    | 0.001638072 | 0.028872446 | 0.55 | 0.666 | 0    |
| 1152 | CRYM         | crystallin, mu                                                        | 0.001638898 | 0.028872446 | 1.70 | 0.657 | 0    |
| 1153 | APIP         | APAF1 interacting protein                                             | 0.001635843 | 0.028872446 | 0.50 | 0.629 | 0    |

|      |           |                                                                        |             |             |      |       |      |
|------|-----------|------------------------------------------------------------------------|-------------|-------------|------|-------|------|
| 1154 | ZNF85     | zinc finger protein 85                                                 | 0.001637154 | 0.028872446 | 0.55 | 0.657 | 0    |
| 1155 | PEX11A    | peroxisomal biogenesis factor 11 alpha                                 | 0.001642411 | 0.028884264 | 0.53 | 0.637 | 0    |
| 1156 | SRBD1     | S1 RNA binding domain 1                                                | 0.001641814 | 0.028884264 | 0.31 | 0.648 | 0    |
| 1157 | CLEC4A    | C-type lectin domain family 4, member A                                | 0.001645248 | 0.028893511 | 3.41 | 0.639 | 0    |
| 1158 | EGLN1     | egl nine homolog 1                                                     | 0.001645779 | 0.028893511 | 0.26 | 0.646 | 0    |
| 1159 | SYT7      | synaptotagmin VII                                                      | 0.001647849 | 0.028904893 | 2.20 | 0.641 | 0    |
| 1160 | FLJ38717  | FLJ38717 protein                                                       | 0.001649287 | 0.028905182 | 0.59 | 0.646 | 0    |
| 1161 | AP1M2     | adaptor-related protein complex 1, mu 2 subunit                        | 0.00165631  | 0.029000721 | 1.83 | 0.641 | 0    |
| 1162 | NOP16     | NOP16 nucleolar protein homolog                                        | 0.001657592 | 0.029000721 | 3.08 | 0.654 | 0    |
| 1163 | RBM20     | RNA binding motif protein 20                                           | 0.001662732 | 0.02906565  | 0.30 | 0.663 | 0    |
| 1164 | FBXO32    | F-box protein 32                                                       | 0.001669109 | 0.029152051 | 0.36 | 0.623 | 0    |
| 1165 | RHOB      | ras homolog gene family, member B                                      | 0.001671254 | 0.029164466 | 0.41 | 0.665 | 0    |
| 1166 | RNU2-2    | RNA, U2 small nuclear 2                                                | 0.001673928 | 0.029186069 | 0.70 | 0.623 | 0    |
| 1167 | GGTLC2    | gamma-glutamyltransferase light chain 2                                | 0.001685244 | 0.029358195 | 2.95 | 0.669 | 0    |
| 1168 | psiTPTE22 | TPTE pseudogene                                                        | 0.001694316 | 0.029490955 | 0.61 | 0.647 | 0    |
| 1169 | OR5P3     | olfactory receptor, family 5, subfamily P, member 3                    | 0.001699348 | 0.029553247 | 2.61 | 0.603 | 0    |
| 1170 | PAGE2     | P antigen family, member 2                                             | 0.001710973 | 0.029729984 | 2.14 | 0.634 | 0    |
| 1171 | OMA1      | OMA1 homolog, zinc metallopeptidase                                    | 0.001720861 | 0.029876271 | 0.34 | 0.655 | 0    |
| 1172 | CCR3      | chemokine (C-C motif) receptor 3                                       | 0.001732321 | 0.02999212  | 1.46 | 0.672 | 0    |
| 1173 | UBA5      | ubiquitin-like modifier activating enzyme 5                            | 0.001733435 | 0.02999212  | 3.20 | 0.627 | 0    |
| 1174 | C17orf28  | chromosome 17 open reading frame 28                                    | 0.001730759 | 0.02999212  | 1.49 | 0.655 | 0    |
| 1175 | ZBTB7B    | zinc finger and BTB domain containing 7B                               | 0.001731288 | 0.02999212  | 2.84 | 0.643 | 0    |
| 1176 | POLG2     | polymerase (DNA directed), gamma 2, accessory subunit                  | 0.001737278 | 0.030012631 | 2.39 | 0.650 | 0    |
| 1177 | SGMS2     | sphingomyelin synthase 2                                               | 0.001737573 | 0.030012631 | 0.54 | 0.625 | 0    |
| 1178 | PANX3     | pannexin 3                                                             | 0.001740085 | 0.030030496 | 0.47 | 0.660 | 0    |
| 1179 | SUMF2     | sulfatase modifying factor 2                                           | 0.001744628 | 0.03008336  | 0.49 | 0.643 | 0    |
| 1180 | ALKBH8    | alkB, alkylation repair homolog 8                                      | 0.001750251 | 0.030129215 | 0.42 | 0.650 | 0    |
| 1181 | BYSL      | bystin-like                                                            | 0.001749064 | 0.030129215 | 5.47 | 0.657 | 0    |
| 1182 | FGFBP2    | fibroblast growth factor binding protein 2                             | 0.001756435 | 0.030210081 | 1.27 | 0.641 | 0.01 |
| 1183 | C17orf46  | chromosome 17 open reading frame 46                                    | 0.001764243 | 0.03029347  | 0.45 | 0.637 | 0    |
| 1184 | EHF       | ets homologous factor                                                  | 0.001764263 | 0.03029347  | 1.58 | 0.629 | 0    |
| 1185 | RAI14     | retinoic acid induced 14                                               | 0.001774114 | 0.030436901 | 1.58 | 0.638 | 0    |
| 1186 | FAM101B   | family with sequence similarity 101, member B                          | 0.001779284 | 0.030499867 | 1.38 | 0.664 | 0    |
| 1187 | SLC35F2   | solute carrier family 35, member F2                                    | 0.001780982 | 0.03050326  | 1.73 | 0.652 | 0    |
| 1188 | SLC24A4   | solute carrier family 24                                               | 0.001783131 | 0.030514354 | 0.51 | 0.651 | 0    |
| 1189 | CDK6      | cyclin-dependent kinase 6                                              | 0.001791046 | 0.03062402  | 1.64 | 0.686 | 0    |
| 1190 | IL1RAP    | interleukin 1 receptor accessory protein                               | 0.001799462 | 0.030742061 | 2.51 | 0.676 | 0    |
| 1191 | SHPRH     | SNF2 histone linker PHD RING helicase                                  | 0.001805602 | 0.030821064 | 0.41 | 0.647 | 0    |
| 1192 | IGFALS    | insulin-like growth factor binding protein, acid labile subunit        | 0.00181061  | 0.030880618 | 1.49 | 0.646 | 0.01 |
| 1193 | C21orf88  | chromosome 21 open reading frame 88                                    | 0.001819754 | 0.03096481  | 0.40 | 0.649 | 0    |
| 1194 | ZCCHC7    | zinc finger, CCHC domain containing 7                                  | 0.001821639 | 0.03096481  | 0.50 | 0.633 | 0    |
| 1195 | LRRC25    | leucine rich repeat containing 25                                      | 0.00181952  | 0.03096481  | 2.74 | 0.643 | 0    |
| 1196 | ZNF782    | zinc finger protein 782                                                | 0.001820781 | 0.03096481  | 0.44 | 0.662 | 0    |
| 1197 | OSGIN1    | oxidative stress induced growth inhibitor 1                            | 0.00184244  | 0.031292236 | 1.89 | 0.623 | 0    |
| 1198 | IL8       | interleukin 8                                                          | 0.001844318 | 0.031297991 | 1.38 | 0.659 | 0    |
| 1199 | IL1RL1    | interleukin 1 receptor-like 1                                          | 0.001858062 | 0.031485306 | 1.61 | 0.655 | 0    |
| 1200 | SPIRE2    | spire homolog 2                                                        | 0.001858454 | 0.031485306 | 0.74 | 0.639 | 0    |
| 1201 | FXYD3     | FXYD domain containing ion transport regulator 3                       | 0.001863601 | 0.031528115 | 1.58 | 0.651 | 0    |
| 1202 | NSL1      | NSL1, MIND kinetochore complex component, homolog                      | 0.001865633 | 0.031528115 | 0.36 | 0.643 | 0    |
| 1203 | XYLB      | xylulokinase homolog                                                   | 0.001864195 | 0.031528115 | 1.88 | 0.642 | 0    |
| 1204 | PMM2      | phosphomannomutase 2                                                   | 0.001869327 | 0.031564299 | 4.07 | 0.626 | 0    |
| 1205 | CD46      | CD46 molecule, complement regulatory protein                           | 0.001874136 | 0.031619245 | 0.53 | 0.670 | 0    |
| 1206 | SLC16A6   | solute carrier family 16, member 6 (monocarboxylic acid transporter 7) | 0.001880594 | 0.031659039 | 2.40 | 0.651 | 0    |
| 1207 | CAMP      | cathelicidin antimicrobial peptide                                     | 0.001887279 | 0.031659039 | 0.61 | 0.653 | 0    |
| 1208 | MIF4GD    | MIF4G domain containing                                                | 0.00187829  | 0.031659039 | 0.47 | 0.631 | 0    |
| 1209 | PTPN7     | protein tyrosine phosphatase, non-receptor type 7                      | 0.0018863   | 0.031659039 | 1.53 | 0.664 | 0    |
| 1210 | TEX14     | testis expressed 14                                                    | 0.001885407 | 0.031659039 | 0.70 | 0.659 | 0    |
| 1211 | ZNF585B   | zinc finger protein 585B                                               | 0.001881686 | 0.031659039 | 0.36 | 0.646 | 0    |
| 1212 | XRCC4     | X-ray repair complementing defective repair in Chinese hamster cells 4 | 0.001887396 | 0.031659039 | 0.40 | 0.656 | 0    |
| 1213 | LOC550112 | hypothetical LOC550112                                                 | 0.001891464 | 0.031701122 | 0.33 | 0.644 | 0    |
| 1214 | KLHL15    | kelch-like 15                                                          | 0.001906641 | 0.031929166 | 0.64 | 0.663 | 0.01 |

|      |              |                                                                                       |             |             |      |       |   |
|------|--------------|---------------------------------------------------------------------------------------|-------------|-------------|------|-------|---|
| 1215 | RCBTB2       | regulator of chromosome condensation (RCC1) and BTB (POZ) domain containing protein 2 | 0.00190928  | 0.031932176 | 3.03 | 0.658 | 0 |
| 1216 | TRPC6        | transient receptor potential cation channel, subfamily C, member 6                    | 0.001911533 | 0.031932176 | 0.49 | 0.665 | 0 |
| 1217 | CRELD2       | cysteine-rich with EGF-like domains 2                                                 | 0.001910735 | 0.031932176 | 7.10 | 0.673 | 0 |
| 1218 | ZCCHC14      | zinc finger, CCHC domain containing 14                                                | 0.001915075 | 0.031965094 | 3.20 | 0.663 | 0 |
| 1219 | TMEM220      | transmembrane protein 220                                                             | 0.001917538 | 0.031979933 | 4.43 | 0.638 | 0 |
| 1220 | HMH1         | histocompatibility (minor) HB-1                                                       | 0.001921548 | 0.032020551 | 0.58 | 0.645 | 0 |
| 1221 | ZMYND15      | zinc finger, MYND-type containing 15                                                  | 0.001924168 | 0.032037942 | 0.58 | 0.644 | 0 |
| 1222 | ZNF546       | zinc finger protein 546                                                               | 0.001930934 | 0.032124287 | 0.43 | 0.659 | 0 |
| 1223 | TNNI2        | troponin I type 2                                                                     | 0.001932734 | 0.032127948 | 0.51 | 0.647 | 0 |
| 1224 | TFB2M        | transcription factor B2, mitochondrial                                                | 0.001939506 | 0.032186632 | 3.59 | 0.634 | 0 |
| 1225 | ASB1         | ankyrin repeat and SOCS box-containing 1                                              | 0.001941891 | 0.032186632 | 4.05 | 0.644 | 0 |
| 1226 | LOC645553    | cDNA clone IMAGE:5478640, partial cds                                                 | 0.001939474 | 0.032186632 | 0.61 | 0.633 | 0 |
| 1227 | MRPL1        | mitochondrial ribosomal protein L1                                                    | 0.001942597 | 0.032186632 | 0.47 | 0.648 | 0 |
| 1228 | ZNF728       | zinc finger protein 728                                                               | 0.001952219 | 0.032319716 | 0.55 | 0.650 | 0 |
| 1229 | NCOA6        | nuclear receptor coactivator 6                                                        | 0.001955681 | 0.032350691 | 2.73 | 0.668 | 0 |
| 1230 | GRAMD4       | GRAM domain containing 4                                                              | 0.001958064 | 0.032363774 | 3.41 | 0.640 | 0 |
| 1231 | EPB41L4A     | erythrocyte membrane protein band 4.1 like 4A                                         | 0.001975315 | 0.032569464 | 0.65 | 0.622 | 0 |
| 1232 | RAB35        | RAB35, member RAS oncogene family                                                     | 0.001973886 | 0.032569464 | 5.91 | 0.659 | 0 |
| 1233 | ACOXL        | acyl-Coenzyme A oxidase-like                                                          | 0.001972412 | 0.032569464 | 1.58 | 0.641 | 0 |
| 1234 | PARD3        | par-3 partitioning defective 3 homolog                                                | 0.001984243 | 0.032690156 | 1.48 | 0.674 | 0 |
| 1235 | DNAJB5       | DnaJ (Hsp40) homolog, subfamily B, member 5                                           | 0.001986555 | 0.032701758 | 2.34 | 0.672 | 0 |
| 1236 | CCDC90A      | coiled-coil domain containing 90A                                                     | 0.001990923 | 0.032747138 | 5.00 | 0.644 | 0 |
| 1237 | DSG2         | desmoglein 2                                                                          | 0.001993393 | 0.032761269 | 1.82 | 0.648 | 0 |
| 1238 | MAPK8        | mitogen-activated protein kinase 8                                                    | 0.001999347 | 0.032832577 | 0.58 | 0.646 | 0 |
| 1239 | RPL23AP32    | ribosomal protein L23a pseudogene 32                                                  | 0.002013606 | 0.033003038 | 1.58 | 0.643 | 0 |
| 1240 | TMEM63C      | transmembrane protein 63C                                                             | 0.002014598 | 0.033003038 | 1.43 | 0.643 | 0 |
| 1241 | RNF24        | ring finger protein 24                                                                | 0.00201451  | 0.033003038 | 2.80 | 0.647 | 0 |
| 1242 | CCL1         | chemokine (C-C motif) ligand 1                                                        | 0.002024151 | 0.033132849 | 1.61 | 0.643 | 0 |
| 1243 | C5orf4       | chromosome 5 open reading frame 4                                                     | 0.002027467 | 0.033150065 | 0.46 | 0.643 | 0 |
| 1244 | ANGPT4       | angiotensinogen 4                                                                     | 0.002028464 | 0.033150065 | 0.63 | 0.658 | 0 |
| 1245 | LAYN         | layilin                                                                               | 0.002030142 | 0.03315084  | 1.61 | 0.642 | 0 |
| 1246 | AMN          | amionless homolog                                                                     | 0.002038695 | 0.033263781 | 0.62 | 0.632 | 0 |
| 1247 | RASL10B      | RAS-like, family 10, member B                                                         | 0.002043449 | 0.033314615 | 0.56 | 0.654 | 0 |
| 1248 | C15orf38     | chromosome 15 open reading frame 38                                                   | 0.002053445 | 0.033450752 | 0.49 | 0.653 | 0 |
| 1249 | DCHS1        | dachsous 1                                                                            | 0.002056103 | 0.033467232 | 1.74 | 0.655 | 0 |
| 1250 | SERPINA1     | serpin peptidase inhibitor, clade A                                                   | 0.00206701  | 0.033590984 | 0.48 | 0.661 | 0 |
| 1251 | KPNA2        | karyopherin alpha 2 (RAG cohort 1, importin alpha 1)                                  | 0.002066026 | 0.033590984 | 4.97 | 0.655 | 0 |
| 1252 | DNAJC5       | DnaJ (Hsp40) homolog, subfamily C, member 5                                           | 0.00206877  | 0.033592727 | 6.12 | 0.652 | 0 |
| 1253 | SRPX2        | sushi-repeat-containing protein, X-linked 2                                           | 0.002072219 | 0.033621881 | 1.53 | 0.669 | 0 |
| 1254 | HSP90B1      | heat shock protein 90kDa beta (Grp94), member 1                                       | 0.002074572 | 0.033633211 | 3.21 | 0.642 | 0 |
| 1255 | RBM3         | RNA binding motif (RNP1, RRM) protein 3                                               | 0.002082092 | 0.033728226 | 0.50 | 0.601 | 0 |
| 1256 | ITGA7        | integrin, alpha 7                                                                     | 0.002083834 | 0.033729576 | 2.40 | 0.639 | 0 |
| 1257 | ZNF479       | zinc finger protein 479                                                               | 0.002086396 | 0.033744184 | 0.58 | 0.665 | 0 |
| 1258 | FCER2        | Fc fragment of IgE, low affinity II, receptor for (CD23)                              | 0.002090355 | 0.033781326 | 1.54 | 0.655 | 0 |
| 1259 | DUSP13       | dual specificity phosphatase 13                                                       | 0.002105339 | 0.033977305 | 1.65 | 0.635 | 0 |
| 1260 | EIF4EBP2     | eukaryotic translation initiation factor 4E binding protein 2                         | 0.002105824 | 0.033977305 | 0.24 | 0.639 | 0 |
| 1261 | PTP4A2       | protein tyrosine phosphatase type IVA, member 2                                       | 0.002130127 | 0.034342169 | 0.45 | 0.610 | 0 |
| 1262 | SRPK1        | SFRS protein kinase 1                                                                 | 0.002135729 | 0.034405204 | 4.10 | 0.649 | 0 |
| 1263 | CDH23        | cadherin-like 23                                                                      | 0.002145683 | 0.034426095 | 0.57 | 0.660 | 0 |
| 1264 | SLAMF7       | SLAM family member 7                                                                  | 0.002144693 | 0.034426095 | 1.39 | 0.641 | 0 |
| 1265 | TDRD1        | tudor domain containing 1                                                             | 0.002140613 | 0.034426095 | 0.58 | 0.656 | 0 |
| 1266 | PLA2G2D      | phospholipase A2, group IID                                                           | 0.002149959 | 0.034426095 | 1.61 | 0.668 | 0 |
| 1267 | AKAP4        | A kinase                                                                              | 0.002150573 | 0.034426095 | 0.48 | 0.666 | 0 |
| 1268 | PLAGL2       | pleiomorphic adenoma gene-like 2                                                      | 0.002143436 | 0.034426095 | 2.31 | 0.649 | 0 |
| 1269 | TMED7-TICAM2 | TMED7-TICAM2 read-through transcript                                                  | 0.002150221 | 0.034426095 | 0.40 | 0.662 | 0 |
| 1270 | CCNC         | cyclin C                                                                              | 0.002139385 | 0.034426095 | 0.44 | 0.659 | 0 |
| 1271 | DLG1         | discs, large homolog 1                                                                | 0.002153894 | 0.03445213  | 0.55 | 0.649 | 0 |
| 1272 | KIAA0368     | KIAA0368                                                                              | 0.002161475 | 0.034546222 | 0.30 | 0.635 | 0 |
| 1273 | DOK4         | docking protein 4                                                                     | 0.002164049 | 0.034560189 | 1.62 | 0.620 | 0 |
| 1274 | MYO6         | myosin VI                                                                             | 0.0021671   | 0.034576445 | 0.64 | 0.635 | 0 |
| 1275 | KBTBD2       | kelch repeat and BTB (POZ) domain containing 2                                        | 0.002170169 | 0.034576445 | 2.60 | 0.644 | 0 |

|      |           |                                                                  |             |             |      |       |      |
|------|-----------|------------------------------------------------------------------|-------------|-------------|------|-------|------|
| 1276 | IPO4      | importin 4                                                       | 0.002168676 | 0.034576445 | 2.65 | 0.638 | 0    |
| 1277 | BCL2L11   | BCL2-like 11                                                     | 0.002172023 | 0.034578886 | 2.42 | 0.668 | 0    |
| 1278 | SEMA3B    | sema domain, immunoglobulin domain                               | 0.002187378 | 0.034796082 | 1.90 | 0.632 | 0    |
| 1279 | RMRP      | RNA component of mitochondrial RNA processing endoribonuclease   | 0.002189835 | 0.034807933 | 0.70 | 0.648 | 0    |
| 1280 | TBC1D10A  | TBC1 domain family, member 10A                                   | 0.002198849 | 0.034923905 | 0.17 | 0.667 | 0    |
| 1281 | RGS20     | regulator of G-protein signaling 20                              | 0.002206527 | 0.034963916 | 1.65 | 0.623 | 0    |
| 1282 | C8B       | complement component 8, beta polypeptide                         | 0.002205251 | 0.034963916 | 0.81 | 0.651 | 0    |
| 1283 | ZNF808    | zinc finger protein 808                                          | 0.0022035   | 0.034963916 | 0.43 | 0.650 | 0    |
| 1284 | TRIM2     | tripartite motif-containing 2                                    | 0.002212455 | 0.035012453 | 1.77 | 0.606 | 0    |
| 1285 | ZNF676    | zinc finger protein 676                                          | 0.002213035 | 0.035012453 | 0.60 | 0.655 | 0    |
| 1286 | DNAJC17   | DnaJ (Hsp40) homolog, subfamily C, member 17                     | 0.002222846 | 0.0351203   | 0.50 | 0.624 | 0    |
| 1287 | GRID1     | glutamate receptor, ionotropic, delta 1                          | 0.002225034 | 0.0351203   | 1.54 | 0.612 | 0    |
| 1288 | UOX       | urate oxidase                                                    | 0.002224117 | 0.0351203   | 2.14 | 0.609 | 0    |
| 1289 | CTSA      | cathepsin A                                                      | 0.0022292   | 0.03515876  | 3.34 | 0.641 | 0    |
| 1290 | NPHP1     | nephronophthisis 1                                               | 0.002234197 | 0.035210252 | 0.54 | 0.633 | 0    |
| 1291 | AOC3      | amine oxidase, copper containing 3 (vascular adhesion protein 1) | 0.002237993 | 0.035242755 | 0.74 | 0.642 | 0    |
| 1292 | FLRT3     | fibronectin leucine rich transmembrane protein 3                 | 0.002242823 | 0.035291485 | 1.72 | 0.610 | 0    |
| 1293 | HECW2     | HECT, C2 and WW domain containing E3 ubiquitin protein ligase 2  | 0.002250054 | 0.035350547 | 1.74 | 0.664 | 0.01 |
| 1294 | C10orf47  | chromosome 10 open reading frame 47                              | 0.002248412 | 0.035350547 | 1.67 | 0.648 | 0    |
| 1295 | TNK1      | tyrosine kinase, non-receptor, 1                                 | 0.002256254 | 0.035420578 | 0.43 | 0.629 | 0    |
| 1296 | PDLIM3    | PDZ and LIM domain 3                                             | 0.00225923  | 0.035439922 | 1.40 | 0.627 | 0    |
| 1297 | ANXA8L2   | annexin A8-like 2                                                | 0.002266176 | 0.03552148  | 1.60 | 0.660 | 0    |
| 1298 | ZNF701    | zinc finger protein 701                                          | 0.00228276  | 0.035753855 | 0.45 | 0.658 | 0    |
| 1299 | FOLR2     | folate receptor 2                                                | 0.00229784  | 0.035962348 | 1.92 | 0.644 | 0    |
| 1300 | DYDC2     | DPY30 domain containing 2                                        | 0.002306256 | 0.036066302 | 1.94 | 0.615 | 0    |
| 1301 | MS4A15    | membrane-spanning 4-domains, subfamily A, member 15              | 0.002309737 | 0.036092976 | 1.64 | 0.619 | 0    |
| 1302 | SLC39A14  | solute carrier family 39                                         | 0.002314336 | 0.036137064 | 1.58 | 0.651 | 0    |
| 1303 | C14orf181 | chromosome 14 open reading frame 181                             | 0.002323247 | 0.036248352 | 0.62 | 0.622 | 0    |
| 1304 | OSBPL6    | oxysterol binding protein-like 6                                 | 0.002334966 | 0.036403268 | 1.92 | 0.670 | 0    |
| 1305 | KIAA1841  | KIAA1841                                                         | 0.002339277 | 0.036442528 | 0.52 | 0.652 | 0    |
| 1306 | IGBP1     | immunoglobulin (CD79A) binding protein 1                         | 0.002351148 | 0.036496953 | 0.16 | 0.659 | 0    |
| 1307 | CLCN4     | chloride channel 4                                               | 0.00234757  | 0.036496953 | 0.58 | 0.640 | 0    |
| 1308 | MOC53     | molybdenum cofactor synthesis 3                                  | 0.00235249  | 0.036496953 | 0.68 | 0.631 | 0    |
| 1309 | NBPF3     | neuroblastoma breakpoint family, member 3                        | 0.002353542 | 0.036496953 | 0.50 | 0.645 | 0    |
| 1310 | FAM132A   | family with sequence similarity 132, member A                    | 0.002349582 | 0.036496953 | 1.76 | 0.640 | 0    |
| 1311 | TOMM20L   | translocase of outer mitochondrial membrane 20 homolog           | 0.00235005  | 0.036496953 | 0.47 | 0.642 | 0    |
| 1312 | ZIK1      | zinc finger protein interacting with K protein 1 homolog         | 0.002355796 | 0.036504057 | 0.32 | 0.638 | 0    |
| 1313 | KRTAP23-1 | keratin associated protein 23-1                                  | 0.002359246 | 0.036514267 | 0.55 | 0.643 | 0    |
| 1314 | MEGF11    | multiple EGF-like-domains 11                                     | 0.002360047 | 0.036514267 | 0.40 | 0.644 | 0    |
| 1315 | KLHL5     | kelch-like 5                                                     | 0.002363188 | 0.03653506  | 2.39 | 0.661 | 0    |
| 1316 | FFAR3     | free fatty acid receptor 3                                       | 0.002366625 | 0.036540517 | 1.38 | 0.661 | 0    |
| 1317 | TRIB1     | tribbles homolog 1                                               | 0.002371321 | 0.036540517 | 3.02 | 0.639 | 0    |
| 1318 | C10orf35  | chromosome 10 open reading frame 35                              | 0.002372274 | 0.036540517 | 0.39 | 0.669 | 0    |
| 1319 | RNF168    | ring finger protein 168                                          | 0.002372527 | 0.036540517 | 0.35 | 0.639 | 0    |
| 1320 | LOC728208 | hypothetical protein LOC728208                                   | 0.002368468 | 0.036540517 | 0.53 | 0.657 | 0    |
| 1321 | MAP2K3    | mitogen-activated protein kinase kinase 3                        | 0.002376354 | 0.036571739 | 2.70 | 0.643 | 0    |
| 1322 | EPM2AIP1  | EPM2A (laforin) interacting protein 1                            | 0.002412419 | 0.037070654 | 1.45 | 0.645 | 0.01 |
| 1323 | CDK5R2    | cyclin-dependent kinase 5, regulatory subunit 2 (p39)            | 0.00241235  | 0.037070654 | 0.57 | 0.662 | 0    |
| 1324 | HSD17B7   | hydroxysteroid (17-beta) dehydrogenase 7                         | 0.002417043 | 0.037085652 | 0.26 | 0.672 | 0    |
| 1325 | ZNF562    | zinc finger protein 562                                          | 0.002415704 | 0.037085652 | 3.56 | 0.649 | 0    |
| 1326 | SCARNA10  | small Cajal body-specific RNA 10                                 | 0.002420775 | 0.037114893 | 0.60 | 0.654 | 0    |
| 1327 | TSHZ3     | teashirt zinc finger homeobox 3                                  | 0.002434309 | 0.037294272 | 1.55 | 0.649 | 0    |
| 1328 | CYP3A4    | cytochrome P450, family 3, subfamily A, polypeptide 4            | 0.002437639 | 0.037309461 | 0.58 | 0.648 | 0    |
| 1329 | C7orf40   | chromosome 7 open reading frame 40                               | 0.002438971 | 0.037309461 | 3.08 | 0.660 | 0    |
| 1330 | IGLL1     | immunoglobulin lambda-like polypeptide 1                         | 0.00245677  | 0.037507418 | 1.34 | 0.653 | 0    |
| 1331 | NUAK2     | NUAK family, SNF1-like kinase, 2                                 | 0.002455443 | 0.037507418 | 1.68 | 0.674 | 0    |
| 1332 | FRRS1     | ferric-chelate reductase 1                                       | 0.002457446 | 0.037507418 | 0.62 | 0.639 | 0    |
| 1333 | ZNF876P   | zinc finger protein 876                                          | 0.002464628 | 0.037588817 | 0.36 | 0.652 | 0    |
| 1334 | LOC222070 | cDNA FLJ32004 fis, clone NT2RP7009429                            | 0.002471075 | 0.037630679 | 0.26 | 0.659 | 0    |
| 1335 | HLA-B     | major histocompatibility complex, class I, B                     | 0.002470729 | 0.037630679 | 0.35 | 0.652 | 0    |
| 1336 | HM13      | histocompatibility (minor) 13                                    | 0.002475327 | 0.037639042 | 2.82 | 0.649 | 0    |

|      |           |                                                                                                                |             |             |      |       |      |
|------|-----------|----------------------------------------------------------------------------------------------------------------|-------------|-------------|------|-------|------|
| 1337 | TRIM25    | tripartite motif-containing 25                                                                                 | 0.002473791 | 0.037639042 | 2.55 | 0.631 | 0    |
| 1338 | HSPD1     | heat shock 60kDa protein 1 (chaperonin) (HSPD1), nuclear gene encoding                                         | 0.002477538 | 0.037644512 | 3.83 | 0.636 | 0    |
| 1339 | HOXA10    | homeobox A10                                                                                                   | 0.002480018 | 0.037654042 | 0.56 | 0.623 | 0    |
| 1340 | FLJ30698  | cDNA FLJ30698 fis, clone FCBBF2000825                                                                          | 0.002484587 | 0.037695258 | 0.39 | 0.648 | 0    |
| 1341 | SFTPA2    | surfactant protein A2                                                                                          | 0.002486946 | 0.037702911 | 1.68 | 0.639 | 0    |
| 1342 | CASP3     | caspase 3, apoptosis-related cysteine peptidase                                                                | 0.002491747 | 0.037747554 | 3.85 | 0.662 | 0    |
| 1343 | CDK3      | cyclin-dependent kinase 3                                                                                      | 0.002497287 | 0.037803308 | 0.62 | 0.633 | 0    |
| 1344 | KIR3DL2   | killer cell immunoglobulin-like receptor, three domains, long cytoplasmic tail, 2                              | 0.002500774 | 0.037827929 | 0.32 | 0.656 | 0    |
| 1345 | COMT      | catechol-O-methyltransferase                                                                                   | 0.002502936 | 0.037832477 | 0.42 | 0.654 | 0    |
| 1346 | RBMS2     | RNA binding motif, single stranded interacting protein 2                                                       | 0.002518622 | 0.038041294 | 0.43 | 0.645 | 0    |
| 1347 | FAM26F    | family with sequence similarity 26, member F                                                                   | 0.002523003 | 0.038079179 | 1.51 | 0.657 | 0    |
| 1348 | ARF6      | ADP-ribosylation factor 6                                                                                      | 0.002531966 | 0.038157793 | 2.39 | 0.636 | 0    |
| 1349 | HOXA9     | homeobox A9                                                                                                    | 0.002530254 | 0.038157793 | 0.59 | 0.628 | 0    |
| 1350 | ABTB2     | ankyrin repeat and BTB (POZ) domain containing 2                                                               | 0.002545188 | 0.03832864  | 2.02 | 0.642 | 0    |
| 1351 | CFH       | complement factor H                                                                                            | 0.0025582   | 0.038467606 | 1.49 | 0.668 | 0    |
| 1352 | PDCL      | phosducin-like                                                                                                 | 0.002556578 | 0.038467606 | 0.52 | 0.626 | 0    |
| 1353 | ZNF804A   | zinc finger protein 804A                                                                                       | 0.002562881 | 0.038477526 | 0.42 | 0.665 | 0.02 |
| 1354 | TBC1D10C  | TBC1 domain family, member 10C                                                                                 | 0.002563784 | 0.038477526 | 0.34 | 0.624 | 0    |
| 1355 | ULBP1     | UL16 binding protein 1                                                                                         | 0.002565514 | 0.038477526 | 1.55 | 0.655 | 0    |
| 1356 | SLC16A9   | solute carrier family 16, member 9 (monocarboxylic acid transporter 9)                                         | 0.002566643 | 0.038477526 | 2.18 | 0.665 | 0    |
| 1357 | CDKN1C    | cyclin-dependent kinase inhibitor 1C                                                                           | 0.002578418 | 0.038628769 | 1.39 | 0.633 | 0    |
| 1358 | FN3K      | fructosamine 3 kinase                                                                                          | 0.00258097  | 0.038638525 | 0.61 | 0.646 | 0    |
| 1359 | UBFD1     | ubiquitin family domain containing 1                                                                           | 0.002585203 | 0.038644978 | 3.45 | 0.655 | 0    |
| 1360 | JPH1      | junctophilin 1                                                                                                 | 0.002584008 | 0.038644978 | 1.79 | 0.623 | 0    |
| 1361 | LIM2      | lens intrinsic membrane protein 2, 19kDa                                                                       | 0.002597314 | 0.038797501 | 1.56 | 0.624 | 0    |
| 1362 | SAMHD1    | SAM domain and HD domain 1                                                                                     | 0.002603353 | 0.03885915  | 0.41 | 0.659 | 0    |
| 1363 | VWCE      | von Willebrand factor C and EGF domains                                                                        | 0.002610849 | 0.038942446 | 0.31 | 0.671 | 0    |
| 1364 | DDA1      | DET1 and DDB1 associated 1                                                                                     | 0.002615142 | 0.038961277 | 0.28 | 0.633 | 0    |
| 1365 | VSIG10    | V-set and immunoglobulin domain containing 10                                                                  | 0.002615944 | 0.038961277 | 0.60 | 0.627 | 0    |
| 1366 | LY6G6D    | lymphocyte antigen 6 complex, locus G6D                                                                        | 0.002619979 | 0.038992804 | 0.63 | 0.634 | 0    |
| 1367 | TP53BP2   | tumor protein p53 binding protein, 2                                                                           | 0.002625617 | 0.038998815 | 2.24 | 0.663 | 0    |
| 1368 | RHPN2     | rhopilin, Rho GTPase binding protein 2                                                                         | 0.002624705 | 0.038998815 | 1.72 | 0.633 | 0    |
| 1369 | SNORD3B-1 | small nucleolar RNA, C/D box 3B-1                                                                              | 0.002626138 | 0.038998815 | 0.58 | 0.634 | 0    |
| 1370 | GLTP      | glycolipid transfer protein                                                                                    | 0.002630428 | 0.039034015 | 0.53 | 0.631 | 0    |
| 1371 | UIMC1     | ubiquitin interaction motif containing 1                                                                       | 0.002643361 | 0.039197319 | 2.99 | 0.646 | 0    |
| 1372 | FCRL1     | Fc receptor-like 1                                                                                             | 0.002646122 | 0.039209662 | 0.63 | 0.628 | 0    |
| 1373 | DAPK2     | death-associated protein kinase 2                                                                              | 0.002664215 | 0.039449016 | 1.40 | 0.675 | 0    |
| 1374 | APC       | adenomatous polyposis coli                                                                                     | 0.002666679 | 0.03945675  | 0.52 | 0.646 | 0    |
| 1375 | ICOSLG    | ICOS ligand Precursor (B7 homolog 2)(B7-H2)(B7-like protein GI50)(B7-related protein 1)(B7RP-1)(CD275 antigen) | 0.00266941  | 0.039468442 | 1.84 | 0.673 | 0    |
| 1376 | ACO1      | aconitase 1, soluble                                                                                           | 0.002679776 | 0.039578058 | 0.66 | 0.640 | 0    |
| 1377 | EVX1      | even-skipped homeobox 1                                                                                        | 0.002682664 | 0.039578058 | 0.62 | 0.639 | 0    |
| 1378 | CYP2B6    | cytochrome P450, family 2, subfamily B, polypeptide 6                                                          | 0.002680791 | 0.039578058 | 0.55 | 0.638 | 0    |
| 1379 | ACER2     | alkaline ceramidase 2                                                                                          | 0.002688696 | 0.039638278 | 0.52 | 0.623 | 0    |
| 1380 | TPD52L1   | tumor protein D52-like 1                                                                                       | 0.002697657 | 0.039741564 | 0.73 | 0.652 | 0    |
| 1381 | ECSCR     | endothelial cell-specific chemotaxis regulator                                                                 | 0.002700469 | 0.039754184 | 0.73 | 0.620 | 0    |
| 1382 | EHD4      | EH-domain containing 4                                                                                         | 0.002713165 | 0.039895777 | 0.41 | 0.631 | 0    |
| 1383 | GNAO1     | guanine nucleotide binding protein                                                                             | 0.002714012 | 0.039895777 | 0.65 | 0.624 | 0    |
| 1384 | MT1L      | metallothionein 1L                                                                                             | 0.00273797  | 0.040218879 | 2.31 | 0.629 | 0    |
| 1385 | S100A13   | S100 calcium binding protein A13                                                                               | 0.002741597 | 0.040243087 | 0.60 | 0.608 | 0    |
| 1386 | MAP4      | microtubule-associated protein 4                                                                               | 0.00274498  | 0.04026367  | 0.51 | 0.617 | 0    |
| 1387 | ALDH3A2   | aldehyde dehydrogenase 3 family, member A2                                                                     | 0.002747521 | 0.040271884 | 0.46 | 0.641 | 0    |
| 1388 | N4BP2L1   | NEDD4 binding protein 2-like 1                                                                                 | 0.002754932 | 0.04035142  | 0.42 | 0.647 | 0    |
| 1389 | PSMD1     | proteasome (prosome, macropain) 26S subunit, non-ATPase, 1                                                     | 0.002766516 | 0.040491913 | 5.70 | 0.631 | 0    |
| 1390 | TP53TG3   | TP53 target 3                                                                                                  | 0.002784331 | 0.040723349 | 0.53 | 0.641 | 0    |
| 1391 | DUSP5     | dual specificity phosphatase 5                                                                                 | 0.002796377 | 0.040811443 | 1.84 | 0.650 | 0    |
| 1392 | C8A       | complement component 8, alpha polypeptide                                                                      | 0.002792537 | 0.040811443 | 0.72 | 0.651 | 0    |
| 1393 | MACROD2   | MACRO domain containing 2                                                                                      | 0.002795306 | 0.040811443 | 1.75 | 0.614 | 0    |
| 1394 | PLOD2     | procollagen-lysine, 2-oxoglutarate 5-dioxygenase 2                                                             | 0.002799204 | 0.040823403 | 1.59 | 0.634 | 0    |
| 1395 | CDH5      | cadherin 5, type 2                                                                                             | 0.002813523 | 0.040914825 | 0.28 | 0.643 | 0    |
| 1396 | SLC25A4   | solute carrier family 25 (mitochondrial carrier; adenine nucleotide translocator), member 4                    | 0.002812687 | 0.040914825 | 1.78 | 0.640 | 0    |
| 1397 | EXOC4     | exocyst complex component 4                                                                                    | 0.002812729 | 0.040914825 | 0.45 | 0.635 | 0    |



|      |              |                                                                                                        |             |             |      |       |   |
|------|--------------|--------------------------------------------------------------------------------------------------------|-------------|-------------|------|-------|---|
| 1398 | PTCD3        | Pentatricopeptide repeat domain 3                                                                      | 0.002811668 | 0.040914825 | 0.50 | 0.642 | 0 |
| 1399 | DYX1C1       | dyslexia susceptibility 1 candidate 1                                                                  | 0.002817543 | 0.040943997 | 0.62 | 0.617 | 0 |
| 1400 | CACNA1C      | calcium channel, voltage-dependent, L type, alpha 1C subunit                                           | 0.002822824 | 0.040991432 | 0.63 | 0.635 | 0 |
| 1401 | ZNF799       | zinc finger protein 799                                                                                | 0.002828718 | 0.041047712 | 0.39 | 0.641 | 0 |
| 1402 | ME2          | malic enzyme 2, NAD(+)-dependent, mitochondrial                                                        | 0.002835674 | 0.041080564 | 4.79 | 0.646 | 0 |
| 1403 | C7orf53      | chromosome 7 open reading frame 53                                                                     | 0.002837208 | 0.041080564 | 1.66 | 0.692 | 0 |
| 1404 | HOXA5        | homeobox A5                                                                                            | 0.002839065 | 0.041080564 | 0.58 | 0.627 | 0 |
| 1405 | HIST2H2AC    | histone cluster 2, H2ac                                                                                | 0.002835032 | 0.041080564 | 0.59 | 0.641 | 0 |
| 1406 | NKG7         | natural killer cell group 7 sequence                                                                   | 0.002842954 | 0.041107581 | 1.33 | 0.651 | 0 |
| 1407 | ZNF486       | zinc finger protein 486                                                                                | 0.002856034 | 0.041267361 | 0.63 | 0.662 | 0 |
| 1408 | TSPAN19      | tetraspanin 19                                                                                         | 0.002859083 | 0.041282075 | 1.80 | 0.625 | 0 |
| 1409 | LOC100128551 | cDNA FLJ43158 fis, clone ERLTF2000324.                                                                 | 0.002862844 | 0.041307036 | 2.07 | 0.616 | 0 |
| 1410 | BTD          | biotinidase                                                                                            | 0.00287339  | 0.041373051 | 0.56 | 0.638 | 0 |
| 1411 | RPAP2        | RNA polymerase II associated protein 2                                                                 | 0.00287298  | 0.041373051 | 0.25 | 0.645 | 0 |
| 1412 | NR2C1        | nuclear receptor subfamily 2, group C, member 1                                                        | 0.002873524 | 0.041373051 | 0.41 | 0.650 | 0 |
| 1413 | C14orf167    | chromosome 14 open reading frame 167                                                                   | 0.002894626 | 0.041602499 | 0.26 | 0.675 | 0 |
| 1414 | OR2A9P       | olfactory receptor, family 2, subfamily A, member 9 pseudogene                                         | 0.002894729 | 0.041602499 | 0.70 | 0.629 | 0 |
| 1415 | NDST2        | N-deacetylase/N-sulfotransferase (heparan glucosaminyll) 2                                             | 0.002895599 | 0.041602499 | 3.30 | 0.640 | 0 |
| 1416 | ACER1        | alkaline ceramidase 1                                                                                  | 0.002899879 | 0.041634564 | 0.59 | 0.665 | 0 |
| 1417 | MAGEA6       | melanoma antigen family A, 6                                                                           | 0.002908261 | 0.041696016 | 0.62 | 0.637 | 0 |
| 1418 | ERBB2        | v-erb-b2 erythroblastic leukemia viral oncogene homolog 2, neuro/glioblastoma derived oncogene homolog | 0.002906335 | 0.041696016 | 2.01 | 0.635 | 0 |
| 1419 | C9orf152     | chromosome 9 open reading frame 152                                                                    | 0.002917365 | 0.041797064 | 1.34 | 0.633 | 0 |
| 1420 | JAK3         | Janus kinase 3                                                                                         | 0.002928813 | 0.041902021 | 1.37 | 0.648 | 0 |
| 1421 | ZCCHC17      | zinc finger, CCHC domain containing 17                                                                 | 0.002927265 | 0.041902021 | 0.37 | 0.634 | 0 |
| 1422 | BCL7A        | B-cell CLL/lymphoma 7A                                                                                 | 0.002931023 | 0.041904153 | 1.71 | 0.646 | 0 |
| 1423 | FIBCD1       | fibrinogen C domain containing 1                                                                       | 0.002937669 | 0.041914522 | 0.38 | 0.655 | 0 |
| 1424 | HTATSF1      | HIV-1 Tat specific factor 1                                                                            | 0.002937934 | 0.041914522 | 3.11 | 0.636 | 0 |
| 1425 | SNRK         | SNF related kinase                                                                                     | 0.002934559 | 0.041914522 | 2.32 | 0.627 | 0 |
| 1426 | SLC17A9      | solute carrier family 17, member 9                                                                     | 0.002955244 | 0.042102389 | 1.86 | 0.652 | 0 |
| 1427 | IFITM3       | interferon induced transmembrane protein 3 (1-8U)                                                      | 0.002953263 | 0.042102389 | 1.68 | 0.646 | 0 |
| 1428 | C7orf23      | chromosome 7 open reading frame 23                                                                     | 0.002962581 | 0.042151613 | 0.34 | 0.659 | 0 |
| 1429 | BAGE4        | B melanoma antigen family, member 4                                                                    | 0.002962846 | 0.042151613 | 0.59 | 0.647 | 0 |
| 1430 | AKR1B1       | aldo-keto reductase family 1, member B1 (aldose reductase)                                             | 0.002965535 | 0.04216037  | 0.49 | 0.657 | 0 |
| 1431 | LOC100132207 | cDNA FLJ41345 fis, clone BRAWH2002761.                                                                 | 0.002983356 | 0.042384081 | 0.35 | 0.648 | 0 |
| 1432 | CD14         | CD14 molecule                                                                                          | 0.002985751 | 0.042388496 | 2.86 | 0.637 | 0 |
| 1433 | LOC100130238 | hypothetical LOC100130238                                                                              | 0.00300663  | 0.042655121 | 0.58 | 0.626 | 0 |
| 1434 | SPATA6       | spermatogenesis associated 6                                                                           | 0.0030132   | 0.042718515 | 0.43 | 0.626 | 0 |
| 1435 | KRTAP5-5     | keratin associated protein 5-5                                                                         | 0.0030164   | 0.042734087 | 0.49 | 0.655 | 0 |
| 1436 | ABCG2        | ATP-binding cassette, sub-family G (WHITE), member 2                                                   | 0.003020734 | 0.042735919 | 0.68 | 0.614 | 0 |
| 1437 | OR52M1       | olfactory receptor, family 52, subfamily M, member 1                                                   | 0.003018674 | 0.042735919 | 0.49 | 0.659 | 0 |
| 1438 | VEZT         | vezatin, adherens junctions transmembrane protein                                                      | 0.003023573 | 0.042738657 | 3.17 | 0.636 | 0 |
| 1439 | ZNF2         | zinc finger protein 2                                                                                  | 0.003029002 | 0.042738657 | 0.53 | 0.659 | 0 |
| 1440 | TAS1R3       | Taste receptor type 1 member 3 Precursor                                                               | 0.003031438 | 0.042738657 | 0.59 | 0.638 | 0 |
| 1441 | PPP2R2A      | protein phosphatase 2 (formerly 2A), regulatory subunit B, alpha isoform                               | 0.003028731 | 0.042738657 | 7.99 | 0.661 | 0 |
| 1442 | FBXO9        | F-box protein 9                                                                                        | 0.003030672 | 0.042738657 | 0.28 | 0.637 | 0 |
| 1443 | ZNF326       | zinc finger protein 326                                                                                | 0.003052272 | 0.042943033 | 3.07 | 0.630 | 0 |
| 1444 | CSF1R        | colony stimulating factor 1 receptor                                                                   | 0.003051046 | 0.042943033 | 3.12 | 0.635 | 0 |
| 1445 | SCD          | stearoyl-CoA desaturase (delta-9-desaturase)                                                           | 0.003051198 | 0.042943033 | 0.78 | 0.625 | 0 |
| 1446 | CENPT        | centromere protein T                                                                                   | 0.003057475 | 0.042986493 | 0.63 | 0.646 | 0 |
| 1447 | GPR176       | G protein-coupled receptor 176                                                                         | 0.003064431 | 0.043054509 | 0.53 | 0.667 | 0 |
| 1448 | THAP10       | THAP domain containing 10                                                                              | 0.003069257 | 0.043073756 | 0.66 | 0.631 | 0 |
| 1449 | SPOP         | speckle-type POZ protein                                                                               | 0.003070038 | 0.043073756 | 0.28 | 0.628 | 0 |
| 1450 | TSPAN8       | tetraspanin 8                                                                                          | 0.003083629 | 0.04323461  | 1.45 | 0.659 | 0 |
| 1451 | IGSF6        | immunoglobulin superfamily, member 6                                                                   | 0.003087091 | 0.043253317 | 2.22 | 0.662 | 0 |
| 1452 | TACR2        | tachykinin receptor 2                                                                                  | 0.003092215 | 0.043295268 | 0.33 | 0.616 | 0 |
| 1453 | OLAH         | oleoyl-ACP hydrolase                                                                                   | 0.003094366 | 0.043295572 | 1.44 | 0.643 | 0 |
| 1454 | PATE3        | prostate and testis expressed 3                                                                        | 0.003097871 | 0.043314798 | 0.48 | 0.626 | 0 |
| 1455 | CCR1         | chemokine (C-C motif) receptor 1                                                                       | 0.003119312 | 0.043534081 | 2.88 | 0.649 | 0 |
| 1456 | ABHD4        | abhydrolase domain containing 4                                                                        | 0.003120894 | 0.043534081 | 0.30 | 0.642 | 0 |
| 1457 | LOC153577    | cDNA FLJ30091 fis, clone BNGH41000017                                                                  | 0.003126335 | 0.043534081 | 2.10 | 0.650 | 0 |
| 1458 | ETNK2        | ethanolamine kinase 2                                                                                  | 0.003124998 | 0.043534081 | 1.59 | 0.634 | 0 |

|      |              |                                                                                                         |             |             |      |       |      |
|------|--------------|---------------------------------------------------------------------------------------------------------|-------------|-------------|------|-------|------|
| 1459 | ARHGAP9      | Rho GTPase activating protein 9                                                                         | 0.003126402 | 0.043534081 | 2.55 | 0.636 | 0    |
| 1460 | GCC2         | GRIP and coiled-coil domain containing 2                                                                | 0.003122222 | 0.043534081 | 0.57 | 0.640 | 0    |
| 1461 | DNAJB14      | DnaJ (Hsp40) homolog, subfamily B, member 14                                                            | 0.003128685 | 0.043536047 | 0.46 | 0.657 | 0    |
| 1462 | OSBPL7       | oxysterol binding protein-like 7                                                                        | 0.00314262  | 0.04367017  | 1.52 | 0.657 | 0    |
| 1463 | TRIM34       | tripartite motif-containing 34                                                                          | 0.003140641 | 0.04367017  | 0.51 | 0.641 | 0    |
| 1464 | LOC399715    | cDNA FLJ46311 fis, clone TEST14040197                                                                   | 0.003148636 | 0.043694041 | 1.58 | 0.633 | 0    |
| 1465 | C17orf89     | chromosome 17 open reading frame 89                                                                     | 0.003147738 | 0.043694041 | 4.68 | 0.632 | 0    |
| 1466 | C1orf95      | chromosome 1 open reading frame 95                                                                      | 0.003162899 | 0.043842586 | 1.76 | 0.624 | 0    |
| 1467 | LOC644189    | similar to peroxisomal long-chain acyl-coA thioesterase                                                 | 0.00316581  | 0.043842586 | 0.61 | 0.646 | 0    |
| 1468 | NANOG        | Nanog homeobox                                                                                          | 0.003165368 | 0.043842586 | 0.67 | 0.675 | 0    |
| 1469 | ZNF185       | zinc finger protein 185 (LIM domain)                                                                    | 0.003175674 | 0.04389897  | 0.37 | 0.702 | 0    |
| 1470 | SYPL2        | synaptophysin-like 2                                                                                    | 0.003176359 | 0.04389897  | 1.86 | 0.594 | 0    |
| 1471 | MAD2L2       | MAD2 mitotic arrest deficient-like 2                                                                    | 0.003173755 | 0.04389897  | 4.41 | 0.656 | 0    |
| 1472 | ALAS2        | aminolevulinate, delta-, synthase 2                                                                     | 0.00318381  | 0.043972043 | 1.27 | 0.657 | 0.01 |
| 1473 | PODXL        | podocalyxin-like                                                                                        | 0.003187064 | 0.043987112 | 2.18 | 0.628 | 0    |
| 1474 | HNRNPH2      | heterogeneous nuclear ribonucleoprotein H2                                                              | 0.003197488 | 0.044101034 | 2.60 | 0.625 | 0    |
| 1475 | ZNF324B      | zinc finger protein 324B                                                                                | 0.003200858 | 0.044117584 | 0.27 | 0.650 | 0    |
| 1476 | LOC729770    | hypothetical protein LOC729770                                                                          | 0.003204248 | 0.044134391 | 0.56 | 0.666 | 0    |
| 1477 | APOLD1       | apolipoprotein L domain containing 1                                                                    | 0.003224209 | 0.044359088 | 0.54 | 0.650 | 0    |
| 1478 | ZNF257       | zinc finger protein 257                                                                                 | 0.003224925 | 0.044359088 | 0.41 | 0.649 | 0    |
| 1479 | PPP1R1C      | protein phosphatase 1, regulatory (inhibitor) subunit 1C                                                | 0.003229988 | 0.044398683 | 2.15 | 0.640 | 0    |
| 1480 | ATP8B3       | ATPase, class I, type 8B, member 3                                                                      | 0.00323631  | 0.044455532 | 0.70 | 0.627 | 0    |
| 1481 | GALNT7       | UDP-N-acetyl-alpha-D-galactosamine:polypeptide N-acetylgalactosaminyltransferase 7                      | 0.003238558 | 0.044456374 | 2.38 | 0.653 | 0    |
| 1482 | TAS2R50      | taste receptor, type 2, member 50                                                                       | 0.003243464 | 0.044463671 | 0.64 | 0.658 | 0.01 |
| 1483 | LOC100131043 | cDNA FLJ42228 fis, clone THYMU2041252.                                                                  | 0.003242177 | 0.044463671 | 1.48 | 0.657 | 0    |
| 1484 | MURC         | muscle-related coiled-coil protein                                                                      | 0.003246413 | 0.04447411  | 0.70 | 0.662 | 0    |
| 1485 | RELB         | v-rel reticuloendotheliosis viral oncogene homolog B                                                    | 0.003255352 | 0.044546594 | 1.97 | 0.634 | 0    |
| 1486 | SV2B         | synaptic vesicle glycoprotein 2B                                                                        | 0.003256087 | 0.044546594 | 1.56 | 0.625 | 0    |
| 1487 | POT1         | POT1 protection of telomeres 1 homolog                                                                  | 0.003258827 | 0.0445541   | 0.66 | 0.628 | 0    |
| 1488 | OXER1        | oxoecosanoid (OXE) receptor 1                                                                           | 0.003288111 | 0.044924261 | 2.00 | 0.621 | 0    |
| 1489 | CLCN1        | chloride channel 1, skeletal muscle                                                                     | 0.003292601 | 0.044955385 | 0.52 | 0.632 | 0    |
| 1490 | BRSK2        | BR serine/threonine kinase 2                                                                            | 0.003311756 | 0.04518658  | 0.47 | 0.661 | 0    |
| 1491 | PRDM2        | PR domain containing 2, with ZNF domain                                                                 | 0.003319819 | 0.045243999 | 3.01 | 0.651 | 0    |
| 1492 | KRTAP4-2     | keratin associated protein 4-2                                                                          | 0.003320415 | 0.045243999 | 0.51 | 0.650 | 0    |
| 1493 | SLC1A1       | solute carrier family 1 (neuronal/epithelial high affinity glutamate transporter, system Xag), member 1 | 0.003323347 | 0.045253615 | 1.63 | 0.603 | 0    |
| 1494 | TBC1D16      | TBC1 domain family, member 16                                                                           | 0.003337403 | 0.04541459  | 2.08 | 0.662 | 0    |
| 1495 | C3orf39      | chromosome 3 open reading frame 39                                                                      | 0.003345094 | 0.045428034 | 0.34 | 0.643 | 0    |
| 1496 | PRELID1      | PRELI domain containing 1                                                                               | 0.003342902 | 0.045428034 | 0.26 | 0.644 | 0    |
| 1497 | FAM81B       | family with sequence similarity 81, member B                                                            | 0.003344567 | 0.045428034 | 1.52 | 0.624 | 0    |
| 1498 | LOC100129292 | cDNA FLJ46168 fis, clone TEST14003279.                                                                  | 0.003349729 | 0.045460609 | 0.54 | 0.651 | 0    |
| 1499 | LOC92659     | hypothetical LOC92659                                                                                   | 0.003358796 | 0.04549256  | 0.44 | 0.657 | 0    |
| 1500 | DPYSL3       | dihydropyrimidinase-like 3                                                                              | 0.003354718 | 0.04549256  | 1.46 | 0.661 | 0    |
| 1501 | PAX4         | paired box 4                                                                                            | 0.003357624 | 0.04549256  | 0.38 | 0.653 | 0    |
| 1502 | FLJ11235     | hypothetical FLJ11235                                                                                   | 0.003363595 | 0.045527219 | 0.72 | 0.634 | 0    |
| 1503 | HLA-A        | major histocompatibility complex, class I, A                                                            | 0.003368562 | 0.045564111 | 0.22 | 0.646 | 0    |
| 1504 | ZNF706       | zinc finger protein 706                                                                                 | 0.003382752 | 0.045636766 | 1.32 | 0.625 | 0.01 |
| 1505 | PGM1         | phosphoglucomutase 1                                                                                    | 0.003376962 | 0.045636766 | 0.33 | 0.644 | 0    |
| 1506 | B3GNT9       | UDP-GlcNAc:betaGal beta-1,3-N-acetylglucosaminyltransferase 9                                           | 0.003382912 | 0.045636766 | 1.66 | 0.649 | 0    |
| 1507 | ATP7A        | ATPase, Cu++ transporting, alpha polypeptide                                                            | 0.003379505 | 0.045636766 | 0.61 | 0.652 | 0    |
| 1508 | FLJ40434     | hypothetical FLJ40434                                                                                   | 0.003385509 | 0.045641514 | 0.49 | 0.651 | 0    |
| 1509 | FAM138A      | family with sequence similarity 138, member A                                                           | 0.00338828  | 0.045648599 | 0.44 | 0.660 | 0    |
| 1510 | PDLIM4       | PDZ and LIM domain 4                                                                                    | 0.003393891 | 0.04566367  | 1.89 | 0.607 | 0    |
| 1511 | LCN9         | lipocalin 9                                                                                             | 0.003392935 | 0.04566367  | 0.43 | 0.671 | 0    |
| 1512 | RNF166       | ring finger protein 166                                                                                 | 0.003397823 | 0.045686338 | 0.43 | 0.650 | 0    |
| 1513 | BBS2         | Bardet-Biedl syndrome 2                                                                                 | 0.003402441 | 0.045718191 | 0.28 | 0.639 | 0    |
| 1514 | HPRT1        | hypoxanthine phosphoribosyltransferase 1                                                                | 0.003410594 | 0.04579747  | 5.14 | 0.633 | 0    |
| 1515 | MYCNOS       | v-myc myelocytomatosis viral related oncogene, neuroblastoma derived (avian) opposite strand            | 0.003433549 | 0.04595946  | 0.63 | 0.620 | 0    |
| 1516 | LOC100128276 | hypothetical LOC100128276                                                                               | 0.003432056 | 0.04595946  | 1.71 | 0.630 | 0    |
| 1517 | ASNS         | asparagine synthetase                                                                                   | 0.003433433 | 0.04595946  | 1.96 | 0.640 | 0    |
| 1518 | ZNF248       | zinc finger protein 248                                                                                 | 0.003425669 | 0.04595946  | 0.49 | 0.634 | 0    |
| 1519 | GLUD1        | glutamate dehydrogenase 1                                                                               | 0.003433961 | 0.04595946  | 0.36 | 0.639 | 0    |

|      |           |                                                         |             |             |      |       |      |
|------|-----------|---------------------------------------------------------|-------------|-------------|------|-------|------|
| 1520 | GNRH1     | gonadotropin-releasing hormone 1                        | 0.003444669 | 0.046072452 | 1.88 | 0.659 | 0    |
| 1521 | QRS11     | glutaminyl-tRNA synthase (glutamine-hydrolyzing)-like 1 | 0.003451913 | 0.046129274 | 1.94 | 0.665 | 0    |
| 1522 | ZNF273    | zinc finger protein 273                                 | 0.003453456 | 0.046129274 | 0.49 | 0.644 | 0    |
| 1523 | TSPAN10   | tetraspanin 10                                          | 0.003457828 | 0.046157348 | 0.44 | 0.641 | 0    |
| 1524 | MRC2      | mannose receptor, C type 2                              | 0.003480702 | 0.046432205 | 1.76 | 0.645 | 0    |
| 1525 | RNU12     | RNA, U12 small nuclear                                  | 0.003486984 | 0.046455041 | 0.58 | 0.631 | 0    |
| 1526 | HSF1      | heat shock transcription factor 1                       | 0.003486825 | 0.046455041 | 0.39 | 0.637 | 0    |
| 1527 | HTR1B     | 5-hydroxytryptamine (serotonin) receptor 1B             | 0.003500955 | 0.046610614 | 0.59 | 0.688 | 0    |
| 1528 | SBDS      | Shwachman-Bodian-Diamond syndrome                       | 0.003510682 | 0.046709537 | 0.52 | 0.633 | 0    |
| 1529 | ACSF2     | acyl-CoA synthetase family member 2                     | 0.003515491 | 0.046742921 | 0.49 | 0.638 | 0    |
| 1530 | PSD4      | pleckstrin and Sec7 domain containing 4                 | 0.003524261 | 0.046828901 | 0.66 | 0.622 | 0    |
| 1531 | FYB       | FYN binding protein                                     | 0.003530457 | 0.046849997 | 1.80 | 0.638 | 0    |
| 1532 | E2F6      | E2F transcription factor 6                              | 0.003530216 | 0.046849997 | 4.19 | 0.635 | 0    |
| 1533 | PRINS     | psoriasis associated RNA induced by stress              | 0.003548294 | 0.047055983 | 2.57 | 0.617 | 0    |
| 1534 | SPINK7    | serine peptidase inhibitor, Kazal type 7                | 0.003555991 | 0.047127317 | 0.39 | 0.665 | 0    |
| 1535 | OR2AG2    | olfactory receptor, family 2, subfamily AG, member 2    | 0.003558672 | 0.047132124 | 0.62 | 0.657 | 0    |
| 1536 | EPDR1     | ependymin related protein 1                             | 0.003561151 | 0.047134249 | 1.63 | 0.664 | 0    |
| 1537 | POLQ      | polymerase (DNA directed), theta                        | 0.003566951 | 0.04718029  | 1.81 | 0.668 | 0    |
| 1538 | MAK       | male germ cell-associated kinase                        | 0.003589899 | 0.047429929 | 1.72 | 0.647 | 0    |
| 1539 | SLFN13    | schlafen family member 13                               | 0.00359049  | 0.047429929 | 1.43 | 0.632 | 0    |
| 1540 | PBXIP1    | pre-B-cell leukemia homeobox interacting protein 1      | 0.003608181 | 0.04763267  | 0.47 | 0.651 | 0    |
| 1541 | CTSK      | cathepsin K                                             | 0.003612282 | 0.047655872 | 1.43 | 0.610 | 0    |
| 1542 | RAB5A     | RAB5A, member RAS oncogene family                       | 0.003616627 | 0.047682243 | 3.44 | 0.639 | 0    |
| 1543 | KRTAP4-12 | keratin associated protein 4-12                         | 0.003620221 | 0.047698697 | 0.57 | 0.660 | 0    |
| 1544 | TTC1      | tetratricopeptide repeat domain 1                       | 0.003634576 | 0.047856814 | 0.35 | 0.640 | 0    |
| 1545 | C1orf93   | chromosome 1 open reading frame 93                      | 0.003638634 | 0.047879246 | 1.99 | 0.631 | 0    |
| 1546 | MEGF6     | multiple EGF-like-domains 6                             | 0.003651254 | 0.047966597 | 1.51 | 0.670 | 0    |
| 1547 | CA4       | carbonic anhydrase IV                                   | 0.003652351 | 0.047966597 | 1.49 | 0.634 | 0    |
| 1548 | ZNF430    | zinc finger protein 430                                 | 0.003651783 | 0.047966597 | 0.52 | 0.650 | 0    |
| 1549 | TBC1D9    | TBC1 domain family, member 9 (with GRAM domain)         | 0.003657695 | 0.048005773 | 0.40 | 0.644 | 0    |
| 1550 | ZNF583    | zinc finger protein 583                                 | 0.003671035 | 0.048149767 | 0.36 | 0.633 | 0    |
| 1551 | BACE1     | beta-site APP-cleaving enzyme 1                         | 0.003676002 | 0.048183836 | 0.59 | 0.614 | 0    |
| 1552 | TTYH1     | tweety homolog 1                                        | 0.003679278 | 0.048195698 | 0.61 | 0.639 | 0    |
| 1553 | TARS2     | threonyl-tRNA synthetase 2, mitochondrial               | 0.003686481 | 0.048258953 | 0.31 | 0.643 | 0    |
| 1554 | PNPLA2    | patatin-like phospholipase domain containing 2          | 0.003706409 | 0.048488602 | 0.54 | 0.621 | 0    |
| 1555 | FAM21C    | family with sequence similarity 21, member C            | 0.003718072 | 0.048609912 | 0.60 | 0.626 | 0    |
| 1556 | NEK11     | NIMA                                                    | 0.003733912 | 0.048785618 | 0.46 | 0.627 | 0    |
| 1557 | SIGLEC8   | sialic acid binding Ig-like lectin 8                    | 0.003747401 | 0.048853379 | 1.64 | 0.606 | 0    |
| 1558 | CRY2      | cryptochrome 2                                          | 0.003748096 | 0.048853379 | 0.26 | 0.631 | 0    |
| 1559 | TRIM5     | tripartite motif-containing 5                           | 0.00374871  | 0.048853379 | 0.42 | 0.648 | 0    |
| 1560 | LRRC33    | leucine rich repeat containing 33                       | 0.003744438 | 0.048853379 | 1.71 | 0.651 | 0    |
| 1561 | LOC642587 | NPC-A-5                                                 | 0.003752786 | 0.048875163 | 1.73 | 0.652 | 0    |
| 1562 | ZNF709    | zinc finger protein 709                                 | 0.003756889 | 0.048897285 | 0.38 | 0.657 | 0    |
| 1563 | SULF1     | sulfatase 1                                             | 0.00376885  | 0.048991304 | 6.57 | 0.593 | 0    |
| 1564 | S100A8    | S100 calcium binding protein A8                         | 0.003768933 | 0.048991304 | 1.99 | 0.621 | 0    |
| 1565 | PPID      | peptidylprolyl isomerase D                              | 0.00377282  | 0.049010496 | 2.32 | 0.650 | 0    |
| 1566 | RNF208    | ring finger protein 208                                 | 0.003791424 | 0.049189306 | 0.46 | 0.676 | 0    |
| 1567 | UTP3      | UTP3, small subunit (SSU) processome component, homolog | 0.00379022  | 0.049189306 | 4.82 | 0.635 | 0    |
| 1568 | ZHX3      | zinc fingers and homeoboxes 3                           | 0.003794561 | 0.049198613 | 0.37 | 0.630 | 0    |
| 1569 | ASB18     | ankyrin repeat and SOCS box-containing 18               | 0.003808053 | 0.049303187 | 0.61 | 0.640 | 0    |
| 1570 | ZNF138    | zinc finger protein 138                                 | 0.003809645 | 0.049303187 | 0.63 | 0.624 | 0    |
| 1571 | ZNF625    | zinc finger protein 625                                 | 0.003809902 | 0.049303187 | 0.50 | 0.643 | 0    |
| 1572 | WDFY3     | WD repeat and FYVE domain containing 3                  | 0.00381588  | 0.049349134 | 2.44 | 0.647 | 0    |
| 1573 | LOC283050 | hypothetical LOC283050                                  | 0.003833121 | 0.049509118 | 1.41 | 0.652 | 0    |
| 1574 | CXorf26   | chromosome X open reading frame 26                      | 0.003830995 | 0.049509118 | 0.54 | 0.643 | 0    |
| 1575 | VSNL1     | visinin-like 1                                          | 0.003847134 | 0.049600738 | 1.29 | 0.641 | 0.03 |
| 1576 | ZNF688    | zinc finger protein 688                                 | 0.003847397 | 0.049600738 | 0.16 | 0.632 | 0    |
| 1577 | DCLRE1A   | DNA cross-link repair 1A                                | 0.003849974 | 0.049600738 | 2.45 | 0.644 | 0    |
| 1578 | PRKCA     | protein kinase C, alpha                                 | 0.003847804 | 0.049600738 | 2.04 | 0.644 | 0    |
| 1579 | UNC119B   | unc-119 homolog B                                       | 0.003854622 | 0.04962917  | 2.75 | 0.657 | 0    |
| 1580 | EIF2C1    | eukaryotic translation initiation factor 2C, 1          | 0.003861461 | 0.049685755 | 0.44 | 0.650 | 0    |

|      |       |                                         |             |             |      |       |   |
|------|-------|-----------------------------------------|-------------|-------------|------|-------|---|
| 1581 | PECR  | peroxisomal trans-2-enoyl-CoA reductase | 0.003866247 | 0.049711376 | 0.53 | 0.667 | 0 |
| 1582 | ADNP2 | ADNP homeobox 2                         | 0.003868342 | 0.049711376 | 0.49 | 0.612 | 0 |

\*Hazard Ratio (HR), p-value, FDR and C-indices computed for association with mortality in the Freiburg cohort. For each gene the relative frequency of inclusion into the signature (the resampling inclusion frequency (Freq) from 100 resampling data sets) was recorded.

**Table E5. 9- Gene Signature picked by Componentwise Boosting**

| <b>Table E5. 9- Gene Signature developed by Componentwise Boosting</b> |                                     |                    |             |                    |
|------------------------------------------------------------------------|-------------------------------------|--------------------|-------------|--------------------|
| <b>Gene Symbol</b>                                                     | <b>Gene Name</b>                    | <b>Beta-value*</b> | <b>FDR</b>  | <b>Frequency**</b> |
| BMP6                                                                   | Bone morphogenetic protein 6        | 0.185910087        | 9.54573E-06 | 0.54               |
| IBSP                                                                   | Integrin-binding sialoprotein       | 0.106645031        | 4.17289E-05 | 0.54               |
| S100A14                                                                | S100 calcium binding protein A14    | 0.132209853        | 9.54573E-06 | 0.47               |
| STAB1                                                                  | Stabilin 1                          | 0.173815731        | 1.58025E-05 | 0.37               |
| LOC284751                                                              | cDNA FLJ33286 fis                   | 0.087142377        | 3.3665E-05  | 0.34               |
| ANKRD22                                                                | Ankyrin repeat domain 22            | 0.035989823        | 0.000133129 | 0.22               |
| SEPT4                                                                  | Septin 4                            | -0.09270581        | 0.000987911 | 0.18               |
| SLC16A1                                                                | Solute carrier family 16, member 1  | 0.101123344        | 0.000864992 | 0.08               |
| FAM198B                                                                | Family with sequence similarity 198 | 0.029617883        | 4.56104E-05 | 0.03               |

\*Estimated multivariable regression parameters (Beta-value), i.e., conditional log-hazard ratios, from componentwise boosting and univariate FDR computed for association with mortality in the Freiburg cohort. \*\*For each gene the relative frequency of inclusion into the signature (the resampling inclusion frequency (Freq) from 100 resampling data sets) was recorded.

**Table E6. C-Indices and confidence intervals for the survival models**

| <b>Table E6. C-Indices and confidence intervals for the survival models</b> |                 |             |              |
|-----------------------------------------------------------------------------|-----------------|-------------|--------------|
|                                                                             | <b>c-index*</b> | <b>2.5%</b> | <b>97.5%</b> |
| <b>Freiburg Signature + GAP</b>                                             | 0.755           | 0.709       | 0.813        |
| <b>Freiburg Signature</b>                                                   | 0.733           | 0.688       | 0.772        |
| <b>Freiburg GAP</b>                                                         | 0.602           | 0.526       | 0.686        |
| <b>Leuven Signature + GAP</b>                                               | 0.779           | 0.658       | 0.879        |
| <b>Leuven Signature</b>                                                     | 0.656           | 0.546       | 0.762        |
| <b>Leuven GAP</b>                                                           | 0.709           | 0.606       | 0.801        |
| <b>Siena Signature + GAP</b>                                                | 0.713           | 0.643       | 0.811        |
| <b>Siena Signature</b>                                                      | 0.634           | 0.542       | 0.724        |
| <b>Siena GAP</b>                                                            | 0.639           | 0.559       | 0.747        |

\* C-indices and 95% confidence interval for models that predict patient survival either using the GAP index only, the grouping of patients based on the inferred gene expression signature or a combination of both. The gene expression signature was inferred using all expressed genes.

**Table E7. 6- Gene Signature picked by Componentwise Boosting**

| <b>Table E7. 6- Gene Signature developed by Componentwise Boosting</b> |                                       |             |                    |
|------------------------------------------------------------------------|---------------------------------------|-------------|--------------------|
| <b>Gene Symbol</b>                                                     | <b>Gene Name</b>                      | <b>FDR*</b> | <b>Frequency**</b> |
| BMP6                                                                   | Bone morphogenetic protein 6          | 9.54573E-06 | 0.54               |
| IBSP                                                                   | Integrin-binding sialoprotein         | 4.17289E-05 | 0.54               |
| S100A14                                                                | S100 calcium binding protein A14      | 9.54573E-06 | 0.47               |
| STAB1                                                                  | Stabilin 1                            | 1.58025E-05 | 0.37               |
| LOC284751                                                              | cDNA FLJ33286 fis, clone ASTRO2014174 | 3.3665E-05  | 0.34               |
| ANKRD22                                                                | Ankyrin repeat domain 22              | 0.000133129 | 0.22               |

\*Univariate FDR computed for association with mortality in the Freiburg cohort. \*\*For each gene the relative frequency of inclusion into the signature (the resampling inclusion frequency (Freq) from 100 resampling data sets) was recorded.

**Table E8. Ingenuity Network Analysis of the BAL Signature related to Mortality**

| Top Networks |                                                                                                             |       |
|--------------|-------------------------------------------------------------------------------------------------------------|-------|
| ID           | Associated Network Functions                                                                                | Score |
| 1            | Cancer, Organismal Injury and Abnormalities, Reproductive System Disease                                    | 41    |
| 2            | Dermatological Diseases and Conditions, Hereditary Disorder, Cell-To-Cell Signaling and Interaction         | 37    |
| 3            | Cell Cycle, Cancer, Organismal Injury and Abnormalities                                                     | 35    |
| 4            | Cellular Movement, Cancer, Organismal Injury and Abnormalities                                              | 35    |
| 5            | Carbohydrate Metabolism, Small Molecule Biochemistry, Skeletal and Muscular System Development and Function | 33    |



**Table E9. The Airway Basal Cell (ABC) Signature**

| <b>Table E9. List of ABC Genes and Association with Mortality in IPF</b> |               |                                                                                             |                |             |
|--------------------------------------------------------------------------|---------------|---------------------------------------------------------------------------------------------|----------------|-------------|
|                                                                          | <b>Symbol</b> | <b>Gene Name</b>                                                                            | <b>p-value</b> | <b>FDR*</b> |
| 1                                                                        | S100A14       | S100 calcium binding protein A14                                                            | 9.39E-10       | 8.65E-07    |
| 2                                                                        | GALNT14       | UDP-N-acetyl-alpha-D-galactosamine:polypeptide N-acetylgalactosaminyltransferase 14         | 3.77E-08       | 1.74E-05    |
| 3                                                                        | ADM           | adrenomedullin                                                                              | 6.22E-08       | 1.91E-05    |
| 4                                                                        | NRG1          | neuregulin 1                                                                                | 1.72E-07       | 3.95E-05    |
| 5                                                                        | CYR61         | cysteine-rich, angiogenic inducer, 61                                                       | 2.30E-07       | 4.24E-05    |
| 6                                                                        | RAB3D         | RAB3D, member RAS oncogene family                                                           | 3.14E-07       | 4.33E-05    |
| 7                                                                        | CCNJL         | cyclin J-like                                                                               | 3.71E-07       | 4.33E-05    |
| 8                                                                        | SFN           | stratifin                                                                                   | 3.76E-07       | 4.33E-05    |
| 9                                                                        | PLEKHG2       | pleckstrin homology domain containing, family G (with RhoGef domain) member 2               | 1.33E-06       | 0.00014     |
| 10                                                                       | SCEL          | sciellin                                                                                    | 1.72E-06       | 0.00016     |
| 11                                                                       | IER3          | immediate early response 3                                                                  | 2.21E-06       | 0.00018     |
| 12                                                                       | FAM110C       | family with sequence similarity 110, member C                                               | 2.35E-06       | 0.00018     |
| 13                                                                       | GJA1          | gap junction protein, alpha 1, 43kDa                                                        | 3.61E-06       | 0.00026     |
| 14                                                                       | TRIM47        | tripartite motif containing 47                                                              | 4.24E-06       | 0.00028     |
| 15                                                                       | FJX1          | four jointed box 1 (Drosophila)                                                             | 6.35E-06       | 0.00037     |
| 16                                                                       | ANXA3         | annexin A3                                                                                  | 6.44E-06       | 0.00037     |
| 17                                                                       | HIF1A         | hypoxia inducible factor 1, alpha subunit (basic helix-loop-helix transcription factor)     | 7.10E-06       | 0.00038     |
| 18                                                                       | HOMER3        | homer homolog 3 (Drosophila)                                                                | 7.80E-06       | 0.00040     |
| 19                                                                       | SLC16A1       | solute carrier family 16, member 1 (monocarboxylic acid transporter 1)                      | 8.50E-06       | 0.00041     |
| 20                                                                       | MEX3A         | mex-3 homolog A (C. elegans)                                                                | 8.83E-06       | 0.00041     |
| 21                                                                       | C9orf89       | chromosome 9 open reading frame 89                                                          | 9.35E-06       | 0.00041     |
| 22                                                                       | UCK2          | uridine-cytidine kinase 2                                                                   | 1.05E-05       | 0.00042     |
| 23                                                                       | NIPAL4        | NIPA-like domain containing 4                                                               | 1.06E-05       | 0.00042     |
| 24                                                                       | FBLIM1        | filamin binding LIM protein 1                                                               | 1.10E-05       | 0.00042     |
| 25                                                                       | MYC           | v-myc myelocytomatosis viral oncogene homolog (avian)                                       | 1.59E-05       | 0.00059     |
| 26                                                                       | SLC7A11       | solute carrier family 7 (anionic amino acid transporter light chain, xc- system), member 11 | 2.37E-05       | 0.00080     |
| 27                                                                       | MPP6          | membrane protein, palmitoylated 6 (MAGUK p55 subfamily member 6)                            | 2.40E-05       | 0.00080     |
| 28                                                                       | ANGPTL4       | angiopoietin-like 4                                                                         | 2.43E-05       | 0.00080     |
| 29                                                                       | DBN1          | drebrin 1                                                                                   | 3.30E-05       | 0.00105     |
| 30                                                                       | SLC7A1        | solute carrier family 7 (cationic amino acid transporter, y+ system), member 1              | 4.81E-05       | 0.00148     |
| 31                                                                       | ECM1          | extracellular matrix protein 1                                                              | 5.30E-05       | 0.00158     |
| 32                                                                       | LAMA3         | laminin, alpha 3                                                                            | 6.31E-05       | 0.00182     |
| 33                                                                       | SHC2          | SHC (Src homology 2 domain containing) transforming protein 2                               | 6.53E-05       | 0.00182     |
| 34                                                                       | TUBB3         | tubulin, beta 3 class III                                                                   | 7.53E-05       | 0.00204     |
| 35                                                                       | FERMT1        | fermitin family member 1                                                                    | 8.50E-05       | 0.00224     |
| 36                                                                       | MT1X          | metallothionein 1X                                                                          | 0.00010        | 0.00256     |
| 37                                                                       | TRIM7         | tripartite motif containing 7                                                               | 0.00010        | 0.00256     |
| 38                                                                       | OAF           | OAF homolog (Drosophila)                                                                    | 0.00011        | 0.00256     |
| 39                                                                       | HTR7          | 5-hydroxytryptamine (serotonin) receptor 7 (adenylate cyclase-coupled)                      | 0.00012        | 0.00273     |
| 40                                                                       | KRT6A         | keratin 6A                                                                                  | 0.00012        | 0.00273     |
| 41                                                                       | TMEM132A      | transmembrane protein 132A                                                                  | 0.00013        | 0.00287     |
| 42                                                                       | TNFRSF10D     | tumor necrosis factor receptor superfamily, member 10d, decoy with truncated death domain   | 0.00016        | 0.00344     |
| 43                                                                       | SNRPA1        | small nuclear ribonucleoprotein polypeptide A'                                              | 0.00017        | 0.00357     |
| 44                                                                       | FAM129B       | family with sequence similarity 129, member B                                               | 0.00017        | 0.00357     |
| 45                                                                       | ZNF703        | zinc finger protein 703                                                                     | 0.00018        | 0.00357     |
| 46                                                                       | MT1H          | metallothionein 1H                                                                          | 0.00018        | 0.00357     |
| 47                                                                       | LARP1B        | La ribonucleoprotein domain family, member 1B                                               | 0.00019        | 0.00357     |
| 48                                                                       | GRB10         | growth factor receptor-bound protein 10                                                     | 0.00019        | 0.00357     |
| 49                                                                       | ARAP3         | ArfGAP with RhoGAP domain, ankyrin repeat and PH domain 3                                   | 0.00019        | 0.00357     |
| 50                                                                       | COL18A1       | collagen, type XVIII, alpha 1                                                               | 0.00020        | 0.00361     |
| 51                                                                       | MEX3C         | mex-3 homolog C (C. elegans)                                                                | 0.00022        | 0.00393     |
| 52                                                                       | JUB           | jub, ajuba homolog (Xenopus laevis)                                                         | 0.00022        | 0.00393     |
| 53                                                                       | ECE1          | endothelin converting enzyme 1                                                              | 0.00026        | 0.00460     |
| 54                                                                       | ITGA3         | integrin, alpha 3 (antigen CD49C, alpha 3 subunit of VLA-3 receptor)                        | 0.00036        | 0.00606     |
| 55                                                                       | SLC16A4       | solute carrier family 16, member 4 (monocarboxylic acid transporter 5)                      | 0.00039        | 0.00636     |

|     |              |                                                                                                      |         |         |
|-----|--------------|------------------------------------------------------------------------------------------------------|---------|---------|
| 56  | YRDC         | yrnC domain containing (E. coli)                                                                     | 0.00040 | 0.00636 |
| 57  | KRT83        | keratin 83                                                                                           | 0.00041 | 0.00636 |
| 58  | P2RY2        | purinergic receptor P2Y, G-protein coupled, 2                                                        | 0.00041 | 0.00636 |
| 59  | TNFRSF12A    | tumor necrosis factor receptor superfamily, member 12A                                               | 0.00041 | 0.00636 |
| 60  | IRX1         | iroquois homeobox 1                                                                                  | 0.00041 | 0.00636 |
| 61  | ZNF354C      | zinc finger protein 354C                                                                             | 0.00042 | 0.00637 |
| 62  | LRRRC8A      | leucine rich repeat containing 8 family, member A                                                    | 0.00044 | 0.00659 |
| 63  | CARD10       | caspase recruitment domain family, member 10                                                         | 0.00046 | 0.00666 |
| 64  | SNHG3        | small nucleolar RNA host gene 3 (non-protein coding)                                                 | 0.00049 | 0.00699 |
| 65  | FSTL3        | folliculin-like 3 (secreted glycoprotein)                                                            | 0.00050 | 0.00707 |
| 66  | EHD2         | EH-domain containing 2                                                                               | 0.00053 | 0.00739 |
| 67  | KLK6         | kallikrein-related peptidase 6                                                                       | 0.00056 | 0.00776 |
| 68  | MARCKSL1     | MARCKS-like 1                                                                                        | 0.00058 | 0.00792 |
| 69  | LOC100129387 | uncharacterized LOC100129387                                                                         | 0.00062 | 0.00826 |
| 70  | MYL9         | myosin, light chain 9, regulatory                                                                    | 0.00065 | 0.00852 |
| 71  | ABLIM3       | actin binding LIM protein family, member 3                                                           | 0.00069 | 0.00882 |
| 72  | ARNTL2       | aryl hydrocarbon receptor nuclear translocator-like 2                                                | 0.00069 | 0.00882 |
| 73  | CLIC3        | chloride intracellular channel 3                                                                     | 0.00073 | 0.00908 |
| 74  | AHNAK2       | AHNAK nucleoprotein 2                                                                                | 0.00073 | 0.00908 |
| 75  | PHLDA2       | pleckstrin homology-like domain, family A, member 2                                                  | 0.00077 | 0.00935 |
| 76  | MT1E         | metallothionein 1E                                                                                   | 0.00078 | 0.00935 |
| 77  | BMP2         | bone morphogenetic protein 2                                                                         | 0.00078 | 0.00935 |
| 78  | KRT14        | keratin 14                                                                                           | 0.00081 | 0.00942 |
| 79  | GAS6         | growth arrest-specific 6                                                                             | 0.00081 | 0.00942 |
| 80  | SLC6A8       | solute carrier family 6 (neurotransmitter transporter, creatine), member 8                           | 0.00083 | 0.00948 |
| 81  | PAICS        | phosphoribosylaminoimidazole carboxylase, phosphoribosylaminoimidazole succinocarboxamide synthetase | 0.00083 | 0.00948 |
| 82  | TIMP3        | TIMP metalloproteinase inhibitor 3                                                                   | 0.00085 | 0.00952 |
| 83  | NPR2         | natriuretic peptide receptor B/guanylate cyclase B (atrionatriuretic peptide receptor B)             | 0.00086 | 0.00952 |
| 84  | MT1B         | metallothionein 1B                                                                                   | 0.00091 | 0.00993 |
| 85  | FGFBP1       | fibroblast growth factor binding protein 1                                                           | 0.00093 | 0.01013 |
| 86  | FOSL1        | FOS-like antigen 1                                                                                   | 0.00098 | 0.01044 |
| 87  | CHCHD6       | coiled-coil-helix-coiled-coil-helix domain containing 6                                              | 0.00102 | 0.01068 |
| 88  | FSCN1        | fascin homolog 1, actin-bundling protein (Strongylocentrotus purpuratus)                             | 0.00102 | 0.01068 |
| 89  | LOC338620    | uncharacterized protein LOC338620                                                                    | 0.00103 | 0.01071 |
| 90  | RIMS3        | regulating synaptic membrane exocytosis 3                                                            | 0.00115 | 0.01170 |
| 91  | C22orf36     | chromosome 22 open reading frame 36                                                                  | 0.00116 | 0.01170 |
| 92  | KCNS3        | potassium voltage-gated channel, delayed-rectifier, subfamily S, member 3                            | 0.00117 | 0.01170 |
| 93  | LHFP         | lipoma HMGIC fusion partner                                                                          | 0.00118 | 0.01173 |
| 94  | NT5DC2       | 5'-nucleotidase domain containing 2                                                                  | 0.00128 | 0.01254 |
| 95  | AREG         | amphiregulin                                                                                         | 0.00130 | 0.01258 |
| 96  | CAV2         | caveolin 2                                                                                           | 0.00131 | 0.01258 |
| 97  | PTGS2        | prostaglandin-endoperoxide synthase 2 (prostaglandin G/H synthase and cyclooxygenase)                | 0.00133 | 0.01261 |
| 98  | SMOX         | spermine oxidase                                                                                     | 0.00150 | 0.01400 |
| 99  | KLHL21       | kelch-like 21 (Drosophila)                                                                           | 0.00150 | 0.01400 |
| 100 | ADARB1       | adenosine deaminase, RNA-specific, B1                                                                | 0.00156 | 0.01437 |
| 101 | HOPX         | HOP homeobox                                                                                         | 0.00158 | 0.01437 |
| 102 | SYT7         | synaptotagmin VII                                                                                    | 0.00165 | 0.01488 |
| 103 | FBXO32       | F-box protein 32                                                                                     | 0.00167 | 0.01492 |
| 104 | SLC35F2      | solute carrier family 35, member F2                                                                  | 0.00178 | 0.01577 |
| 105 | OSGIN1       | oxidative stress induced growth inhibitor 1                                                          | 0.00184 | 0.01616 |
| 106 | DNAJB5       | DnaJ (Hsp40) homolog, subfamily B, member 5                                                          | 0.00199 | 0.01716 |
| 107 | DSG2         | desmoglein 2                                                                                         | 0.00199 | 0.01716 |
| 108 | SRPX2        | sushi-repeat containing protein, X-linked 2                                                          | 0.00207 | 0.01767 |
| 109 | DOK4         | docking protein 4                                                                                    | 0.00216 | 0.01829 |
| 110 | SEMA3B       | sema domain, immunoglobulin domain (Ig), short basic domain, secreted, (semaphorin) 3B               | 0.00219 | 0.01831 |
| 111 | RGS20        | regulator of G-protein signaling 20                                                                  | 0.00221 | 0.01831 |
| 112 | C10orf47     | chromosome 10 open reading frame 47                                                                  | 0.00225 | 0.01849 |
| 113 | SLC39A14     | solute carrier family 39 (zinc transporter), member 14                                               | 0.00231 | 0.01886 |
| 114 | TSHZ3        | teashirt zinc finger homeobox 3                                                                      | 0.00243 | 0.01967 |
| 115 | TPD52L1      | tumor protein D52-like 1                                                                             | 0.00270 | 0.02160 |
| 116 | MT1L         | metallothionein 1L (gene/pseudogene)                                                                 | 0.00274 | 0.02174 |

|     |          |                                                                                  |         |         |
|-----|----------|----------------------------------------------------------------------------------|---------|---------|
| 117 | DUSP5    | dual specificity phosphatase 5                                                   | 0.00280 | 0.02201 |
| 118 | VEZT     | vezatin, adherens junctions transmembrane protein                                | 0.00302 | 0.02344 |
| 119 | PPP2R2A  | protein phosphatase 2, regulatory subunit B, alpha                               | 0.00303 | 0.02344 |
| 120 | ETNK2    | ethanolamine kinase 2                                                            | 0.00312 | 0.02398 |
| 121 | ASNS     | asparagine synthetase (glutamine-hydrolyzing)                                    | 0.00343 | 0.02613 |
| 122 | MRC2     | mannose receptor, C type 2                                                       | 0.00348 | 0.02628 |
| 123 | VSNL1    | visinin-like 1                                                                   | 0.00385 | 0.02881 |
| 124 | DVL1     | dishevelled, dsh homolog 1 (Drosophila)                                          | 0.00390 | 0.02895 |
| 125 | C14orf34 | chromosome 14 open reading frame 34                                              | 0.00402 | 0.02963 |
| 126 | SLC7A5   | solute carrier family 7 (amino acid transporter light chain, L system), member 5 | 0.00409 | 0.02988 |
| 127 | PLSCR3   | phospholipid scramblase 3                                                        | 0.00428 | 0.03101 |
| 128 | ARHGEF5  | Rho guanine nucleotide exchange factor (GEF) 5                                   | 0.00439 | 0.03160 |
| 129 | PDCD5    | programmed cell death 5                                                          | 0.00447 | 0.03179 |
| 130 | PHLDA1   | pleckstrin homology-like domain, family A, member 1                              | 0.00449 | 0.03179 |
| 131 | IPO9     | importin 9                                                                       | 0.00456 | 0.03183 |
| 132 | PGAM1    | phosphoglycerate mutase 1 (brain)                                                | 0.00456 | 0.03183 |
| 133 | FAM46B   | family with sequence similarity 46, member B                                     | 0.00463 | 0.03203 |
| 134 | CDH3     | cadherin 3, type 1, P-cadherin (placental)                                       | 0.00470 | 0.03229 |
| 135 | TMEM159  | transmembrane protein 159                                                        | 0.00482 | 0.03289 |
| 136 | MAPK6    | mitogen-activated protein kinase 6                                               | 0.00487 | 0.03297 |
| 137 | SLC39A13 | solute carrier family 39 (zinc transporter), member 13                           | 0.00493 | 0.03317 |
| 138 | PPP1R12B | protein phosphatase 1, regulatory subunit 12B                                    | 0.00500 | 0.03335 |
| 139 | LAMC2    | laminin, gamma 2                                                                 | 0.00514 | 0.03380 |
| 140 | NFYA     | nuclear transcription factor Y, alpha                                            | 0.00514 | 0.03380 |
| 141 | ITGAV    | integrin, alpha V (vitronectin receptor, alpha polypeptide, antigen CD51)        | 0.00525 | 0.03427 |
| 142 | KRT17    | keratin 17                                                                       | 0.00535 | 0.03467 |
| 143 | MICALL1  | MICAL-like 1                                                                     | 0.00541 | 0.03482 |
| 144 | DEAF1    | deformed epidermal autoregulatory factor 1 (Drosophila)                          | 0.00546 | 0.03491 |
| 145 | TEAD4    | TEA domain family member 4                                                       | 0.00575 | 0.03653 |
| 146 | FHDC1    | FH2 domain containing 1                                                          | 0.00580 | 0.03653 |
| 147 | HMGA1    | high mobility group AT-hook 1                                                    | 0.00583 | 0.03653 |
| 148 | SNHG1    | small nucleolar RNA host gene 1 (non-protein coding)                             | 0.00590 | 0.03673 |
| 149 | ITGA6    | integrin, alpha 6                                                                | 0.00620 | 0.03818 |
| 150 | TRIB3    | tribbles homolog 3 (Drosophila)                                                  | 0.00622 | 0.03818 |
| 151 | ZNF281   | zinc finger protein 281                                                          | 0.00631 | 0.03846 |
| 152 | CRABP2   | cellular retinoic acid binding protein 2                                         | 0.00637 | 0.03861 |
| 153 | FAM83G   | family with sequence similarity 83, member G                                     | 0.00654 | 0.03935 |
| 154 | GPRC5A   | G protein-coupled receptor, family C, group 5, member A                          | 0.00662 | 0.03957 |
| 155 | PLXNA1   | plexin A1                                                                        | 0.00685 | 0.04073 |
| 156 | ATP13A2  | ATPase type 13A2                                                                 | 0.00706 | 0.04170 |
| 157 | PSAT1    | phosphoserine aminotransferase 1                                                 | 0.00735 | 0.04311 |
| 158 | GTPBP4   | GTP binding protein 4                                                            | 0.00746 | 0.04323 |
| 159 | FASN     | fatty acid synthase                                                              | 0.00746 | 0.04323 |
| 160 | ELMO3    | engulfment and cell motility 3                                                   | 0.00759 | 0.04370 |
| 161 | C10orf10 | chromosome 10 open reading frame 10                                              | 0.00779 | 0.04452 |
| 162 | TSPAN5   | tetraspanin 5                                                                    | 0.00787 | 0.04452 |
| 163 | STRAP    | serine/threonine kinase receptor associated protein                              | 0.00788 | 0.04452 |
| 164 | MFGE8    | milk fat globule-EGF factor 8 protein                                            | 0.00839 | 0.04710 |
| 165 | ANKRD9   | ankyrin repeat domain 9                                                          | 0.00879 | 0.04908 |
| 166 | EXT1     | exostosin 1                                                                      | 0.00902 | 0.05004 |
| 167 | AKR1B10  | aldo-keto reductase family 1, member B10 (aldose reductase)                      | 0.00907 | 0.05004 |
| 168 | MAFA     | v-maf musculoaponeurotic fibrosarcoma oncogene homolog A (avian)                 | 0.00915 | 0.05018 |
| 169 | KCNQ3    | potassium voltage-gated channel, KQT-like subfamily, member 3                    | 0.00934 | 0.05093 |
| 170 | ZXDB     | zinc finger, X-linked, duplicated B                                              | 0.00940 | 0.05093 |
| 171 | DST      | dystonin                                                                         | 0.00948 | 0.05108 |
| 172 | LY6D     | lymphocyte antigen 6 complex, locus D                                            | 0.00958 | 0.05130 |
| 173 | AKAP2    | A kinase (PRKA) anchor protein 2                                                 | 0.00965 | 0.05139 |
| 174 | XDH      | xanthine dehydrogenase                                                           | 0.01043 | 0.05521 |
| 175 | IL6R     | interleukin 6 receptor                                                           | 0.01050 | 0.05527 |
| 176 | RP9      | retinitis pigmentosa 9 (autosomal dominant)                                      | 0.01099 | 0.05731 |
| 177 | CTSL2    | cathepsin L2                                                                     | 0.01101 | 0.05731 |

|     |              |                                                                                                    |         |         |
|-----|--------------|----------------------------------------------------------------------------------------------------|---------|---------|
| 178 | TNKS1BP1     | tankyrase 1 binding protein 1, 182kDa                                                              | 0.01109 | 0.05739 |
| 179 | STXBP1       | syntaxin binding protein 1                                                                         | 0.01160 | 0.05933 |
| 180 | PDPN         | podoplanin                                                                                         | 0.01160 | 0.05933 |
| 181 | PXDN         | peroxidasin homolog (Drosophila)                                                                   | 0.01173 | 0.05968 |
| 182 | VCL          | vinculin                                                                                           | 0.01185 | 0.05986 |
| 183 | PFKP         | phosphofructokinase, platelet                                                                      | 0.01189 | 0.05986 |
| 184 | LOC100132240 | hypothetical LOC100132240                                                                          | 0.01203 | 0.06007 |
| 185 | PRSS2        | protease, serine, 2 (trypsin 2)                                                                    | 0.01207 | 0.06007 |
| 186 | RAB38        | RAB38, member RAS oncogene family                                                                  | 0.01217 | 0.06028 |
| 187 | NCCRP1       | non-specific cytotoxic cell receptor protein 1 homolog (zebrafish)                                 | 0.01242 | 0.06118 |
| 188 | MT1A         | metallothionein 1A                                                                                 | 0.01256 | 0.06151 |
| 189 | GK5          | glycerol kinase 5 (putative)                                                                       | 0.01262 | 0.06151 |
| 190 | SPINK5       | serine peptidase inhibitor, Kazal type 5                                                           | 0.01287 | 0.06241 |
| 191 | IARS         | isoleucyl-tRNA synthetase                                                                          | 0.01319 | 0.06358 |
| 192 | MALT1        | mucosa associated lymphoid tissue lymphoma translocation gene 1                                    | 0.01360 | 0.06526 |
| 193 | EDN1         | endothelin 1                                                                                       | 0.01390 | 0.06630 |
| 194 | TRAF3IP2     | TRAF3 interacting protein 2                                                                        | 0.01413 | 0.06630 |
| 195 | TMEM189      | transmembrane protein 189                                                                          | 0.01414 | 0.06630 |
| 196 | TUBA8        | tubulin, alpha 8                                                                                   | 0.01414 | 0.06630 |
| 197 | AIG1         | androgen-induced 1                                                                                 | 0.01418 | 0.06630 |
| 198 | RHBDF1       | rhuboid 5 homolog 1 (Drosophila)                                                                   | 0.01508 | 0.07015 |
| 199 | HDAC7        | histone deacetylase 7                                                                              | 0.01532 | 0.07063 |
| 200 | JAG1         | jagged 1                                                                                           | 0.01541 | 0.07063 |
| 201 | NIPSNAP1     | nipsnap homolog 1 (C. elegans)                                                                     | 0.01546 | 0.07063 |
| 202 | ADA          | adenosine deaminase                                                                                | 0.01549 | 0.07063 |
| 203 | SBF1         | SET binding factor 1                                                                               | 0.01563 | 0.07064 |
| 204 | IL20RB       | interleukin 20 receptor beta                                                                       | 0.01565 | 0.07064 |
| 205 | CCDC85C      | coiled-coil domain containing 85C                                                                  | 0.01575 | 0.07077 |
| 206 | STX1A        | syntaxin 1A (brain)                                                                                | 0.01588 | 0.07098 |
| 207 | PAMR1        | peptidase domain containing associated with muscle regeneration 1                                  | 0.01606 | 0.07143 |
| 208 | PVRL1        | poliovirus receptor-related 1 (herpesvirus entry mediator C)                                       | 0.01644 | 0.07280 |
| 209 | EEF1E1       | eukaryotic translation elongation factor 1 epsilon 1                                               | 0.01671 | 0.07362 |
| 210 | SC5DL        | sterol-C5-desaturase (ERG3 delta-5-desaturase homolog, S. cerevisiae)-like                         | 0.01724 | 0.07563 |
| 211 | IGFBP4       | insulin-like growth factor binding protein 4                                                       | 0.01762 | 0.07693 |
| 212 | SDCBP2       | syndecan binding protein (syntenin) 2                                                              | 0.01833 | 0.07925 |
| 213 | FLJ13744     | uncharacterized FLJ13744                                                                           | 0.01838 | 0.07925 |
| 214 | TMSB15B      | thymosin beta 15B                                                                                  | 0.01841 | 0.07925 |
| 215 | COL7A1       | collagen, type VII, alpha 1                                                                        | 0.01996 | 0.08537 |
| 216 | DGKA         | diacylglycerol kinase, alpha 80kDa                                                                 | 0.02002 | 0.08537 |
| 217 | TPM1         | tropomyosin 1 (alpha)                                                                              | 0.02023 | 0.08587 |
| 218 | TTPAL        | tocopherol (alpha) transfer protein-like                                                           | 0.02133 | 0.09013 |
| 219 | THRB         | thyroid hormone receptor, beta (erythroblastic leukemia viral (v-erb-a) oncogene homolog 2, avian) | 0.02210 | 0.09296 |
| 220 | GJB2         | gap junction protein, beta 2, 26kDa                                                                | 0.02221 | 0.09300 |
| 221 | STC2         | stanniocalcin 2                                                                                    | 0.02356 | 0.09801 |
| 222 | LOC645937    | zinc finger protein 598 pseudogene                                                                 | 0.02363 | 0.09801 |
| 223 | LTBP4        | latent transforming growth factor beta binding protein 4                                           | 0.02386 | 0.09855 |
| 224 | GARS         | glycyl-tRNA synthetase                                                                             | 0.02470 | 0.10125 |
| 225 | EPS8L2       | EPS8-like 2                                                                                        | 0.02474 | 0.10125 |
| 226 | KCNMB4       | potassium large conductance calcium-activated channel, subfamily M, beta member 4                  | 0.02512 | 0.10238 |
| 227 | LOC100134237 | uncharacterized LOC100134237                                                                       | 0.02579 | 0.10465 |
| 228 | CABYR        | calcium binding tyrosine-(Y)-phosphorylation regulated                                             | 0.02831 | 0.11436 |
| 229 | SLC38A2      | solute carrier family 38, member 2                                                                 | 0.02888 | 0.11615 |
| 230 | FAM83F       | family with sequence similarity 83, member F                                                       | 0.02939 | 0.11717 |
| 231 | LEO1         | Leo1, Paf1/RNA polymerase II complex component, homolog (S. cerevisiae)                            | 0.02950 | 0.11717 |
| 232 | GPR126       | G protein-coupled receptor 126                                                                     | 0.02967 | 0.11717 |
| 233 | MF12         | antigen p97 (melanoma associated) identified by monoclonal antibodies 133.2 and 96.5               | 0.02975 | 0.11717 |
| 234 | EHBP1        | EH domain binding protein 1                                                                        | 0.02982 | 0.11717 |
| 235 | ADAM9        | ADAM metalloproteinase domain 9                                                                    | 0.02990 | 0.11717 |
| 236 | ULK1         | unc-51-like kinase 1 (C. elegans)                                                                  | 0.03027 | 0.11812 |
| 237 | KLK5         | kallikrein-related peptidase 5                                                                     | 0.03096 | 0.12030 |
| 238 | ARG2         | arginase, type II                                                                                  | 0.03115 | 0.12054 |

|     |              |                                                                                        |         |         |
|-----|--------------|----------------------------------------------------------------------------------------|---------|---------|
| 239 | HSD17B1      | hydroxysteroid (17-beta) dehydrogenase 1                                               | 0.03135 | 0.12082 |
| 240 | GUCA1B       | guanylate cyclase activator 1B (retina)                                                | 0.03155 | 0.12107 |
| 241 | PIGF         | phosphatidylinositol glycan anchor biosynthesis, class F                               | 0.03190 | 0.12190 |
| 242 | LEPREL1      | leprecan-like 1                                                                        | 0.03233 | 0.12306 |
| 243 | CLASP1       | cytoplasmic linker associated protein 1                                                | 0.03364 | 0.12740 |
| 244 | FAM45A       | family with sequence similarity 45, member A                                           | 0.03375 | 0.12740 |
| 245 | PRKAB2       | protein kinase, AMP-activated, beta 2 non-catalytic subunit                            | 0.03473 | 0.13057 |
| 246 | PLEKHG1      | pleckstrin homology domain containing, family G (with RhoGef domain) member 1          | 0.03500 | 0.13104 |
| 247 | CTDSPL       | CTD (carboxy-terminal domain, RNA polymerase II, polypeptide A) small phosphatase-like | 0.03528 | 0.13156 |
| 248 | ZNF219       | zinc finger protein 219                                                                | 0.03596 | 0.13354 |
| 249 | DUSP7        | dual specificity phosphatase 7                                                         | 0.03645 | 0.13384 |
| 250 | LAMC1        | laminin, gamma 1 (formerly LAMB2)                                                      | 0.03649 | 0.13384 |
| 251 | CRYAB        | crystallin, alpha B                                                                    | 0.03653 | 0.13384 |
| 252 | ARHGEF16     | Rho guanine nucleotide exchange factor (GEF) 16                                        | 0.03662 | 0.13384 |
| 253 | NPAS2        | neuronal PAS domain protein 2                                                          | 0.03730 | 0.13579 |
| 254 | PLCD1        | phospholipase C, delta 1                                                               | 0.03771 | 0.13675 |
| 255 | ETS2         | v-ets erythroblastosis virus E26 oncogene homolog 2 (avian)                            | 0.03848 | 0.13838 |
| 256 | NDUFAF2      | NADH dehydrogenase (ubiquinone) 1 alpha subcomplex, assembly factor 2                  | 0.03870 | 0.13838 |
| 257 | CKAP4        | cytoskeleton-associated protein 4                                                      | 0.03875 | 0.13838 |
| 258 | LOC100289600 | hypothetical protein LOC100289600                                                      | 0.03876 | 0.13838 |
| 259 | MFF          | mitochondrial fission factor                                                           | 0.03946 | 0.14032 |
| 260 | VEGFA        | vascular endothelial growth factor A                                                   | 0.04005 | 0.14187 |
| 261 | PYCR1        | pyrroline-5-carboxylate reductase 1                                                    | 0.04022 | 0.14192 |
| 262 | HAS3         | hyaluronan synthase 3                                                                  | 0.04068 | 0.14301 |
| 263 | MORC4        | MORC family CW-type zinc finger 4                                                      | 0.04084 | 0.14301 |
| 264 | CERCAM       | cerebral endothelial cell adhesion molecule                                            | 0.04135 | 0.14361 |
| 265 | SOX4         | SRY (sex determining region Y)-box 4                                                   | 0.04139 | 0.14361 |
| 266 | NELF         | nasal embryonic LHRH factor                                                            | 0.04148 | 0.14361 |
| 267 | PHLDB1       | pleckstrin homology-like domain, family B, member 1                                    | 0.04210 | 0.14522 |
| 268 | HS6ST1       | heparan sulfate 6-O-sulfotransferase 1                                                 | 0.04322 | 0.14851 |
| 269 | IMPDH2       | IMP (inosine 5'-monophosphate) dehydrogenase 2                                         | 0.04347 | 0.14883 |
| 270 | GABRE        | gamma-aminobutyric acid (GABA) A receptor, epsilon                                     | 0.04477 | 0.15256 |
| 271 | CASK         | calcium/calmodulin-dependent serine protein kinase (MAGUK family)                      | 0.04494 | 0.15256 |
| 272 | EIF4H        | eukaryotic translation initiation factor 4H                                            | 0.04513 | 0.15256 |
| 273 | TMEM8B       | transmembrane protein 8B                                                               | 0.04528 | 0.15256 |
| 274 | LTBP1        | latent transforming growth factor beta binding protein 1                               | 0.04539 | 0.15256 |
| 275 | DOCK6        | dedicator of cytokinesis 6                                                             | 0.04604 | 0.15419 |
| 276 | LOC100129532 | hypothetical LOC100129532                                                              | 0.04712 | 0.15725 |
| 277 | ATL2         | atlastin GTPase 2                                                                      | 0.04757 | 0.15815 |
| 278 | ENO2         | enolase 2 (gamma, neuronal)                                                            | 0.04811 | 0.15890 |
| 279 | SEC14L2      | SEC14-like 2 (S. cerevisiae)                                                           | 0.04814 | 0.15890 |
| 280 | SCRIB        | scribbled homolog (Drosophila)                                                         | 0.04854 | 0.15965 |
| 281 | ARL4C        | ADP-ribosylation factor-like 4C                                                        | 0.04972 | 0.16298 |
| 282 | SLC16A2      | solute carrier family 16, member 2 (monocarboxylic acid transporter 8)                 | 0.05129 | 0.16698 |
| 283 | B4GALT1      | UDP-Gal:betaGlcNAc beta 1,4-galactosyltransferase, polypeptide 1                       | 0.05131 | 0.16698 |
| 284 | CAV1         | caveolin 1, caveolae protein, 22kDa                                                    | 0.05149 | 0.16698 |
| 285 | CSorf38      | chromosome 5 open reading frame 38                                                     | 0.05218 | 0.16825 |
| 286 | KBTBD6       | kelch repeat and BTB (POZ) domain containing 6                                         | 0.05225 | 0.16825 |
| 287 | ALDH1L2      | aldehyde dehydrogenase 1 family, member L2                                             | 0.05244 | 0.16829 |
| 288 | TNFRSF10B    | tumor necrosis factor receptor superfamily, member 10b                                 | 0.05327 | 0.17034 |
| 289 | RPL27A       | ribosomal protein L27a                                                                 | 0.05383 | 0.17154 |
| 290 | RASL11B      | RAS-like, family 11, member B                                                          | 0.05404 | 0.17164 |
| 291 | TRIP10       | thyroid hormone receptor interactor 10                                                 | 0.05512 | 0.17402 |
| 292 | MKNK2        | MAP kinase interacting serine/threonine kinase 2                                       | 0.05517 | 0.17402 |
| 293 | PTPLB        | protein tyrosine phosphatase-like (proline instead of catalytic arginine), member b    | 0.05759 | 0.18083 |
| 294 | PAQR6        | progesterone and adipoQ receptor family member VI                                      | 0.05791 | 0.18083 |
| 295 | AVEN         | apoptosis, caspase activation inhibitor                                                | 0.05792 | 0.18083 |
| 296 | CCND2        | cyclin D2                                                                              | 0.05837 | 0.18162 |
| 297 | PTP4A1       | protein tyrosine phosphatase type IVA, member 1                                        | 0.05930 | 0.18390 |
| 298 | SAMD5        | sterile alpha motif domain containing 5                                                | 0.05989 | 0.18508 |
| 299 | IL17RD       | interleukin 17 receptor D                                                              | 0.06033 | 0.18583 |

|     |           |                                                                 |         |         |
|-----|-----------|-----------------------------------------------------------------|---------|---------|
| 300 | WBP5      | WW domain binding protein 5                                     | 0.06091 | 0.18700 |
| 301 | RBBP8     | retinoblastoma binding protein 8                                | 0.06157 | 0.18839 |
| 302 | CHST3     | carbohydrate (chondroitin 6) sulfotransferase 3                 | 0.06215 | 0.18954 |
| 303 | PPA1      | pyrophosphatase (inorganic) 1                                   | 0.06267 | 0.18994 |
| 304 | SH3GL1    | SH3-domain GRB2-like 1                                          | 0.06270 | 0.18994 |
| 305 | MAP3K6    | mitogen-activated protein kinase kinase kinase 6                | 0.06375 | 0.19250 |
| 306 | LOC613126 | uncharacterized LOC613126                                       | 0.06540 | 0.19684 |
| 307 | LAMB2     | laminin, beta 2 (laminin 5)                                     | 0.06612 | 0.19796 |
| 308 | DFNA5     | deafness, autosomal dominant 5                                  | 0.06620 | 0.19796 |
| 309 | RCN1      | reticulocalbin 1, EF-hand calcium binding domain                | 0.06645 | 0.19805 |
| 310 | NLE1      | notchless homolog 1 (Drosophila)                                | 0.06768 | 0.20108 |
| 311 | GNPNAT1   | glucosamine-phosphate N-acetyltransferase 1                     | 0.06855 | 0.20301 |
| 312 | ARPP19    | cAMP-regulated phosphoprotein, 19kDa                            | 0.06907 | 0.20370 |
| 313 | ZBED2     | zinc finger, BED-type containing 2                              | 0.06934 | 0.20370 |
| 314 | KCNG1     | potassium voltage-gated channel, subfamily G, member 1          | 0.06945 | 0.20370 |
| 315 | BCS1L     | BCS1-like (S. cerevisiae)                                       | 0.06997 | 0.20428 |
| 316 | LSR       | lipolysis stimulated lipoprotein receptor                       | 0.07009 | 0.20428 |
| 317 | ZNF812    | zinc finger protein 812                                         | 0.07037 | 0.20446 |
| 318 | TNS4      | tensin 4                                                        | 0.07062 | 0.20452 |
| 319 | GNB5      | guanine nucleotide binding protein (G protein), beta 5          | 0.07104 | 0.20511 |
| 320 | TSPAN9    | tetraspanin 9                                                   | 0.07264 | 0.20850 |
| 321 | NDRG1     | N-myc downstream regulated 1                                    | 0.07267 | 0.20850 |
| 322 | BDNF      | brain-derived neurotrophic factor                               | 0.07382 | 0.21115 |
| 323 | TCN1      | transcobalamin I (vitamin B12 binding protein, R binder family) | 0.07526 | 0.21460 |
| 324 | ULBP2     | UL16 binding protein 2                                          | 0.07648 | 0.21740 |
| 325 | GLRX3     | glutaredoxin 3                                                  | 0.07781 | 0.21983 |
| 326 | NDUFA4L2  | NADH dehydrogenase (ubiquinone) 1 alpha subcomplex, 4-like 2    | 0.07794 | 0.21983 |
| 327 | THSD1     | thrombospondin, type I, domain containing 1                     | 0.07823 | 0.21983 |
| 328 | MAP4K4    | mitogen-activated protein kinase kinase kinase kinase 4         | 0.07829 | 0.21983 |
| 329 | PLEK2     | pleckstrin 2                                                    | 0.07963 | 0.22291 |
| 330 | PLXNA2    | plexin A2                                                       | 0.08212 | 0.22868 |
| 331 | ANKH      | ankylosis, progressive homolog (mouse)                          | 0.08219 | 0.22868 |
| 332 | KIRREL    | kin of IRRE like (Drosophila)                                   | 0.08276 | 0.22915 |
| 333 | CAPRIN2   | caprin family member 2                                          | 0.08285 | 0.22915 |
| 334 | PTGFRN    | prostaglandin F2 receptor negative regulator                    | 0.08389 | 0.23132 |
| 335 | ARHGEF10  | Rho guanine nucleotide exchange factor (GEF) 10                 | 0.08462 | 0.23264 |
| 336 | BEX2      | brain expressed X-linked 2                                      | 0.08537 | 0.23400 |
| 337 | TOR1AIP2  | torsin A interacting protein 2                                  | 0.08614 | 0.23504 |
| 338 | DAB2IP    | DAB2 interacting protein                                        | 0.08626 | 0.23504 |
| 339 | FBLN1     | fibulin 1                                                       | 0.08694 | 0.23619 |
| 340 | RAB18     | RAB18, member RAS oncogene family                               | 0.08793 | 0.23820 |
| 341 | ALS2CL    | ALS2 C-terminal like                                            | 0.08987 | 0.24274 |
| 342 | POLH      | polymerase (DNA directed), eta                                  | 0.09096 | 0.24495 |
| 343 | SYNPO     | synaptopodin                                                    | 0.09196 | 0.24692 |
| 344 | GPC1      | glypican 1                                                      | 0.09301 | 0.24901 |
| 345 | BCL9L     | B-cell CLL/lymphoma 9-like                                      | 0.09353 | 0.24916 |
| 346 | BICD1     | bicaudal D homolog 1 (Drosophila)                               | 0.09373 | 0.24916 |
| 347 | RPL18A    | ribosomal protein L18a                                          | 0.09387 | 0.24916 |
| 348 | RTTN      | rotatin                                                         | 0.09516 | 0.25184 |
| 349 | SLC47A2   | solute carrier family 47, member 2                              | 0.09561 | 0.25231 |
| 350 | NIPA1     | non imprinted in Prader-Willi/Angelman syndrome 1               | 0.09661 | 0.25423 |
| 351 | SLC38A5   | solute carrier family 38, member 5                              | 0.09763 | 0.25619 |
| 352 | CBX1      | chromobox homolog 1                                             | 0.09968 | 0.26082 |
| 353 | SLC4A3    | solute carrier family 4, anion exchanger, member 3              | 0.10201 | 0.26615 |
| 354 | ITPR3     | inositol 1,4,5-trisphosphate receptor, type 3                   | 0.10240 | 0.26641 |
| 355 | FKBP1B    | FK506 binding protein 1B, 12.6 kDa                              | 0.10335 | 0.26739 |
| 356 | PPP1R3C   | protein phosphatase 1, regulatory subunit 3C                    | 0.10335 | 0.26739 |
| 357 | MORN4     | MORN repeat containing 4                                        | 0.10374 | 0.26762 |
| 358 | CBLC      | Cas-Br-M (murine) ecotropic retroviral transforming sequence c  | 0.10540 | 0.27116 |
| 359 | ACSL3     | acyl-CoA synthetase long-chain family member 3                  | 0.10629 | 0.27268 |
| 360 | NANOS1    | nanos homolog 1 (Drosophila)                                    | 0.10791 | 0.27578 |

|     |              |                                                                                                 |         |         |
|-----|--------------|-------------------------------------------------------------------------------------------------|---------|---------|
| 361 | FYN          | FYN oncogene related to SRC, FGR, YES                                                           | 0.10809 | 0.27578 |
| 362 | SBSN         | suprabasin                                                                                      | 0.10904 | 0.27667 |
| 363 | TMEM41B      | transmembrane protein 41B                                                                       | 0.10905 | 0.27667 |
| 364 | LOXL2        | lysyl oxidase-like 2                                                                            | 0.11128 | 0.28155 |
| 365 | MT2A         | metallothionein 2A                                                                              | 0.11403 | 0.28734 |
| 366 | ALDH3B2      | aldehyde dehydrogenase 3 family, member B2                                                      | 0.11512 | 0.28734 |
| 367 | WDHD1        | WD repeat and HMG-box DNA binding protein 1                                                     | 0.11540 | 0.28734 |
| 368 | CYP4F12      | cytochrome P450, family 4, subfamily F, polypeptide 12                                          | 0.11565 | 0.28734 |
| 369 | NDUFA12      | NADH dehydrogenase (ubiquinone) 1 alpha subcomplex, 12                                          | 0.11573 | 0.28734 |
| 370 | GAMT         | guanidinoacetate N-methyltransferase                                                            | 0.11603 | 0.28734 |
| 371 | ISL1         | ISL LIM homeobox 1                                                                              | 0.11605 | 0.28734 |
| 372 | CDC42BPG     | CDC42 binding protein kinase gamma (DMPK-like)                                                  | 0.11606 | 0.28734 |
| 373 | C17orf96     | chromosome 17 open reading frame 96                                                             | 0.11955 | 0.29519 |
| 374 | SH3PXD2A     | SH3 and PX domains 2A                                                                           | 0.11997 | 0.29529 |
| 375 | RAN          | RAN, member RAS oncogene family                                                                 | 0.12023 | 0.29529 |
| 376 | GSK3B        | glycogen synthase kinase 3 beta                                                                 | 0.12067 | 0.29558 |
| 377 | GAPDH        | glyceraldehyde-3-phosphate dehydrogenase                                                        | 0.12147 | 0.29675 |
| 378 | CLDND1       | claudin domain containing 1                                                                     | 0.12401 | 0.30162 |
| 379 | LAMA5        | laminin, alpha 5                                                                                | 0.12412 | 0.30162 |
| 380 | SLC29A4      | solute carrier family 29 (nucleoside transporters), member 4                                    | 0.12535 | 0.30380 |
| 381 | RARG         | retinoic acid receptor, gamma                                                                   | 0.12659 | 0.30542 |
| 382 | ERMP1        | endoplasmic reticulum metalloproteinase 1                                                       | 0.12668 | 0.30542 |
| 383 | C12orf54     | chromosome 12 open reading frame 54                                                             | 0.12777 | 0.30664 |
| 384 | HSPA9        | heat shock 70kDa protein 9 (mortalin)                                                           | 0.12785 | 0.30664 |
| 385 | USP46        | ubiquitin specific peptidase 46                                                                 | 0.12958 | 0.30925 |
| 386 | FTSJ1        | FtsJ homolog 1 (E. coli)                                                                        | 0.12961 | 0.30925 |
| 387 | ZP3          | zona pellucida glycoprotein 3 (sperm receptor)                                                  | 0.13152 | 0.31299 |
| 388 | FEZ1         | fasciculation and elongation protein zeta 1 (zyglin I)                                          | 0.13370 | 0.31737 |
| 389 | ZNF692       | zinc finger protein 692                                                                         | 0.13409 | 0.31748 |
| 390 | SERPINB5     | serpin peptidase inhibitor, clade B (ovalbumin), member 5                                       | 0.13546 | 0.31975 |
| 391 | COL17A1      | collagen, type XVII, alpha 1                                                                    | 0.13575 | 0.31975 |
| 392 | NME4         | non-metastatic cells 4, protein expressed in                                                    | 0.13765 | 0.32340 |
| 393 | TNFRSF18     | tumor necrosis factor receptor superfamily, member 18                                           | 0.13833 | 0.32418 |
| 394 | AFF4         | AF4/FMR2 family, member 4                                                                       | 0.13894 | 0.32477 |
| 395 | P4HA2        | prolyl 4-hydroxylase, alpha polypeptide II                                                      | 0.13945 | 0.32507 |
| 396 | SLC25A5      | solute carrier family 25 (mitochondrial carrier; adenine nucleotide translocator), member 5     | 0.13977 | 0.32507 |
| 397 | PMAIP1       | phorbol-12-myristate-13-acetate-induced protein 1                                               | 0.14099 | 0.32709 |
| 398 | NUMBL        | numb homolog (Drosophila)-like                                                                  | 0.14332 | 0.33165 |
| 399 | COPS8        | COP9 constitutive photomorphogenic homolog subunit 8 (Arabidopsis)                              | 0.14460 | 0.33378 |
| 400 | EFNA3        | ephrin-A3                                                                                       | 0.14582 | 0.33512 |
| 401 | PHF13        | PHD finger protein 13                                                                           | 0.14642 | 0.33512 |
| 402 | SOX15        | SRY (sex determining region Y)-box 15                                                           | 0.14654 | 0.33512 |
| 403 | C17orf69     | chromosome 17 open reading frame 69                                                             | 0.14664 | 0.33512 |
| 404 | GJB5         | gap junction protein, beta 5, 31.1kDa                                                           | 0.14719 | 0.33512 |
| 405 | GALNT5       | UDP-N-acetyl-alpha-D-galactosamine:polypeptide N-acetylgalactosaminyltransferase 5 (GalNAc-T5)  | 0.14737 | 0.33512 |
| 406 | BARX2        | BARX homeobox 2                                                                                 | 0.14820 | 0.33576 |
| 407 | SCAND3       | SCAN domain containing 3                                                                        | 0.14838 | 0.33576 |
| 408 | OLA1         | Obg-like ATPase 1                                                                               | 0.15061 | 0.33998 |
| 409 | DKK3         | dickkopf homolog 3 (Xenopus laevis)                                                             | 0.15271 | 0.34329 |
| 410 | C22orf43     | chromosome 22 open reading frame 43                                                             | 0.15282 | 0.34329 |
| 411 | LOC100128320 | uncharacterized protein LOC100128320                                                            | 0.15445 | 0.34610 |
| 412 | SEMA7A       | semaphorin 7A, GPI membrane anchor (John Milton Hagen blood group)                              | 0.15510 | 0.34673 |
| 413 | MTA3         | metastasis associated 1 family, member 3                                                        | 0.15573 | 0.34729 |
| 414 | RHOD         | ras homolog gene family, member D                                                               | 0.15662 | 0.34841 |
| 415 | BTBD11       | BTB (POZ) domain containing 11                                                                  | 0.16133 | 0.35803 |
| 416 | FRZB         | frizzled-related protein                                                                        | 0.16203 | 0.35824 |
| 417 | ANO4         | anoctamin 4                                                                                     | 0.16220 | 0.35824 |
| 418 | PODNL1       | podocan-like 1                                                                                  | 0.16332 | 0.35984 |
| 419 | LOC100129781 | hypothetical LOC100129781                                                                       | 0.16406 | 0.36013 |
| 420 | TNFAIP1      | tumor necrosis factor, alpha-induced protein 1 (endothelial)                                    | 0.16423 | 0.36013 |
| 421 | MLLT11       | myeloid/lymphoid or mixed-lineage leukemia (trithorax homolog, Drosophila); translocated to, 11 | 0.16499 | 0.36093 |

|     |              |                                                                               |         |         |
|-----|--------------|-------------------------------------------------------------------------------|---------|---------|
| 422 | EPHA2        | EPH receptor A2                                                               | 0.16630 | 0.36295 |
| 423 | PLP2         | proteolipid protein 2 (colonic epithelium-enriched)                           | 0.16727 | 0.36419 |
| 424 | TP63         | tumor protein p63                                                             | 0.16907 | 0.36725 |
| 425 | HES2         | hairy and enhancer of split 2 (Drosophila)                                    | 0.17231 | 0.37341 |
| 426 | KIF1C        | kinesin family member 1C                                                      | 0.17345 | 0.37499 |
| 427 | DAG1         | dystroglycan 1 (dystrophin-associated glycoprotein 1)                         | 0.17391 | 0.37510 |
| 428 | RPL7A        | ribosomal protein L7a                                                         | 0.17531 | 0.37724 |
| 429 | CGB          | chorionic gonadotropin, beta polypeptide                                      | 0.17595 | 0.37774 |
| 430 | MPST         | mercaptopyruvate sulfurtransferase                                            | 0.17734 | 0.37984 |
| 431 | PLEKHG4      | pleckstrin homology domain containing, family G (with RhoGef domain) member 4 | 0.17843 | 0.38129 |
| 432 | UBAP1        | ubiquitin associated protein 1                                                | 0.17911 | 0.38186 |
| 433 | KRT7         | keratin 7                                                                     | 0.18055 | 0.38403 |
| 434 | CDH16        | cadherin 16, KSP-cadherin                                                     | 0.18330 | 0.38817 |
| 435 | CLDN7        | claudin 7                                                                     | 0.18334 | 0.38817 |
| 436 | MIF          | macrophage migration inhibitory factor (glycosylation-inhibiting factor)      | 0.18392 | 0.38852 |
| 437 | MGC57346     | uncharacterized LOC401884                                                     | 0.18639 | 0.39282 |
| 438 | BAG3         | BCL2-associated athanogene 3                                                  | 0.18894 | 0.39730 |
| 439 | RPL39L       | ribosomal protein L39-like                                                    | 0.19011 | 0.39735 |
| 440 | LAD1         | ladinin 1                                                                     | 0.19027 | 0.39735 |
| 441 | FKBP9        | FK506 binding protein 9, 63 kDa                                               | 0.19047 | 0.39735 |
| 442 | SCARNA12     | small Cajal body-specific RNA 12                                              | 0.19069 | 0.39735 |
| 443 | RPF2         | ribosome production factor 2 homolog (S. cerevisiae)                          | 0.19317 | 0.40161 |
| 444 | CDKN1A       | cyclin-dependent kinase inhibitor 1A (p21, Cip1)                              | 0.19489 | 0.40426 |
| 445 | SPOCK1       | sparc/osteonectin, cwcv and kazal-like domains proteoglycan (testican) 1      | 0.19593 | 0.40550 |
| 446 | CAPN12       | calpain 12                                                                    | 0.19709 | 0.40700 |
| 447 | PLEKHH3      | pleckstrin homology domain containing, family H (with MYTH4 domain) member 3  | 0.19969 | 0.41143 |
| 448 | UCHL3        | ubiquitin carboxyl-terminal esterase L3 (ubiquitin thiolesterase)             | 0.20100 | 0.41321 |
| 449 | TYRO3        | TYRO3 protein tyrosine kinase                                                 | 0.20221 | 0.41478 |
| 450 | CIB2         | calcium and integrin binding family member 2                                  | 0.20333 | 0.41614 |
| 451 | TM7SF2       | transmembrane 7 superfamily member 2                                          | 0.20384 | 0.41627 |
| 452 | KRT13        | keratin 13                                                                    | 0.20647 | 0.42071 |
| 453 | TMEM38A      | transmembrane protein 38A                                                     | 0.21241 | 0.43137 |
| 454 | PLEKHG3      | pleckstrin homology domain containing, family G (with RhoGef domain) member 3 | 0.21264 | 0.43137 |
| 455 | CDH13        | cadherin 13, H-cadherin (heart)                                               | 0.21675 | 0.43875 |
| 456 | BCAS4        | breast carcinoma amplified sequence 4                                         | 0.21860 | 0.44151 |
| 457 | DTD1         | D-tyrosyl-tRNA deacylase 1 homolog (S. cerevisiae)                            | 0.21972 | 0.44280 |
| 458 | SIK1         | salt-inducible kinase 1                                                       | 0.22108 | 0.44350 |
| 459 | RIMS2        | regulating synaptic membrane exocytosis 2                                     | 0.22126 | 0.44350 |
| 460 | ARL4D        | ADP-ribosylation factor-like 4D                                               | 0.22151 | 0.44350 |
| 461 | CELSR2       | cadherin, EGF LAG seven-pass G-type receptor 2 (flamingo homolog, Drosophila) | 0.22430 | 0.44811 |
| 462 | SHC1         | SHC (Src homology 2 domain containing) transforming protein 1                 | 0.22608 | 0.45070 |
| 463 | PRSS3        | protease, serine, 3                                                           | 0.22845 | 0.45444 |
| 464 | YWHAQ        | tyrosine 3-monooxygenase/tryptophan 5-monooxygenase activation protein, theta | 0.22922 | 0.45460 |
| 465 | DAPK3        | death-associated protein kinase 3                                             | 0.22986 | 0.45460 |
| 466 | SPTBN1       | spectrin, beta, non-erythrocytic 1                                            | 0.23002 | 0.45460 |
| 467 | GGH          | gamma-glutamyl hydrolase (conjugase, foylpolgammaamglutamyl hydrolase)        | 0.23362 | 0.46074 |
| 468 | PHACTR3      | phosphatase and actin regulator 3                                             | 0.23496 | 0.46173 |
| 469 | PGF          | placental growth factor                                                       | 0.23513 | 0.46173 |
| 470 | LOC100128252 | uncharacterized LOC100128252                                                  | 0.23578 | 0.46203 |
| 471 | CALD1        | caldesmon 1                                                                   | 0.23676 | 0.46296 |
| 472 | GLIS2        | GLIS family zinc finger 2                                                     | 0.23827 | 0.46446 |
| 473 | PCBP4        | poly(rC) binding protein 4                                                    | 0.23885 | 0.46446 |
| 474 | PPP1R14B     | protein phosphatase 1, regulatory (inhibitor) subunit 14B                     | 0.23904 | 0.46446 |
| 475 | MTHFD2L      | methylenetetrahydrofolate dehydrogenase (NADP+ dependent) 2-like              | 0.23955 | 0.46447 |
| 476 | PCDHGB7      | protocadherin gamma subfamily B, 7                                            | 0.24133 | 0.46463 |
| 477 | EFEMP2       | EGF containing fibulin-like extracellular matrix protein 2                    | 0.24205 | 0.46463 |
| 478 | CSRP2        | cysteine and glycine-rich protein 2                                           | 0.24213 | 0.46463 |
| 479 | S100A2       | S100 calcium binding protein A2                                               | 0.24225 | 0.46463 |
| 480 | GJB3         | gap junction protein, beta 3, 31kDa                                           | 0.24251 | 0.46463 |
| 481 | SERPINB7     | serpin peptidase inhibitor, clade B (ovalbumin), member 7                     | 0.24266 | 0.46463 |
| 482 | MICALCL      | MICAL C-terminal like                                                         | 0.24614 | 0.47033 |



|     |           |                                                                               |         |         |
|-----|-----------|-------------------------------------------------------------------------------|---------|---------|
| 483 | YDJC      | YdjC homolog (bacterial)                                                      | 0.24718 | 0.47134 |
| 484 | COP22     | coatmer protein complex, subunit zeta 2                                       | 0.24905 | 0.47391 |
| 485 | BMS1      | BMS1 homolog, ribosome assembly protein (yeast)                               | 0.25267 | 0.47982 |
| 486 | CEACAM20  | carcinoembryonic antigen-related cell adhesion molecule 20                    | 0.25436 | 0.48179 |
| 487 | ZNF286B   | zinc finger protein 286B                                                      | 0.25476 | 0.48179 |
| 488 | STK24     | serine/threonine kinase 24                                                    | 0.25702 | 0.48506 |
| 489 | CCNB1IP1  | cyclin B1 interacting protein 1, E3 ubiquitin protein ligase                  | 0.25972 | 0.48917 |
| 490 | PTPN14    | protein tyrosine phosphatase, non-receptor type 14                            | 0.26029 | 0.48925 |
| 491 | ZNF57     | zinc finger protein 57                                                        | 0.26101 | 0.48959 |
| 492 | FBXL16    | F-box and leucine-rich repeat protein 16                                      | 0.26259 | 0.49060 |
| 493 | ZDBF2     | zinc finger, DBF-type containing 2                                            | 0.26261 | 0.49060 |
| 494 | VEGFC     | vascular endothelial growth factor C                                          | 0.26368 | 0.49159 |
| 495 | PCDHGA8   | protocadherin gamma subfamily A, 8                                            | 0.26493 | 0.49293 |
| 496 | STON2     | stonin 2                                                                      | 0.26576 | 0.49348 |
| 497 | RDX       | radixin                                                                       | 0.26956 | 0.49953 |
| 498 | PHGDH     | phosphoglycerate dehydrogenase                                                | 0.27133 | 0.50180 |
| 499 | KRT16     | keratin 16                                                                    | 0.27300 | 0.50250 |
| 500 | VAV2      | vav 2 guanine nucleotide exchange factor                                      | 0.27337 | 0.50250 |
| 501 | IGFBP6    | insulin-like growth factor binding protein 6                                  | 0.27377 | 0.50250 |
| 502 | NAGS      | N-acetylglutamate synthase                                                    | 0.27389 | 0.50250 |
| 503 | ALOX15B   | arachidonate 15-lipoxygenase, type B                                          | 0.27477 | 0.50311 |
| 504 | C8orf42   | chromosome 8 open reading frame 42                                            | 0.27742 | 0.50487 |
| 505 | TRIM46    | tripartite motif containing 46                                                | 0.27788 | 0.50487 |
| 506 | CERK      | ceramide kinase                                                               | 0.27793 | 0.50487 |
| 507 | SPATS2    | spermatogenesis associated, serine-rich 2                                     | 0.27844 | 0.50487 |
| 508 | CFL2      | cofilin 2 (muscle)                                                            | 0.27848 | 0.50487 |
| 509 | TPBG      | trophoblast glycoprotein                                                      | 0.27947 | 0.50489 |
| 510 | KCTD15    | potassium channel tetramerisation domain containing 15                        | 0.27958 | 0.50489 |
| 511 | TFAP2A    | transcription factor AP-2 alpha (activating enhancer binding protein 2 alpha) | 0.28295 | 0.50997 |
| 512 | UBE2E1    | ubiquitin-conjugating enzyme E2E 1                                            | 0.28415 | 0.51076 |
| 513 | C15orf41  | chromosome 15 open reading frame 41                                           | 0.28449 | 0.51076 |
| 514 | PPM1J     | protein phosphatase, Mg <sup>2+</sup> /Mn <sup>2+</sup> dependent, 1J         | 0.28569 | 0.51190 |
| 515 | LGALS7    | lectin, galactoside-binding, soluble, 7                                       | 0.28644 | 0.51225 |
| 516 | C14orf33  | chromosome 14 open reading frame 33                                           | 0.28761 | 0.51268 |
| 517 | GRHL3     | grainyhead-like 3 (Drosophila)                                                | 0.28852 | 0.51268 |
| 518 | RNF152    | ring finger protein 152                                                       | 0.28861 | 0.51268 |
| 519 | TNFAIP8L3 | tumor necrosis factor, alpha-induced protein 8-like 3                         | 0.28894 | 0.51268 |
| 520 | AGRN      | agrin                                                                         | 0.28946 | 0.51268 |
| 521 | HMGCS1    | 3-hydroxy-3-methylglutaryl-CoA synthase 1 (soluble)                           | 0.29176 | 0.51577 |
| 522 | SREBF2    | sterol regulatory element binding transcription factor 2                      | 0.29957 | 0.52856 |
| 523 | ANKIB1    | ankyrin repeat and IBR domain containing 1                                    | 0.30024 | 0.52872 |
| 524 | LOC648149 | uncharacterized protein LOC648149                                             | 0.30139 | 0.52973 |
| 525 | GRHL1     | grainyhead-like 1 (Drosophila)                                                | 0.30255 | 0.53076 |
| 526 | SLC22A3   | solute carrier family 22 (extraneuronal monoamine transporter), member 3      | 0.30344 | 0.53131 |
| 527 | KRT5      | keratin 5                                                                     | 0.30435 | 0.53190 |
| 528 | NCKAP5    | NCK-associated protein 5                                                      | 0.30499 | 0.53200 |
| 529 | BTG3      | BTG family, member 3                                                          | 0.30711 | 0.53385 |
| 530 | TMEM79    | transmembrane protein 79                                                      | 0.30829 | 0.53385 |
| 531 | WNT7B     | wingless-type MMTV integration site family, member 7B                         | 0.30868 | 0.53385 |
| 532 | UCN2      | urocortin 2                                                                   | 0.30925 | 0.53385 |
| 533 | CAMK2N1   | calcium/calmodulin-dependent protein kinase II inhibitor 1                    | 0.30934 | 0.53385 |
| 534 | TNC       | tenascin C                                                                    | 0.30953 | 0.53385 |
| 535 | MARS2     | methionyl-tRNA synthetase 2, mitochondrial                                    | 0.31225 | 0.53643 |
| 536 | TFPI2     | tissue factor pathway inhibitor 2                                             | 0.31275 | 0.53643 |
| 537 | FAM83H    | family with sequence similarity 83, member H                                  | 0.31277 | 0.53643 |
| 538 | F2R       | coagulation factor II (thrombin) receptor                                     | 0.31403 | 0.53758 |
| 539 | TCF7L1    | transcription factor 7-like 1 (T-cell specific, HMG-box)                      | 0.31590 | 0.53864 |
| 540 | VDAC2     | voltage-dependent anion channel 2                                             | 0.31623 | 0.53864 |
| 541 | CDC37L1   | cell division cycle 37 homolog (S. cerevisiae)-like 1                         | 0.31682 | 0.53864 |
| 542 | SLC16A14  | solute carrier family 16, member 14 (monocarboxylic acid transporter 14)      | 0.31699 | 0.53864 |
| 543 | PVRL3     | poliovirus receptor-related 3                                                 | 0.31803 | 0.53886 |

|     |              |                                                                                        |         |         |
|-----|--------------|----------------------------------------------------------------------------------------|---------|---------|
| 544 | SMTN         | smoothelin                                                                             | 0.31902 | 0.53886 |
| 545 | PEAR1        | platelet endothelial aggregation receptor 1                                            | 0.31917 | 0.53886 |
| 546 | SEC1         | secretory blood group 1                                                                | 0.31950 | 0.53886 |
| 547 | TNFRSF25     | tumor necrosis factor receptor superfamily, member 25                                  | 0.32021 | 0.53886 |
| 548 | RPSAP52      | ribosomal protein SA pseudogene 52                                                     | 0.32063 | 0.53886 |
| 549 | HRAS         | v-Ha-ras Harvey rat sarcoma viral oncogene homolog                                     | 0.32195 | 0.53949 |
| 550 | CYP27C1      | cytochrome P450, family 27, subfamily C, polypeptide 1                                 | 0.32307 | 0.53949 |
| 551 | HYAL1        | hyaluronoglucosaminidase 1                                                             | 0.32362 | 0.53949 |
| 552 | FAM189B      | family with sequence similarity 189, member B                                          | 0.32432 | 0.53949 |
| 553 | GTF2IRD1     | GTF2I repeat domain containing 1                                                       | 0.32445 | 0.53949 |
| 554 | MRPL36       | mitochondrial ribosomal protein L36                                                    | 0.32453 | 0.53949 |
| 555 | TNFSF9       | tumor necrosis factor (ligand) superfamily, member 9                                   | 0.32510 | 0.53949 |
| 556 | SKA2         | spindle and kinetochore associated complex subunit 2                                   | 0.32674 | 0.54123 |
| 557 | GPR87        | G protein-coupled receptor 87                                                          | 0.33006 | 0.54576 |
| 558 | FOXL1        | forkhead box L1                                                                        | 0.33168 | 0.54745 |
| 559 | DPH5         | DPH5 homolog ( <i>S. cerevisiae</i> )                                                  | 0.33421 | 0.55059 |
| 560 | LRRRC42      | leucine rich repeat containing 42                                                      | 0.33539 | 0.55059 |
| 561 | PAR6G        | par-6 partitioning defective 6 homolog gamma ( <i>C. elegans</i> )                     | 0.33635 | 0.55059 |
| 562 | SERPINB2     | serpin peptidase inhibitor, clade B (ovalbumin), member 2                              | 0.33659 | 0.55059 |
| 563 | GNG12        | guanine nucleotide binding protein (G protein), gamma 12                               | 0.33691 | 0.55059 |
| 564 | KIF3C        | kinesin family member 3C                                                               | 0.33717 | 0.55059 |
| 565 | ACTN4        | actinin, alpha 4                                                                       | 0.33806 | 0.55092 |
| 566 | ZNF323       | zinc finger protein 323                                                                | 0.33861 | 0.55092 |
| 567 | TMPRSS11F    | transmembrane protease, serine 11F                                                     | 0.33917 | 0.55092 |
| 568 | VASN         | vasorin                                                                                | 0.34339 | 0.55681 |
| 569 | JAG2         | jagged 2                                                                               | 0.34645 | 0.56078 |
| 570 | EPHA1        | EPH receptor A1                                                                        | 0.34808 | 0.56242 |
| 571 | CARS         | cysteinyI-tRNA synthetase                                                              | 0.34892 | 0.56279 |
| 572 | GLS2         | glutaminase 2 (liver, mitochondrial)                                                   | 0.35010 | 0.56370 |
| 573 | CAMK2G       | calcium/calmodulin-dependent protein kinase II gamma                                   | 0.35179 | 0.56545 |
| 574 | C16orf5      | chromosome 16 open reading frame 5                                                     | 0.35252 | 0.56563 |
| 575 | ELOVL4       | ELOVL fatty acid elongase 4                                                            | 0.35595 | 0.56935 |
| 576 | SPRR1A       | small proline-rich protein 1A                                                          | 0.35609 | 0.56935 |
| 577 | IMMP2L       | IMP2 inner mitochondrial membrane peptidase-like ( <i>S. cerevisiae</i> )              | 0.35670 | 0.56935 |
| 578 | MACROD1      | MACRO domain containing 1                                                              | 0.35754 | 0.56971 |
| 579 | ZFYVE9       | zinc finger, FYVE domain containing 9                                                  | 0.35948 | 0.57181 |
| 580 | RPL18        | ribosomal protein L18                                                                  | 0.36127 | 0.57238 |
| 581 | XYLT2        | xylosyltransferase II                                                                  | 0.36157 | 0.57238 |
| 582 | RPL8         | ribosomal protein L8                                                                   | 0.36170 | 0.57238 |
| 583 | EGFR         | epidermal growth factor receptor                                                       | 0.36247 | 0.57262 |
| 584 | NUDT11       | nudix (nucleoside diphosphate linked moiety X)-type motif 11                           | 0.36381 | 0.57375 |
| 585 | MARK1        | MAP/microtubule affinity-regulating kinase 1                                           | 0.36537 | 0.57523 |
| 586 | TCEA2        | transcription elongation factor A (SII), 2                                             | 0.36941 | 0.58058 |
| 587 | GPX3         | glutathione peroxidase 3 (plasma)                                                      | 0.37118 | 0.58135 |
| 588 | TMC7         | transmembrane channel-like 7                                                           | 0.37132 | 0.58135 |
| 589 | PTK7         | PTK7 protein tyrosine kinase 7                                                         | 0.37319 | 0.58135 |
| 590 | PCDHB8       | protocadherin beta 8                                                                   | 0.37347 | 0.58135 |
| 591 | SLC25A10     | solute carrier family 25 (mitochondrial carrier; dicarboxylate transporter), member 10 | 0.37384 | 0.58135 |
| 592 | BNC1         | basonuclin 1                                                                           | 0.37516 | 0.58135 |
| 593 | CHPF         | chondroitin polymerizing factor                                                        | 0.37534 | 0.58135 |
| 594 | DDIT4        | DNA-damage-inducible transcript 4                                                      | 0.37543 | 0.58135 |
| 595 | C11orf80     | chromosome 11 open reading frame 80                                                    | 0.37557 | 0.58135 |
| 596 | GRPEL2       | GrpE-like 2, mitochondrial ( <i>E. coli</i> )                                          | 0.37698 | 0.58254 |
| 597 | DGCR2        | DiGeorge syndrome critical region gene 2                                               | 0.38309 | 0.59100 |
| 598 | S1PR5        | sphingosine-1-phosphate receptor 5                                                     | 0.38405 | 0.59149 |
| 599 | FKBP10       | FK506 binding protein 10, 65 kDa                                                       | 0.38963 | 0.59908 |
| 600 | LOC100131067 | uncharacterized LOC100131067                                                           | 0.39246 | 0.59972 |
| 601 | ALDOC        | aldolase C, fructose-bisphosphate                                                      | 0.39252 | 0.59972 |
| 602 | PABPC4       | poly(A) binding protein, cytoplasmic 4 (inducible form)                                | 0.39309 | 0.59972 |
| 603 | KRT6B        | keratin 6B                                                                             | 0.39315 | 0.59972 |
| 604 | HES1         | hairy and enhancer of split 1, ( <i>Drosophila</i> )                                   | 0.39330 | 0.59972 |

|     |           |                                                                                               |         |         |
|-----|-----------|-----------------------------------------------------------------------------------------------|---------|---------|
| 605 | LRRFIP2   | leucine rich repeat (in FLII) interacting protein 2                                           | 0.39491 | 0.60117 |
| 606 | IPPK      | inositol 1,3,4,5,6-pentakisphosphate 2-kinase                                                 | 0.39757 | 0.60340 |
| 607 | ARPC5L    | actin related protein 2/3 complex, subunit 5-like                                             | 0.39776 | 0.60340 |
| 608 | WASF1     | WAS protein family, member 1                                                                  | 0.39833 | 0.60340 |
| 609 | RAB11FIP5 | RAB11 family interacting protein 5 (class I)                                                  | 0.40090 | 0.60628 |
| 610 | FAM25A    | family with sequence similarity 25, member A                                                  | 0.40351 | 0.60923 |
| 611 | TCF3      | transcription factor 3 (E2A immunoglobulin enhancer binding factors E12/E47)                  | 0.40482 | 0.60984 |
| 612 | RAG1      | recombination activating gene 1                                                               | 0.40524 | 0.60984 |
| 613 | MPZL1     | myelin protein zero-like 1                                                                    | 0.40616 | 0.61024 |
| 614 | C5orf23   | chromosome 5 open reading frame 23                                                            | 0.40778 | 0.61070 |
| 615 | NOB1      | NIN1/RPN12 binding protein 1 homolog (S. cerevisiae)                                          | 0.40779 | 0.61070 |
| 616 | TEAD2     | TEA domain family member 2                                                                    | 0.40945 | 0.61132 |
| 617 | RILPL1    | Rab interacting lysosomal protein-like 1                                                      | 0.40999 | 0.61132 |
| 618 | HSPB1     | heat shock 27kDa protein 1                                                                    | 0.41020 | 0.61132 |
| 619 | NXN       | nucleoredoxin                                                                                 | 0.41341 | 0.61447 |
| 620 | SPRR1B    | small proline-rich protein 1B                                                                 | 0.41365 | 0.61447 |
| 621 | POLR1D    | polymerase (RNA) I polypeptide D, 16kDa                                                       | 0.41596 | 0.61645 |
| 622 | LEMD1     | LEM domain containing 1                                                                       | 0.41632 | 0.61645 |
| 623 | HDFGRP3   | hepatoma-derived growth factor, related protein 3                                             | 0.42016 | 0.62113 |
| 624 | SPRR2E    | small proline-rich protein 2E                                                                 | 0.42166 | 0.62228 |
| 625 | KLHL23    | kelch-like 23 (Drosophila)                                                                    | 0.42228 | 0.62228 |
| 626 | IGSF9B    | immunoglobulin superfamily, member 9B                                                         | 0.42798 | 0.62924 |
| 627 | SERF1A    | small EDRK-rich factor 1A (telomeric)                                                         | 0.42838 | 0.62924 |
| 628 | EDNRA     | endothelin receptor type A                                                                    | 0.43165 | 0.63305 |
| 629 | VLDLR     | very low density lipoprotein receptor                                                         | 0.43284 | 0.63367 |
| 630 | BRMS1L    | breast cancer metastasis-suppressor 1-like                                                    | 0.43346 | 0.63367 |
| 631 | LPIN3     | lipin 3                                                                                       | 0.43726 | 0.63821 |
| 632 | SERPINA3  | serpin peptidase inhibitor, clade A (alpha-1 antiproteinase, antitrypsin), member 3           | 0.43838 | 0.63883 |
| 633 | E2F7      | E2F transcription factor 7                                                                    | 0.44335 | 0.64419 |
| 634 | OR6B3     | olfactory receptor, family 6, subfamily B, member 3                                           | 0.44345 | 0.64419 |
| 635 | OCA2      | oculocutaneous albinism II                                                                    | 0.44428 | 0.64438 |
| 636 | GOT1      | glutamic-oxaloacetic transaminase 1, soluble (aspartate aminotransferase 1)                   | 0.44593 | 0.64575 |
| 637 | PLCG1     | phospholipase C, gamma 1                                                                      | 0.44702 | 0.64632 |
| 638 | ABCF2     | ATP-binding cassette, sub-family F (GCN20), member 2                                          | 0.45164 | 0.65198 |
| 639 | FLJ32224  | uncharacterized LOC440584                                                                     | 0.45437 | 0.65420 |
| 640 | DSG3      | desmoglein 3                                                                                  | 0.45475 | 0.65420 |
| 641 | ODZ2      | odz, odd Oz/ten-m homolog 2 (Drosophila)                                                      | 0.45531 | 0.65420 |
| 642 | FRMD6     | FERM domain containing 6                                                                      | 0.45887 | 0.65829 |
| 643 | NFE2L1    | nuclear factor (erythroid-derived 2)-like 1                                                   | 0.45964 | 0.65837 |
| 644 | PORCN     | porcupine homolog (Drosophila)                                                                | 0.46749 | 0.66857 |
| 645 | C1QTNF6   | C1q and tumor necrosis factor related protein 6                                               | 0.46849 | 0.66896 |
| 646 | TUFT1     | tuftelin 1                                                                                    | 0.47009 | 0.67020 |
| 647 | SIGMAR1   | sigma non-opioid intracellular receptor 1                                                     | 0.47094 | 0.67037 |
| 648 | SHROOM2   | shroom family member 2                                                                        | 0.47491 | 0.67498 |
| 649 | TMEM22    | transmembrane protein 22                                                                      | 0.47583 | 0.67525 |
| 650 | KDEL1     | KDEL (Lys-Asp-Glu-Leu) containing 1                                                           | 0.47694 | 0.67579 |
| 651 | MMP15     | matrix metalloproteinase 15 (membrane-inserted)                                               | 0.48006 | 0.67916 |
| 652 | C1orf74   | chromosome 1 open reading frame 74                                                            | 0.48093 | 0.67936 |
| 653 | RHCG      | Rh family, C glycoprotein                                                                     | 0.48188 | 0.67965 |
| 654 | B4GALT2   | UDP-Gal:betaGlcNAc beta 1,4- galactosyltransferase, polypeptide 2                             | 0.48592 | 0.68430 |
| 655 | LYPD3     | LY6/PLAUR domain containing 3                                                                 | 0.48706 | 0.68485 |
| 656 | C6orf168  | chromosome 6 open reading frame 168                                                           | 0.48983 | 0.68711 |
| 657 | GPT2      | glutamic pyruvate transaminase (alanine aminotransferase) 2                                   | 0.49055 | 0.68711 |
| 658 | SERPINE1  | serpin peptidase inhibitor, clade E (nexin, plasminogen activator inhibitor type 1), member 1 | 0.49090 | 0.68711 |
| 659 | GRB14     | growth factor receptor-bound protein 14                                                       | 0.49637 | 0.69371 |
| 660 | KCNJ5     | potassium inwardly-rectifying channel, subfamily J, member 5                                  | 0.49975 | 0.69622 |
| 661 | FBXO17    | F-box protein 17                                                                              | 0.50028 | 0.69622 |
| 662 | EVC2      | Ellis van Creveld syndrome 2                                                                  | 0.50103 | 0.69622 |
| 663 | MXRA5     | matrix-remodelling associated 5                                                               | 0.50119 | 0.69622 |
| 664 | RPL35     | ribosomal protein L35                                                                         | 0.50410 | 0.69863 |
| 665 | RTKN      | rhotekin                                                                                      | 0.50489 | 0.69863 |

|     |               |                                                                                                                                             |         |         |
|-----|---------------|---------------------------------------------------------------------------------------------------------------------------------------------|---------|---------|
| 666 | SMO           | smoothened, frizzled family receptor                                                                                                        | 0.50520 | 0.69863 |
| 667 | BMP1          | bone morphogenetic protein 1                                                                                                                | 0.50781 | 0.70120 |
| 668 | DEPDC7        | DEP domain containing 7                                                                                                                     | 0.51332 | 0.70716 |
| 669 | C6orf141      | chromosome 6 open reading frame 141                                                                                                         | 0.51441 | 0.70716 |
| 670 | SEMA3F        | sema domain, immunoglobulin domain (Ig), short basic domain, secreted, (semaphorin) 3F                                                      | 0.51444 | 0.70716 |
| 671 | CLSTN3        | calsyntenin 3                                                                                                                               | 0.51742 | 0.70880 |
| 672 | CATSPERB      | cation channel, sperm-associated, beta                                                                                                      | 0.51755 | 0.70880 |
| 673 | ACBD6         | acyl-CoA binding domain containing 6                                                                                                        | 0.51868 | 0.70880 |
| 674 | SPAG4         | sperm associated antigen 4                                                                                                                  | 0.51871 | 0.70880 |
| 675 | RAC3          | ras-related C3 botulinum toxin substrate 3 (rho family, small GTP binding protein Rac3)                                                     | 0.52155 | 0.71163 |
| 676 | SEMA5B        | sema domain, seven thrombospondin repeats (type 1 and type 1-like), transmembrane domain (TM) and short cytoplasmic domain, (semaphorin) 5B | 0.52249 | 0.71186 |
| 677 | C17orf100     | chromosome 17 open reading frame 100                                                                                                        | 0.52332 | 0.71193 |
| 678 | FST           | follicle-stimulating hormone receptor                                                                                                       | 0.52435 | 0.71228 |
| 679 | HSPA4L        | heat shock 70kDa protein 4-like                                                                                                             | 0.53335 | 0.72344 |
| 680 | GNB2L1        | guanine nucleotide binding protein (G protein), beta polypeptide 2-like 1                                                                   | 0.53630 | 0.72637 |
| 681 | PHF21A        | PHD finger protein 21A                                                                                                                      | 0.53807 | 0.72721 |
| 682 | C19orf48      | chromosome 19 open reading frame 48                                                                                                         | 0.53879 | 0.72721 |
| 683 | CCDC64        | coiled-coil domain containing 64                                                                                                            | 0.53929 | 0.72721 |
| 684 | MTUS1         | microtubule associated tumor suppressor 1                                                                                                   | 0.54032 | 0.72754 |
| 685 | TES           | testis derived transcript (3 LIM domains)                                                                                                   | 0.54159 | 0.72818 |
| 686 | AIM1L         | absent in melanoma 1-like                                                                                                                   | 0.54278 | 0.72872 |
| 687 | CAPN14        | calpain 14                                                                                                                                  | 0.54805 | 0.73430 |
| 688 | D4S234E       | DNA segment on chromosome 4 (unique) 234 expressed sequence                                                                                 | 0.54853 | 0.73430 |
| 689 | EI24          | etoposide induced 2.4 mRNA                                                                                                                  | 0.55409 | 0.73895 |
| 690 | SDC1          | syndecan 1                                                                                                                                  | 0.55436 | 0.73895 |
| 691 | BTBD10        | BTB (POZ) domain containing 10                                                                                                              | 0.55442 | 0.73895 |
| 692 | MRPL12        | mitochondrial ribosomal protein L12                                                                                                         | 0.56087 | 0.74648 |
| 693 | GGN           | gametogenetin                                                                                                                               | 0.56256 | 0.74679 |
| 694 | ZP2           | zona pellucida glycoprotein 2 (sperm receptor)                                                                                              | 0.56273 | 0.74679 |
| 695 | RPS16         | ribosomal protein S16                                                                                                                       | 0.56355 | 0.74680 |
| 696 | GJB6          | gap junction protein, beta 6, 30kDa                                                                                                         | 0.56486 | 0.74747 |
| 697 | TMEM156       | transmembrane protein 156                                                                                                                   | 0.56656 | 0.74864 |
| 698 | IRS1          | insulin receptor substrate 1                                                                                                                | 0.56891 | 0.74979 |
| 699 | SMAGP         | small cell adhesion glycoprotein                                                                                                            | 0.56909 | 0.74979 |
| 700 | CCNA1         | cyclin A1                                                                                                                                   | 0.56987 | 0.74979 |
| 701 | EMD           | emerin                                                                                                                                      | 0.57095 | 0.75013 |
| 702 | GPSM2         | G-protein signaling modulator 2                                                                                                             | 0.57380 | 0.75281 |
| 703 | ADAM15        | ADAM metalloproteinase domain 15                                                                                                            | 0.57573 | 0.75426 |
| 704 | LOC100131820  | uncharacterized protein LOC100131820                                                                                                        | 0.57763 | 0.75568 |
| 705 | ZNF827        | zinc finger protein 827                                                                                                                     | 0.58194 | 0.76024 |
| 706 | NXP4          | neurexophilin 4                                                                                                                             | 0.58630 | 0.76464 |
| 707 | MLLT3         | myeloid/lymphoid or mixed-lineage leukemia (trithorax homolog, Drosophila); translocated to, 3                                              | 0.58778 | 0.76464 |
| 708 | ZNF862        | zinc finger protein 862                                                                                                                     | 0.58780 | 0.76464 |
| 709 | POMT2         | protein-O-mannosyltransferase 2                                                                                                             | 0.59110 | 0.76785 |
| 710 | RAPGEFL1      | Rap guanine nucleotide exchange factor (GEF)-like 1                                                                                         | 0.59223 | 0.76823 |
| 711 | C5orf28       | chromosome 5 open reading frame 28                                                                                                          | 0.59432 | 0.76986 |
| 712 | ELOVL6        | ELOVL fatty acid elongase 6                                                                                                                 | 0.59586 | 0.77076 |
| 713 | SNHG8         | small nucleolar RNA host gene 8 (non-protein coding)                                                                                        | 0.59744 | 0.77172 |
| 714 | DQX1          | DEAQ box RNA-dependent ATPase 1                                                                                                             | 0.60001 | 0.77291 |
| 715 | GNG8          | guanine nucleotide binding protein (G protein), gamma 8                                                                                     | 0.60003 | 0.77291 |
| 716 | AKTIP         | AKT interacting protein                                                                                                                     | 0.60267 | 0.77477 |
| 717 | C16orf88      | chromosome 16 open reading frame 88                                                                                                         | 0.60316 | 0.77477 |
| 718 | TGM1          | transglutaminase 1 (K polypeptide epidermal type I, protein-glutamine-gamma-glutamyltransferase)                                            | 0.60461 | 0.77556 |
| 719 | ARTN          | artemin                                                                                                                                     | 0.60779 | 0.77855 |
| 720 | SYT12         | synaptotagmin XII                                                                                                                           | 0.60981 | 0.77988 |
| 721 | DKFZP586K1520 | DKFZP586K1520 protein                                                                                                                       | 0.61052 | 0.77988 |
| 722 | AMN1          | antagonist of mitotic exit network 1 homolog (S. cerevisiae)                                                                                | 0.61139 | 0.77991 |
| 723 | IGF2BP3       | insulin-like growth factor 2 mRNA binding protein 3                                                                                         | 0.61382 | 0.78161 |
| 724 | GCAT          | glycine C-acetyltransferase                                                                                                                 | 0.61443 | 0.78161 |
| 725 | ZFP64         | zinc finger protein 64 homolog (mouse)                                                                                                      | 0.61667 | 0.78338 |
| 726 | MDFI          | MyoD family inhibitor                                                                                                                       | 0.61898 | 0.78421 |

|     |              |                                                                                       |         |         |
|-----|--------------|---------------------------------------------------------------------------------------|---------|---------|
| 727 | NFATC4       | nuclear factor of activated T-cells, cytoplasmic, calcineurin-dependent 4             | 0.61982 | 0.78421 |
| 728 | FKBP14       | FK506 binding protein 14, 22 kDa                                                      | 0.61988 | 0.78421 |
| 729 | PLCD3        | phospholipase C, delta 3                                                              | 0.62165 | 0.78537 |
| 730 | B4GALNT2     | beta-1,4-N-acetyl-galactosaminyl transferase 2                                        | 0.62275 | 0.78569 |
| 731 | CLTB         | clathrin, light chain B                                                               | 0.62472 | 0.78645 |
| 732 | UQCC         | ubiquinol-cytochrome c reductase complex chaperone                                    | 0.62584 | 0.78645 |
| 733 | RNF187       | ring finger protein 187                                                               | 0.62638 | 0.78645 |
| 734 | ARLSB        | ADP-ribosylation factor-like 5B                                                       | 0.62738 | 0.78645 |
| 735 | SFXN1        | sideroflexin 1                                                                        | 0.62762 | 0.78645 |
| 736 | KIAA1609     | KIAA1609                                                                              | 0.62973 | 0.78798 |
| 737 | LOC284219    | uncharacterized protein LOC284219                                                     | 0.63056 | 0.78798 |
| 738 | MTX2         | metaxin 2                                                                             | 0.63450 | 0.79183 |
| 739 | LOC100130938 | hypothetical LOC100130938                                                             | 0.63801 | 0.79513 |
| 740 | SPRR2A       | small proline-rich protein 2A                                                         | 0.63963 | 0.79608 |
| 741 | GPR68        | G protein-coupled receptor 68                                                         | 0.64195 | 0.79788 |
| 742 | DCUN1D5      | DCN1, defective in cullin neddylation 1, domain containing 5 ( <i>S. cerevisiae</i> ) | 0.64851 | 0.80495 |
| 743 | ZNF618       | zinc finger protein 618                                                               | 0.64957 | 0.80519 |
| 744 | IGF2         | insulin-like growth factor 2 (somatomedin A)                                          | 0.65452 | 0.80907 |
| 745 | ENDOD1       | endonuclease domain containing 1                                                      | 0.65497 | 0.80907 |
| 746 | GBE1         | glucan (1,4-alpha-), branching enzyme 1                                               | 0.65534 | 0.80907 |
| 747 | ARSJ         | arylsulfatase family, member J                                                        | 0.66057 | 0.81282 |
| 748 | PLS3         | plastin 3                                                                             | 0.66068 | 0.81282 |
| 749 | LOC100130580 | uncharacterized protein LOC100130580                                                  | 0.66103 | 0.81282 |
| 750 | TOMM20       | translocase of outer mitochondrial membrane 20 homolog (yeast)                        | 0.66424 | 0.81568 |
| 751 | WASF3        | WAS protein family, member 3                                                          | 0.67083 | 0.82268 |
| 752 | PPP1R13L     | protein phosphatase 1, regulatory subunit 13 like                                     | 0.67336 | 0.82392 |
| 753 | UGT1A8       | UDP glucuronosyltransferase 1 family, polypeptide A8                                  | 0.67427 | 0.82392 |
| 754 | TPI1         | triosephosphate isomerase 1                                                           | 0.67452 | 0.82392 |
| 755 | MGST1        | microsomal glutathione S-transferase 1                                                | 0.67778 | 0.82581 |
| 756 | CLDND2       | claudin domain containing 2                                                           | 0.67803 | 0.82581 |
| 757 | MRPS2        | mitochondrial ribosomal protein S2                                                    | 0.67876 | 0.82581 |
| 758 | HS6ST2       | heparan sulfate 6-O-sulfotransferase 2                                                | 0.68053 | 0.82688 |
| 759 | TCERG1       | transcription elongation regulator 1                                                  | 0.68422 | 0.82982 |
| 760 | FGF11        | fibroblast growth factor 11                                                           | 0.68476 | 0.82982 |
| 761 | ZNF665       | zinc finger protein 665                                                               | 0.68739 | 0.83064 |
| 762 | A2ML1        | alpha-2-macroglobulin-like 1                                                          | 0.68920 | 0.83064 |
| 763 | RBCK1        | RanBP-type and C3HC4-type zinc finger containing 1                                    | 0.68969 | 0.83064 |
| 764 | C6orf125     | chromosome 6 open reading frame 125                                                   | 0.68971 | 0.83064 |
| 765 | NTF4         | neurotrophin 4                                                                        | 0.68995 | 0.83064 |
| 766 | DNAJA3       | DnaJ (Hsp40) homolog, subfamily A, member 3                                           | 0.69349 | 0.83382 |
| 767 | ITGB6        | integrin, beta 6                                                                      | 0.69604 | 0.83579 |
| 768 | ERRF1        | ERBB receptor feedback inhibitor 1                                                    | 0.70460 | 0.84374 |
| 769 | SERINC2      | serine incorporator 2                                                                 | 0.70525 | 0.84374 |
| 770 | MTSS1L       | metastasis suppressor 1-like                                                          | 0.70541 | 0.84374 |
| 771 | S100A16      | S100 calcium binding protein A16                                                      | 0.70741 | 0.84504 |
| 772 | RAB6A        | RAB6A, member RAS oncogene family                                                     | 0.71092 | 0.84684 |
| 773 | RAET1E       | retinoic acid early transcript 1E                                                     | 0.71134 | 0.84684 |
| 774 | CLCA4        | chloride channel accessory 4                                                          | 0.71187 | 0.84684 |
| 775 | FAM83B       | family with sequence similarity 83, member B                                          | 0.71260 | 0.84684 |
| 776 | MBD5         | methyl-CpG binding domain protein 5                                                   | 0.71657 | 0.85047 |
| 777 | ADCY6        | adenylate cyclase 6                                                                   | 0.72122 | 0.85488 |
| 778 | TMEM184A     | transmembrane protein 184A                                                            | 0.72243 | 0.85522 |
| 779 | PTH1H        | parathyroid hormone-like hormone                                                      | 0.72600 | 0.85689 |
| 780 | RPAIN        | RPA interacting protein                                                               | 0.72736 | 0.85689 |
| 781 | TUBA3C       | tubulin, alpha 3c                                                                     | 0.72828 | 0.85689 |
| 782 | TTL12        | tubulin tyrosine ligase-like family, member 12                                        | 0.72861 | 0.85689 |
| 783 | CA12         | carbonic anhydrase XII                                                                | 0.73024 | 0.85689 |
| 784 | C17orf98     | chromosome 17 open reading frame 98                                                   | 0.73108 | 0.85689 |
| 785 | GSDMC        | gasdermin C                                                                           | 0.73132 | 0.85689 |
| 786 | FANCE        | Fanconi anemia, complementation group E                                               | 0.73391 | 0.85689 |
| 787 | GADD45A      | growth arrest and DNA-damage-inducible, alpha                                         | 0.73468 | 0.85689 |

|     |              |                                                                            |         |         |
|-----|--------------|----------------------------------------------------------------------------|---------|---------|
| 788 | LANCL1       | LanC lantibiotic synthetase component C-like 1 (bacterial)                 | 0.73472 | 0.85689 |
| 789 | KRT6C        | keratin 6C                                                                 | 0.73562 | 0.85689 |
| 790 | PHKA1        | phosphorylase kinase, alpha 1 (muscle)                                     | 0.73595 | 0.85689 |
| 791 | PHPT1        | phosphohistidine phosphatase 1                                             | 0.73635 | 0.85689 |
| 792 | RNF112       | ring finger protein 112                                                    | 0.73703 | 0.85689 |
| 793 | THOC3        | THO complex 3                                                              | 0.73861 | 0.85689 |
| 794 | RPL4         | ribosomal protein L4                                                       | 0.73873 | 0.85689 |
| 795 | NMT2         | N-myristoyltransferase 2                                                   | 0.74102 | 0.85846 |
| 796 | METTL5       | methyltransferase like 5                                                   | 0.74419 | 0.86105 |
| 797 | KLC3         | kinesin light chain 3                                                      | 0.75122 | 0.86788 |
| 798 | AFAP1        | actin filament associated protein 1                                        | 0.75235 | 0.86788 |
| 799 | NMU          | neuromedin U                                                               | 0.75292 | 0.86788 |
| 800 | MED21        | mediator complex subunit 21                                                | 0.75699 | 0.86986 |
| 801 | PHEX         | phosphate regulating endopeptidase homolog, X-linked                       | 0.75741 | 0.86986 |
| 802 | EGLN3        | egl nine homolog 3 (C. elegans)                                            | 0.75746 | 0.86986 |
| 803 | YIF1A        | Yip1 interacting factor homolog A (S. cerevisiae)                          | 0.76014 | 0.87067 |
| 804 | RPL10L       | ribosomal protein L10-like                                                 | 0.76112 | 0.87067 |
| 805 | CHAC1        | ChaC, cation transport regulator homolog 1 (E. coli)                       | 0.76135 | 0.87067 |
| 806 | ABCA12       | ATP-binding cassette, sub-family A (ABC1), member 12                       | 0.76195 | 0.87067 |
| 807 | KRT75        | keratin 75                                                                 | 0.76616 | 0.87439 |
| 808 | SARS         | seryl-tRNA synthetase                                                      | 0.76780 | 0.87446 |
| 809 | POPDC3       | popeye domain containing 3                                                 | 0.76876 | 0.87446 |
| 810 | DSC3         | desmocollin 3                                                              | 0.76992 | 0.87446 |
| 811 | UQCRH        | ubiquinol-cytochrome c reductase hinge protein                             | 0.77091 | 0.87446 |
| 812 | PRMT1        | protein arginine methyltransferase 1                                       | 0.77136 | 0.87446 |
| 813 | GAS5         | growth arrest-specific 5 (non-protein coding)                              | 0.77502 | 0.87446 |
| 814 | LOC100216001 | uncharacterized LOC100216001                                               | 0.77505 | 0.87446 |
| 815 | PACSIN3      | protein kinase C and casein kinase substrate in neurons 3                  | 0.77512 | 0.87446 |
| 816 | PKP1         | plakophilin 1 (ectodermal dysplasia/skin fragility syndrome)               | 0.77521 | 0.87446 |
| 817 | ADK          | adenosine kinase                                                           | 0.77571 | 0.87446 |
| 818 | TEPP         | testis, prostate and placenta expressed                                    | 0.77840 | 0.87641 |
| 819 | PMEPA1       | prostate transmembrane protein, androgen induced 1                         | 0.78171 | 0.87667 |
| 820 | PHYHIP       | phytanoyl-CoA 2-hydroxylase interacting protein                            | 0.78181 | 0.87667 |
| 821 | LOC729242    | similar to keratin 17                                                      | 0.78186 | 0.87667 |
| 822 | C18orf56     | chromosome 18 open reading frame 56                                        | 0.78381 | 0.87667 |
| 823 | REXO2        | REX2, RNA exonuclease 2 homolog (S. cerevisiae)                            | 0.78410 | 0.87667 |
| 824 | ENTPD7       | ectonucleoside triphosphate diphosphohydrolase 7                           | 0.78433 | 0.87667 |
| 825 | HSD17B2      | hydroxysteroid (17-beta) dehydrogenase 2                                   | 0.78750 | 0.87914 |
| 826 | ALKBH2       | alkB, alkylation repair homolog 2 (E. coli)                                | 0.79129 | 0.88229 |
| 827 | GALE         | UDP-galactose-4-epimerase                                                  | 0.79475 | 0.88473 |
| 828 | KLK7         | kallikrein-related peptidase 7                                             | 0.79540 | 0.88473 |
| 829 | FAM83A       | family with sequence similarity 83, member A                               | 0.79800 | 0.88656 |
| 830 | CAPNS2       | calpain, small subunit 2                                                   | 0.79995 | 0.88766 |
| 831 | DNAH14       | dynein, axonemal, heavy chain 14                                           | 0.80361 | 0.89064 |
| 832 | ARMC10       | armadillo repeat containing 10                                             | 0.80675 | 0.89305 |
| 833 | IFNE         | interferon, epsilon                                                        | 0.81110 | 0.89641 |
| 834 | RPL29P2      | ribosomal protein L29 pseudogene 2                                         | 0.81173 | 0.89641 |
| 835 | PRRG2        | proline rich Gla (G-carboxyglutamic acid) 2                                | 0.81489 | 0.89882 |
| 836 | COL4A6       | collagen, type IV, alpha 6                                                 | 0.81587 | 0.89883 |
| 837 | C14orf176    | chromosome 14 open reading frame 176                                       | 0.81691 | 0.89890 |
| 838 | FNDC4        | fibronectin type III domain containing 4                                   | 0.82131 | 0.90266 |
| 839 | C9orf169     | chromosome 9 open reading frame 169                                        | 0.82541 | 0.90533 |
| 840 | PAFAH1B3     | platelet-activating factor acetylhydrolase 1b, catalytic subunit 3 (29kDa) | 0.82571 | 0.90533 |
| 841 | RCOR2        | REST corepressor 2                                                         | 0.82752 | 0.90624 |
| 842 | KRT33B       | keratin 33B                                                                | 0.83019 | 0.90808 |
| 843 | LOC100133089 | uncharacterized protein LOC100133089                                       | 0.83536 | 0.91056 |
| 844 | ARF5         | ADP-ribosylation factor 5                                                  | 0.83588 | 0.91056 |
| 845 | WNT7A        | wingless-type MMTV integration site family, member 7A                      | 0.83641 | 0.91056 |
| 846 | CSE1L        | CSE1 chromosome segregation 1-like (yeast)                                 | 0.83738 | 0.91056 |
| 847 | EDA2R        | ectodysplasin A2 receptor                                                  | 0.83740 | 0.91056 |
| 848 | FRMD5        | FERM domain containing 5                                                   | 0.84405 | 0.91671 |

|     |              |                                                                                                     |         |         |
|-----|--------------|-----------------------------------------------------------------------------------------------------|---------|---------|
| 849 | KIAA0391     | KIAA0391                                                                                            | 0.85156 | 0.92282 |
| 850 | SLC1A5       | solute carrier family 1 (neutral amino acid transporter), member 5                                  | 0.85168 | 0.92282 |
| 851 | HRSP12       | heat-responsive protein 12                                                                          | 0.85641 | 0.92685 |
| 852 | IGSF3        | immunoglobulin superfamily, member 3                                                                | 0.85930 | 0.92883 |
| 853 | TM7SF3       | transmembrane 7 superfamily member 3                                                                | 0.86025 | 0.92883 |
| 854 | EDIL3        | EGF-like repeats and discoidin I-like domains 3                                                     | 0.86397 | 0.93072 |
| 855 | CTNND1       | catenin (cadherin-associated protein), delta 1                                                      | 0.86402 | 0.93072 |
| 856 | B3GNT4       | UDP-GlcNAc:betaGal beta-1,3-N-acetylglucosaminyltransferase 4                                       | 0.86543 | 0.93114 |
| 857 | RBP1         | retinol binding protein 1, cellular                                                                 | 0.86685 | 0.93158 |
| 858 | DNAJC1       | DnaJ (Hsp40) homolog, subfamily C, member 1                                                         | 0.86962 | 0.93337 |
| 859 | AKR1B15      | aldo-keto reductase family 1, member B15                                                            | 0.87211 | 0.93337 |
| 860 | DCTN2        | dynactin 2 (p50)                                                                                    | 0.87324 | 0.93337 |
| 861 | RSL24D1      | ribosomal L24 domain containing 1                                                                   | 0.87350 | 0.93337 |
| 862 | TMEM147      | transmembrane protein 147                                                                           | 0.87358 | 0.93337 |
| 863 | NHP2L1       | NHP2 non-histone chromosome protein 2-like 1 (S. cerevisiae)                                        | 0.88014 | 0.93929 |
| 864 | ERO1L        | ERO1-like (S. cerevisiae)                                                                           | 0.88247 | 0.93971 |
| 865 | LOXL1        | lysyl oxidase-like 1                                                                                | 0.88423 | 0.93971 |
| 866 | PADI1        | peptidyl arginine deiminase, type I                                                                 | 0.88520 | 0.93971 |
| 867 | S100A3       | S100 calcium binding protein A3                                                                     | 0.88541 | 0.93971 |
| 868 | RPS3         | ribosomal protein S3                                                                                | 0.88625 | 0.93971 |
| 869 | SHMT2        | serine hydroxymethyltransferase 2 (mitochondrial)                                                   | 0.88818 | 0.93971 |
| 870 | KLK8         | kallikrein-related peptidase 8                                                                      | 0.88911 | 0.93971 |
| 871 | FAM160A1     | family with sequence similarity 160, member A1                                                      | 0.89054 | 0.93971 |
| 872 | STK32A       | serine/threonine kinase 32A                                                                         | 0.89162 | 0.93971 |
| 873 | RPL10        | ribosomal protein L10                                                                               | 0.89162 | 0.93971 |
| 874 | RRP1B        | ribosomal RNA processing 1 homolog B (S. cerevisiae)                                                | 0.89175 | 0.93971 |
| 875 | HDAC11       | histone deacetylase 11                                                                              | 0.89298 | 0.93992 |
| 876 | PRR5-ARHGAP8 | PRR5-ARHGAP8 readthrough                                                                            | 0.89504 | 0.94102 |
| 877 | C14orf2      | chromosome 14 open reading frame 2                                                                  | 0.90062 | 0.94580 |
| 878 | ZNF251       | zinc finger protein 251                                                                             | 0.90194 | 0.94584 |
| 879 | CA11         | carbonic anhydrase XI                                                                               | 0.90484 | 0.94584 |
| 880 | CPS1         | carbamoyl-phosphate synthase 1, mitochondrial                                                       | 0.90548 | 0.94584 |
| 881 | EPHX4        | epoxide hydrolase 4                                                                                 | 0.90577 | 0.94584 |
| 882 | GDPD1        | glycerophosphodiester phosphodiesterase domain containing 1                                         | 0.90579 | 0.94584 |
| 883 | LRRRC16A     | leucine rich repeat containing 16A                                                                  | 0.90823 | 0.94731 |
| 884 | H2BFM        | H2B histone family, member M                                                                        | 0.90982 | 0.94790 |
| 885 | RIN1         | Ras and Rab interactor 1                                                                            | 0.91197 | 0.94907 |
| 886 | SOX7         | SRY (sex determining region Y)-box 7                                                                | 0.91606 | 0.95018 |
| 887 | KHDC1        | KH homology domain containing 1                                                                     | 0.91609 | 0.95018 |
| 888 | RHOC         | ras homolog gene family, member C                                                                   | 0.91727 | 0.95018 |
| 889 | RAD52        | RAD52 homolog (S. cerevisiae)                                                                       | 0.91907 | 0.95018 |
| 890 | TSPAN7       | tetraspanin 7                                                                                       | 0.91911 | 0.95018 |
| 891 | SERPINH1     | serpin peptidase inhibitor, clade H (heat shock protein 47), member 1, (collagen binding protein 1) | 0.91923 | 0.95018 |
| 892 | AASS         | aminoadipate-semialdehyde synthase                                                                  | 0.92305 | 0.95217 |
| 893 | CAV3         | caveolin 3                                                                                          | 0.92322 | 0.95217 |
| 894 | PNLIPRP3     | pancreatic lipase-related protein 3                                                                 | 0.92473 | 0.95266 |
| 895 | LYSMD1       | LysM, putative peptidoglycan-binding, domain containing 1                                           | 0.92714 | 0.95408 |
| 896 | EPHB4        | EPH receptor B4                                                                                     | 0.93778 | 0.96336 |
| 897 | NLGN4X       | neuroligin 4, X-linked                                                                              | 0.93826 | 0.96336 |
| 898 | C1orf210     | chromosome 1 open reading frame 210                                                                 | 0.93944 | 0.96350 |
| 899 | RNF167       | ring finger protein 167                                                                             | 0.94292 | 0.96436 |
| 900 | ANO9         | anoctamin 9                                                                                         | 0.94428 | 0.96436 |
| 901 | XPOT         | exportin, tRNA (nuclear export receptor for tRNAs)                                                  | 0.94465 | 0.96436 |
| 902 | SLC2A4RG     | SLC2A4 regulator                                                                                    | 0.94562 | 0.96436 |
| 903 | FBXO27       | F-box protein 27                                                                                    | 0.94574 | 0.96436 |
| 904 | PTGR1        | prostaglandin reductase 1                                                                           | 0.94696 | 0.96436 |
| 905 | EIF3L        | eukaryotic translation initiation factor 3, subunit L                                               | 0.94761 | 0.96436 |
| 906 | B4GALNT4     | beta-1,4-N-acetyl-galactosaminyl transferase 4                                                      | 0.95251 | 0.96825 |
| 907 | PTK6         | PTK6 protein tyrosine kinase 6                                                                      | 0.95353 | 0.96825 |
| 908 | OLFML2A      | olfactomedin-like 2A                                                                                | 0.95606 | 0.96975 |
| 909 | NOXO1        | NADPH oxidase organizer 1                                                                           | 0.96061 | 0.97316 |

|     |          |                                                                                                           |         |         |
|-----|----------|-----------------------------------------------------------------------------------------------------------|---------|---------|
| 910 | ANTXR1   | anthrax toxin receptor 1                                                                                  | 0.96154 | 0.97316 |
| 911 | AFAP1L2  | actin filament associated protein 1-like 2                                                                | 0.96606 | 0.97629 |
| 912 | ZNF532   | zinc finger protein 532                                                                                   | 0.96674 | 0.97629 |
| 913 | MARVELD3 | MARVEL domain containing 3                                                                                | 0.96995 | 0.97845 |
| 914 | DKK1     | dickkopf homolog 1 (Xenopus laevis)                                                                       | 0.97434 | 0.98180 |
| 915 | VSTM2A   | V-set and transmembrane domain containing 2A                                                              | 0.97642 | 0.98283 |
| 916 | ARHGAP21 | Rho GTPase activating protein 21                                                                          | 0.97835 | 0.98284 |
| 917 | PPFIA4   | protein tyrosine phosphatase, receptor type, f polypeptide (PTPRF), interacting protein (liprin), alpha 4 | 0.97857 | 0.98284 |
| 918 | EIF2B2   | eukaryotic translation initiation factor 2B, subunit 2 beta, 39kDa                                        | 0.98537 | 0.98859 |
| 919 | NT5M     | 5',3'-nucleotidase, mitochondrial                                                                         | 0.99460 | 0.99588 |
| 920 | CA9      | carbonic anhydrase IX                                                                                     | 0.99480 | 0.99588 |
| 921 | C16orf74 | chromosome 16 open reading frame 74                                                                       | 0.99652 | 0.99652 |

\* P-value and FDR computed for univariate analysis of association with mortality in the Freiburg cohort adjusted for age and gender



**Table E10. ABC Signature picked by Componentwise Boosting**

| <b>Table E10. ABC Gene Signature developed by Componentwise Boosting</b> |                                                                                        |                    |            |               |
|--------------------------------------------------------------------------|----------------------------------------------------------------------------------------|--------------------|------------|---------------|
| <b>Gene Symbol</b>                                                       | <b>Gene Name</b>                                                                       | <b>Beta-value*</b> | <b>FDR</b> | <b>Freq**</b> |
| S100A14                                                                  | S100 calcium binding protein A14                                                       | 0.264564775        | 8.65E-07   | 0.98          |
| SLC16A1                                                                  | Solute carrier family 16, member 1                                                     | 0.459126634        | 0.00041    | 0.61          |
| NRG1                                                                     | Neuregulin 1                                                                           | 0.110035791        | 3.95E-05   | 0.58          |
| GALNT14                                                                  | UDP-N-acetyl-alpha-D-galactosamine:polypeptide<br>N-acetylgalactosaminyltransferase 14 | 0.088291498        | 1.74E-05   | 0.55          |
| ADM                                                                      | Adrenomedullin                                                                         | 0.088018716        | 1.91E-05   | 0.47          |
| RAB3D                                                                    | RAB3D, member RAS oncogene family                                                      | 0.148806164        | 4.33E-05   | 0.39          |
| ANXA3                                                                    | Annexin A3                                                                             | 0.018785012        | 0.00037    | 0.31          |
| CCNJL                                                                    | Cyclin J-like                                                                          | 0.074435128        | 4.33E-05   | 0.29          |
| SLC7A11                                                                  | Solute carrier family 7 member 11                                                      | 0.023982017        | 0.00080    | 0.23          |
| KLK6                                                                     | kallikrein-related peptidase 6                                                         | 0.04082356         | 0.00776    | 0.20          |
| ZNF703                                                                   | zinc finger protein 703                                                                | 0.062170248        | 0.00357    | 0.08          |
| MRC2                                                                     | mannose receptor, C type 2                                                             | 0.070080375        | 0.02628    | 0.06          |
| SOX4                                                                     | SRY (sex determining region Y)-box 4                                                   | -0.01388770        | 0.14361    | 0.05          |
| RGS20                                                                    | regulator of G-protein signaling 20                                                    | 0.010046361        | 0.01831    | 0.03          |
| CHCHD6                                                                   | coiled-coil-helix-coiled-coil-helix domain containing 6                                | -0.05261972        | 0.01068    | 0.02          |
| NDUFA4L2                                                                 | NADH dehydrogenase 1 alpha subcomplex, 4-like 2                                        | 0.09780996         | 0.21983    | 0.01          |

\*Estimated multivariable regression parameters (Beta-value), i.e., conditional log-hazard ratios, from componentwise boosting and univariate FDR computed for association with mortality in the Freiburg cohort.

\*\*For each gene the relative frequency of inclusion into the signature (the resampling inclusion frequency (Freq) from 100 resampling data sets) was recorded.

**Table E11. C-Indices and confidence intervals for the ABC survival models**

| <b>Table E11. C-Indices and confidence intervals for the ABC survival models</b> |                 |             |              |
|----------------------------------------------------------------------------------|-----------------|-------------|--------------|
|                                                                                  | <b>c-index*</b> | <b>2.5%</b> | <b>97.5%</b> |
| <b>Freiburg Signature + GAP</b>                                                  | 0.728           | 0.661       | 0.805        |
| <b>Freiburg Signature</b>                                                        | 0.688           | 0.622       | 0.752        |
| <b>Freiburg GAP</b>                                                              | 0.602           | 0.526       | 0.686        |
| <b>Leuven Signature + GAP</b>                                                    | 0.791           | 0.698       | 0.880        |
| <b>Leuven Signature</b>                                                          | 0.712           | 0.610       | 0.805        |
| <b>Leuven GAP</b>                                                                | 0.709           | 0.606       | 0.801        |
| <b>Siena Signature + GAP</b>                                                     | 0.749           | 0.654       | 0.847        |
| <b>Siena Signature</b>                                                           | 0.674           | 0.588       | 0.754        |
| <b>Siena GAP</b>                                                                 | 0.639           | 0.559       | 0.747        |

\* C-indices and 95% confidence interval for models that predict patient survival either using the GAP index only, the grouping of patients based on the inferred gene expression signature or a combination of both. The gene expression signature was inferred using only the ABC genes.

**Figure E1. Study Design**

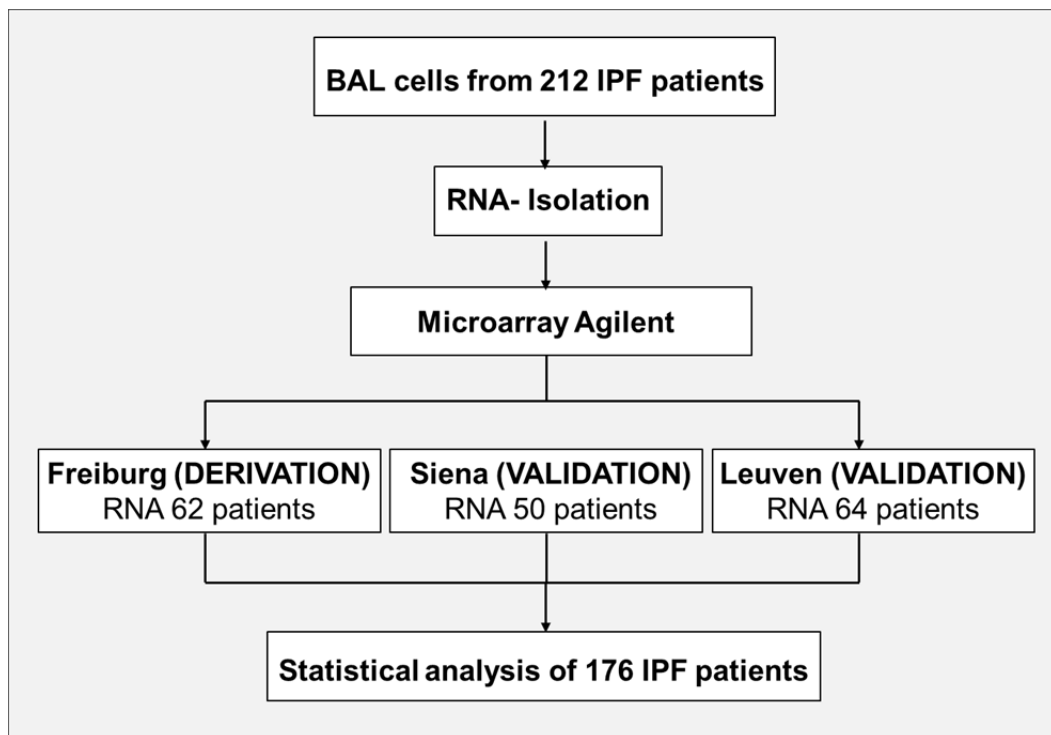

**Figure E1. Study design.** BAL cells from 212 IPF patients were harvested in TRIzol at 3 different tertiary referral centers: Freiburg (Germany), Siena (Italy) and Leuven (Belgium). Next, RNA was isolated and RNA yield and integrity measured. This resulted in 184 RNA samples with good quality which were labelled and hybridized to 8 x 60K Agilent Whole Human Genome arrays. After quality control a final data set of 176 patients were used for statistical analysis.

## Figure E2. Sorting Strategy for Alveolar Macrophages

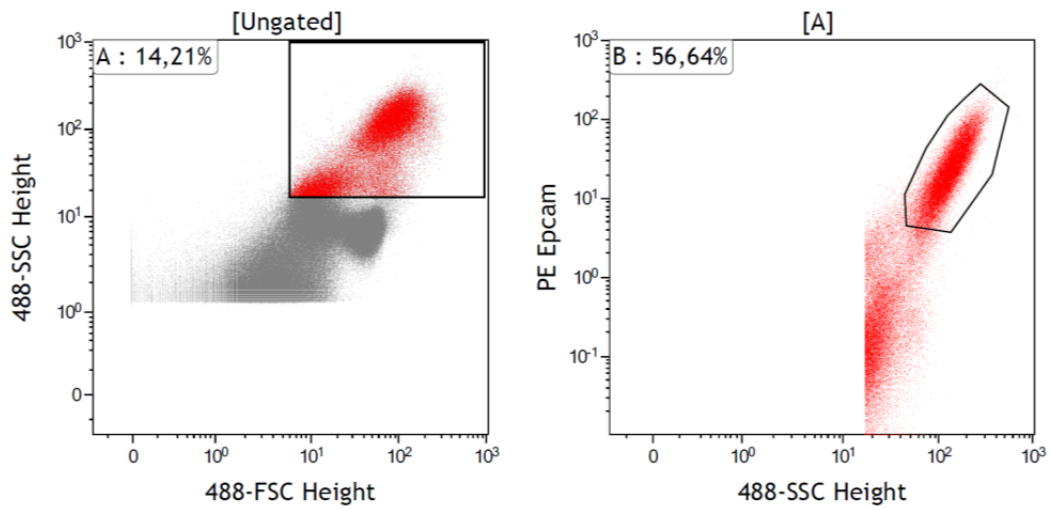

**Figure E2. Sorting strategy for alveolar macrophages.** Alveolar macrophages were sorted from BAL of healthy subjects using cell characteristics in the Forward Scatter (FSC) and Sideward Scatter. Gated cells are shown in red (Panel A). Next, these gated cells were depicted in a plot for SSC and PE staining and alveolar macrophages were delineated on the basis of autofluorescence and negative staining for EPCAM.

**Figure E3. Determination of the Airway Basal Cell Signature**

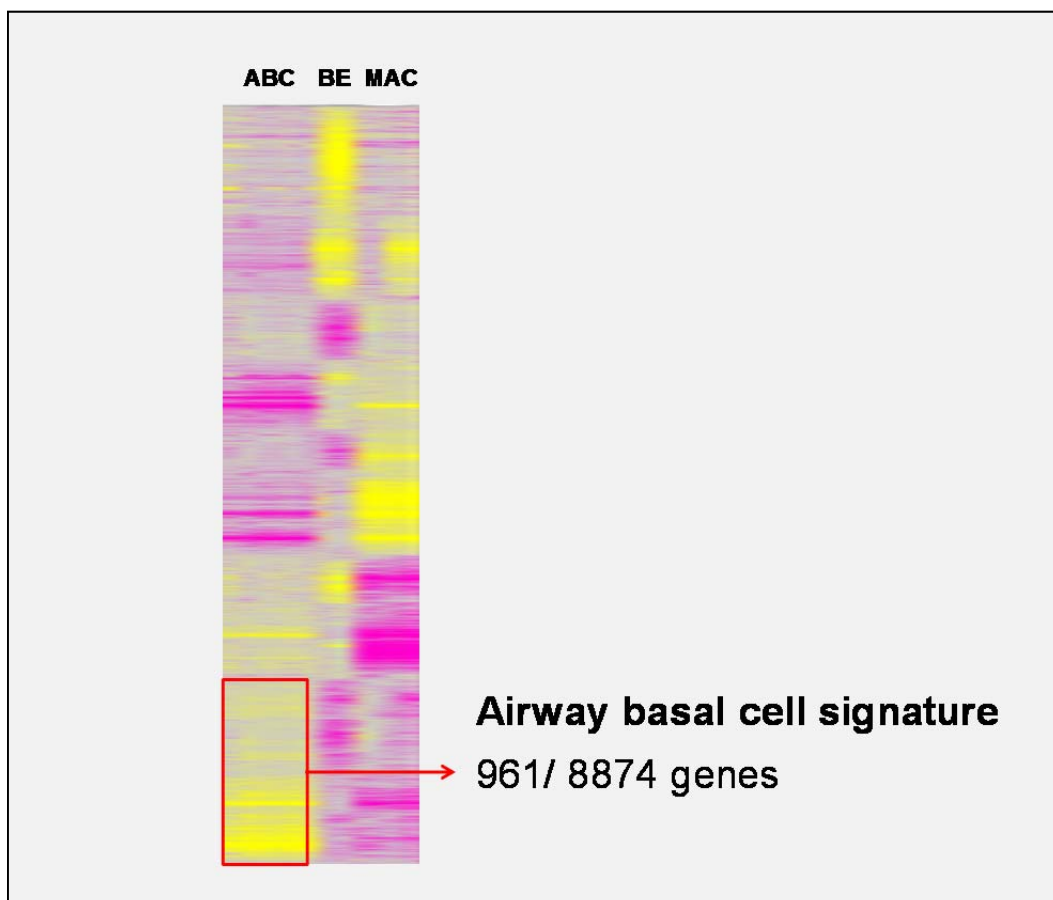

**Figure E3. Determination of the airway basal cell signature.** Gene expression of isolated airway basal cells (ABC), bronchial epithelial cells (BE) and alveolar macrophages (MAC) were obtained by microarray. Univariate F-test resulted in 8874 significantly expressed genes ( $p < 0.0001$ ). By cluster analysis of the 8874 differentially expressed genes we identified 961 genes highly expressed by airway basal cells and not expressed by bronchial epithelial cells and alveolar macrophages. Of these 961 ABC genes the BAL dataset of all 3 IPF patient cohorts contained 921 ABC genes which were used for further analysis (Table E9).

**Figure E4. Increase in CK5+ Airway Basal Cells in BAL of IPF Patients.**

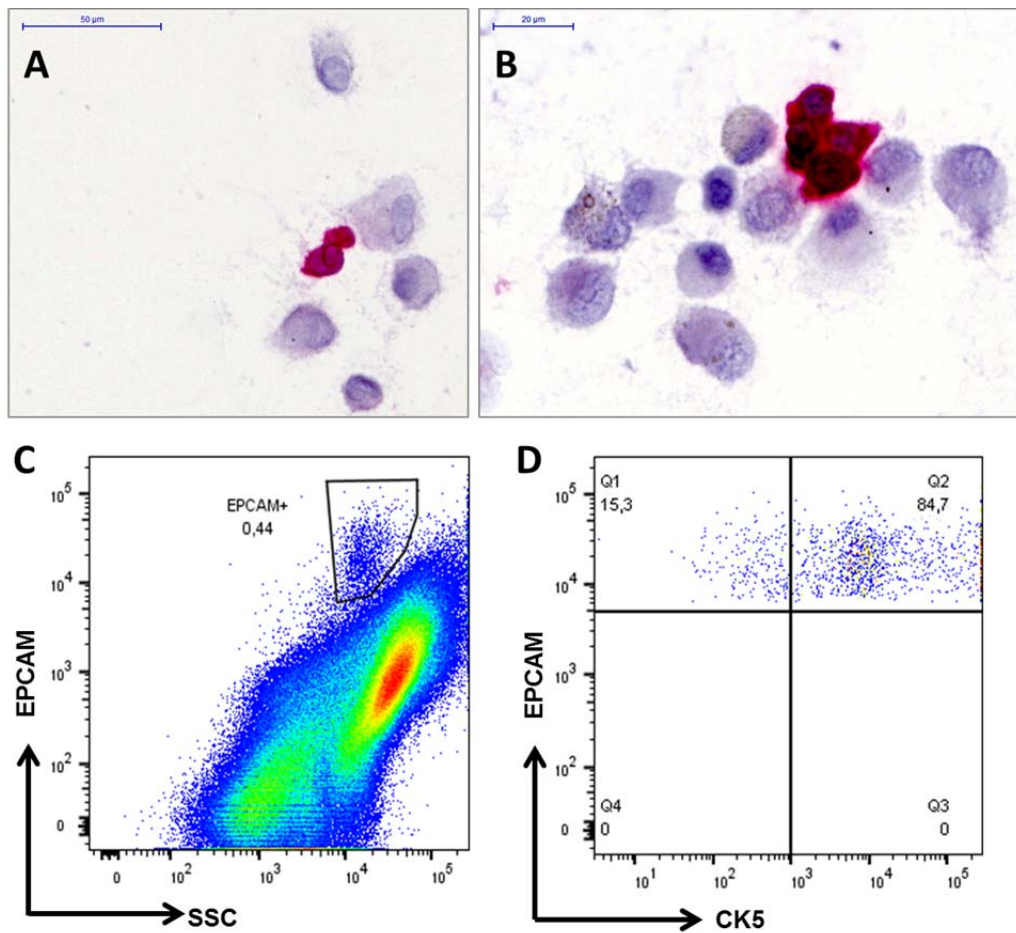

**Figure E4. Increase in CK5+ Airway Basal Cells in BAL of IPF Patients.** Panel A-D: Similar to the cytokeratin CK5/6 double staining (Figure 4) also CK5+ airway basal cells (ABC, stained in red) were found frequently in cell smears of BAL from IPF patients (Panel A and B). Flow cytometry revealed presence of EPCAM+ epithelial cells in the BAL of IPF patients and most of them co-expressed CK5 identifying these cells as ABC (Panel C-D).

**Figure E5. S100A14 Immunostaining**

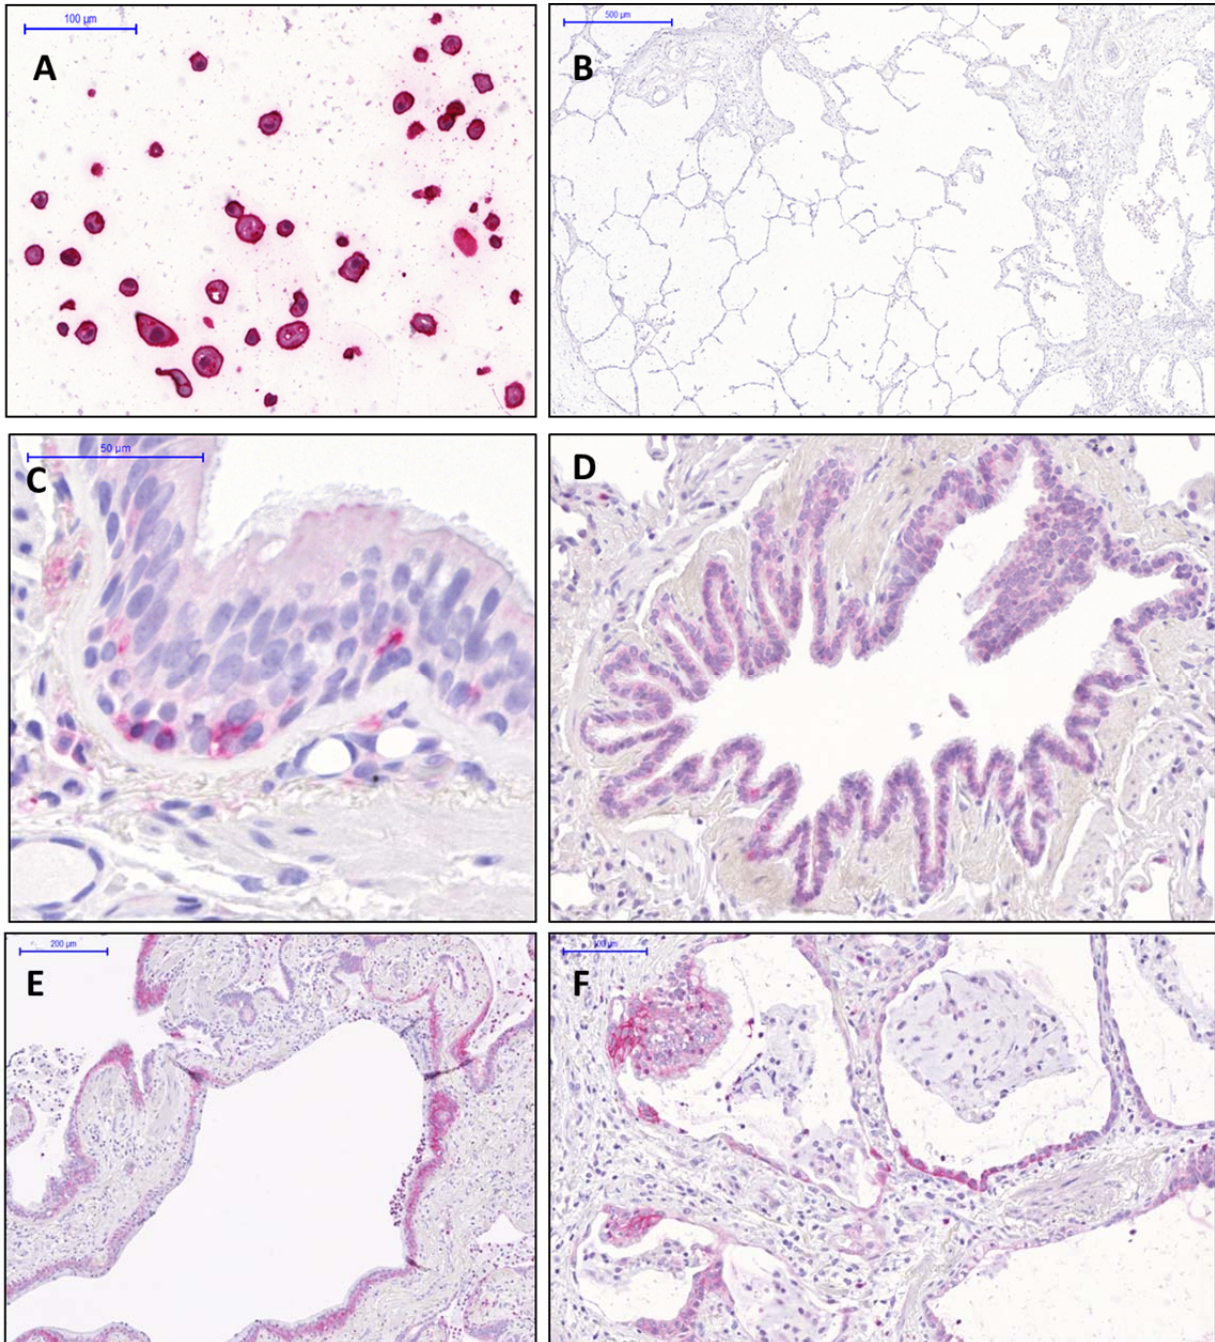

**Figure E5. S100A14 immunohistochemistry.** S100A14 immunohistochemistry of isolated airway basal cells (Panel A), normal lung tissue (Panel B,C,D) and lung tissues from two different IPF patients (Panel E and F). Panel A: Isolated airway basal cells and airway basal cells of normal healthy airways (Panel C and D) highly express S100A14 in line with our microarray experiment (Table E9 and E10). Similar to the CK5/6 and p40 staining in normal alveolar epithelium hardly any cells are stained by S100A14 (Panel B) while in IPF tissues (Panel E and F) epithelial cells covering honeycomb cysts and the epithelium covering fibroblast foci expressed S100A14.

## Supplementary References

1. American Thoracic Society. Idiopathic pulmonary fibrosis: diagnosis and treatment. International consensus statement. American Thoracic Society (ATS), and the European Respiratory Society (ERS). *Am J Respir Crit Care Med* 2000;161:646-64.
2. American Thoracic Society/European Respiratory Society International Multidisciplinary Consensus Classification of the Idiopathic Interstitial Pneumonias. This joint statement of the American Thoracic Society (ATS), and the European Respiratory Society (ERS) was adopted by the ATS board of directors, June 2001 and by the ERS Executive Committee, June 2001. *Am J Respir Crit Care Med* 2002;165:277-304.
3. Raghu G, Collard HR, Egan JJ, et al. An official ATS/ERS/JRS/ALAT statement: idiopathic pulmonary fibrosis: evidence-based guidelines for diagnosis and management. *Am J Respir Crit Care Med* 2011;183:788-824.
4. Standardization of spirometry--1987 update. Statement of the American Thoracic Society. *Am Rev Respir Dis* 1987;136:1285-98.
5. Herazo-Maya JD, Noth I, Duncan SR, et al. Peripheral blood mononuclear cell gene expression profiles predict poor outcome in idiopathic pulmonary fibrosis. *Sci Transl Med* 2013;5:205ra136.
6. Geiss GK, Bumgarner RE, Birditt B, et al. Direct multiplexed measurement of gene expression with color-coded probe pairs. *Nat Biotechnol* 2008;26:317-25.
7. Ley B, Ryerson CJ, Vittinghoff E, et al. A multidimensional index and staging system for idiopathic pulmonary fibrosis. *Ann Intern Med* 2012;156:684-91.
8. Hackett NR, Shaykhiev R, Walters MS, et al. The human airway epithelial basal cell transcriptome. *PLoS One* 2011;6:e18378.
9. Benjamini Y, Hochberg, Y. . Controlling the false discovery rate: A practical and powerful approach to multiple testing. *Journal of the Royal Statistical Society B* 1995;57:289-300.
10. Goeman JJ, van de Geer SA, de Kort F, van Houwelingen HC. A global test for groups of genes: testing association with a clinical outcome. *Bioinformatics* 2004;20:93-9.
11. Binder H, Schumacher M. Allowing for mandatory covariates in boosting estimation of sparse high-dimensional survival models. *BMC Bioinformatics* 2008;9:14.
12. Tibshirani R. The lasso method for variable selection in the Cox model. *Stat Med* 1997;16:385-95.
13. Sauerbrei W, Boulesteix AL, Binder H. Stability investigations of multivariable regression models derived from low- and high-dimensional data. *J Biopharm Stat* 2011;21:1206-31.
14. Graf E, Schmoor C, Sauerbrei W, Schumacher M. Assessment and comparison of prognostic classification schemes for survival data. *Stat Med* 1999;18:2529-45.
